# Supplementary material for: The striatal kinase DCLK3 produces neuroprotection against mutant huntingtin
Source: PubMed Central journal article supplement — Brain. 2018 Mar 9;141(5):1434–54. doi: 10.1093/brain/awy057 (PMC5917821; doi:10.1093/brain/awy057), 2018-03-09
Supplement: awy057_brain-2017-01248-file009.pdf [file awy057_brain-2017-01248-file009.pdf]

## Supplementary figures and tables

### **Fig S1. Schematic representation of DCLK3 sequences, regional expression of its mRNA in mouse brain, and autophosphorylation activity.**

**A**, Schematic representation of the primary structure of DCLK3 indicating the principal predicted functional domains, with the kinase domain, the most strongly conserved across species. **B**, Northern blot analysis was performed on poly(A)<sup>+</sup> RNA purified from wild-type mouse brain regions. Same amount of RNA was loaded in all lanes. The membrane was hybridized with a probe for the DCLK3 transcript. Note that two mRNA species are produced preferentially in the striatum: the upper band corresponds to the long form of DCLK3 (L-DCLK3 mRNA), the lower fainter band corresponds to the short form of DCLK3 (S-DCLK3 mRNA). **C**, The recombinant mouse DCLK3 proteins were produced in HEK293T cells and, after immunoprecipitation with an antibody against the HA tag, they were tested for autophosphorylation activity in presence of <sup>32</sup>P-ATP. The high molecular weight forms (black arrows) of S-rDCLK3 (73 kDa) and L-rDCLK3 (90 kDa) and the 75 kDa cleavage product of L-rDCLK3 had the highest activities.

**A****Mouse (Long)**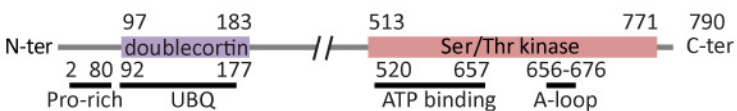**Mouse (Short)**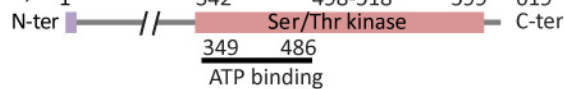**Macaque**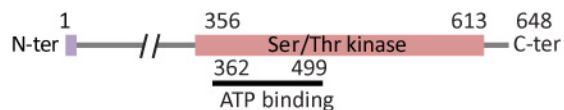**Human**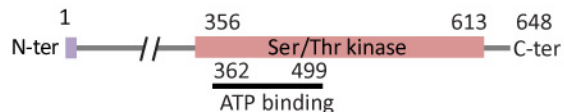**B**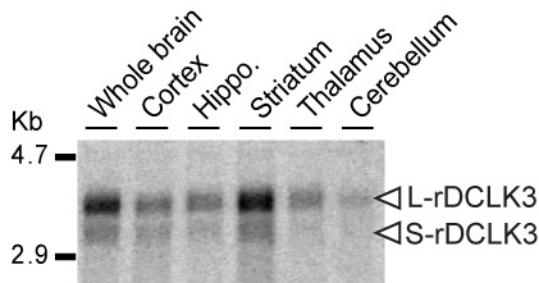**C**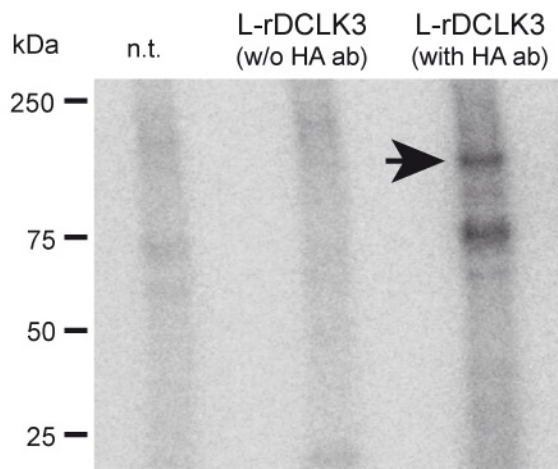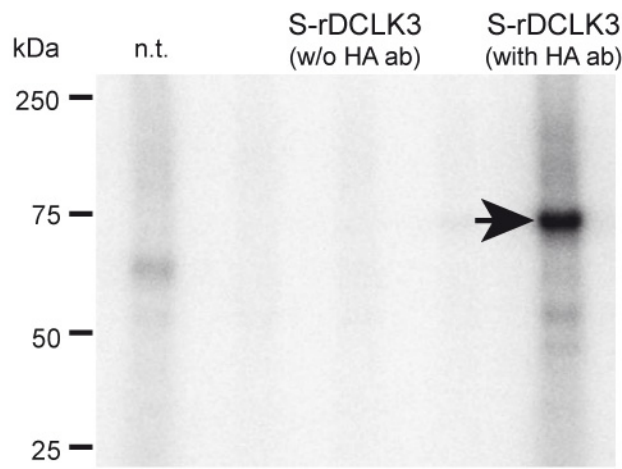

**Fig S2. Efficiency of lentiviral vectors (LV) encoding rDCLK3-HA and a shRNA targeting DCLK3**

**A**, Schematic representation of the lentiviral constructs used to overexpress S-rDCLK3-HA, L-rDCLK3-HA or to silence its expression in mice. **B**, Mice received striatal injections of LV-rDCLK3-HA (mixed with a lentiviral vector encoding GFP) or LV-shDCLK3 (bicistronic construct also encoding GFP). **C**, Six weeks later, the striatal region expressing GFP was dissected out and analyzed by RT-qPCR or western blot. **D**, LV-shDCLK3 yielded a significant ~70% decrease in DCLK3 levels. **E**, representative western blots of striatal samples showing expression of S-rDCLK3 and L-rDCLK3. Each lane represents a different striatal sample. Results are expressed as means  $\pm$  the standard error of the mean (SEM). \*,  $p < 0.01$ , Unpaired Student's  $t$  test.

**A**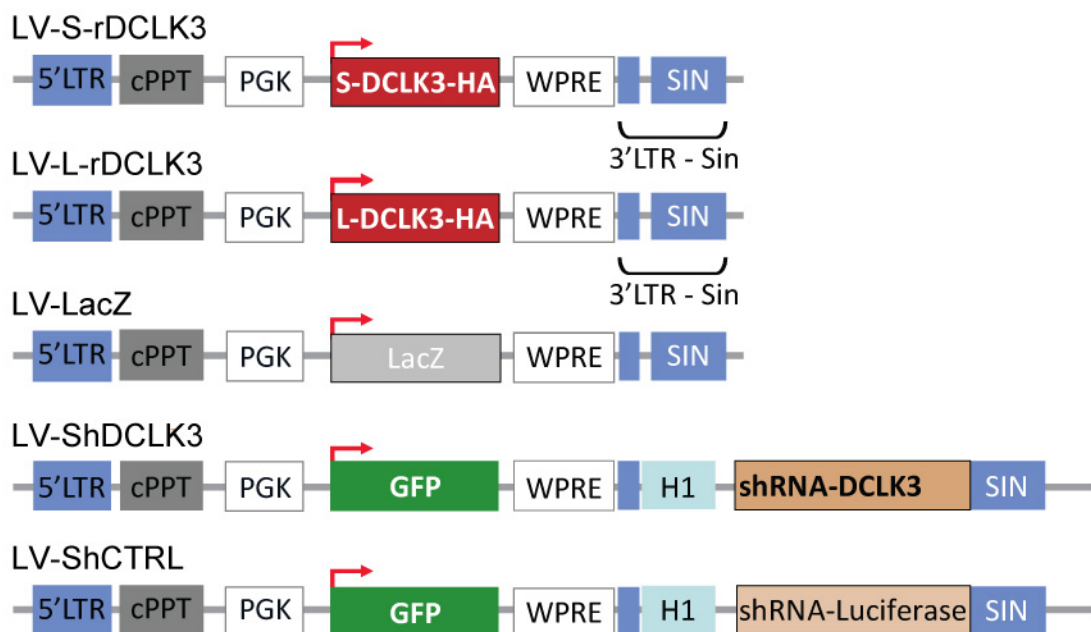**B**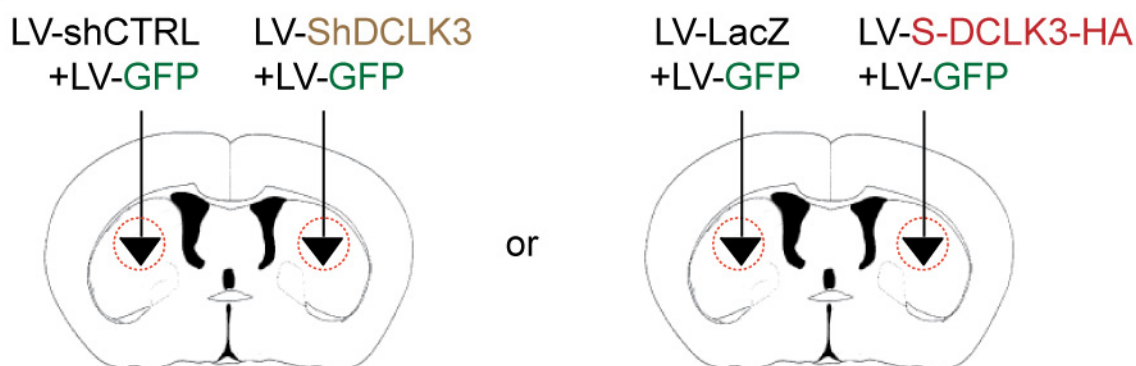**C**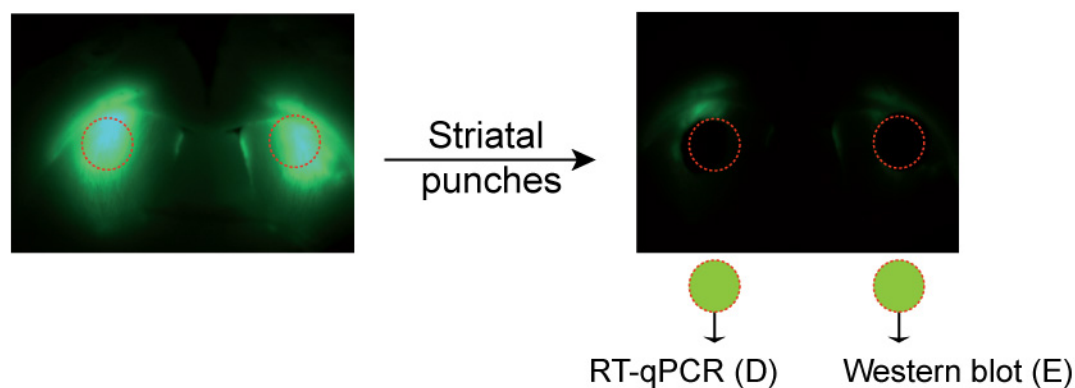**D**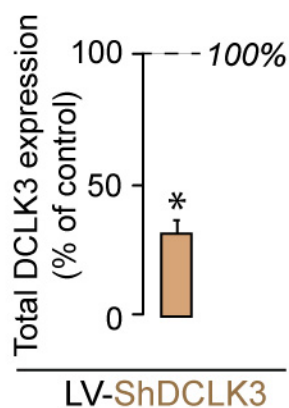**E**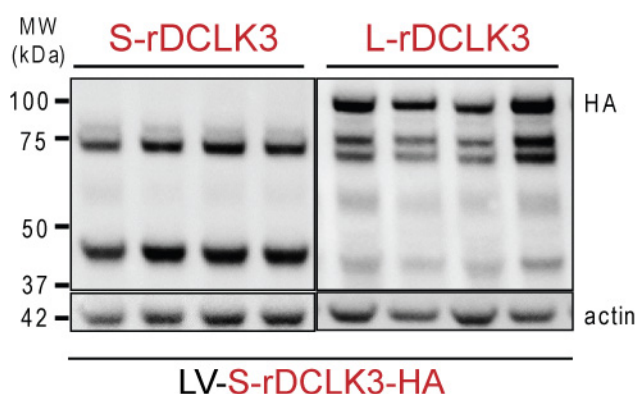

**Fig S3. Gene expression changes in knock-in 140 CAG Huntington's disease mice**

Gene expression in the striatum, as assessed by RT-qPCR, in 12-month-old KI140CAG mice. Note the reduced expression of DCLK3 mRNA in heterozygous and homozygous Huntington's disease mice. Results are presented as means  $\pm$  the standard error of the mean (SEM),  $n=8$  per group, One-way ANOVA and Fisher's *post hoc* PLSD test. \*,  $p<0.05$ , \*\*,  $p<0.001$ , \*\*\*,  $p<0.0001$ .

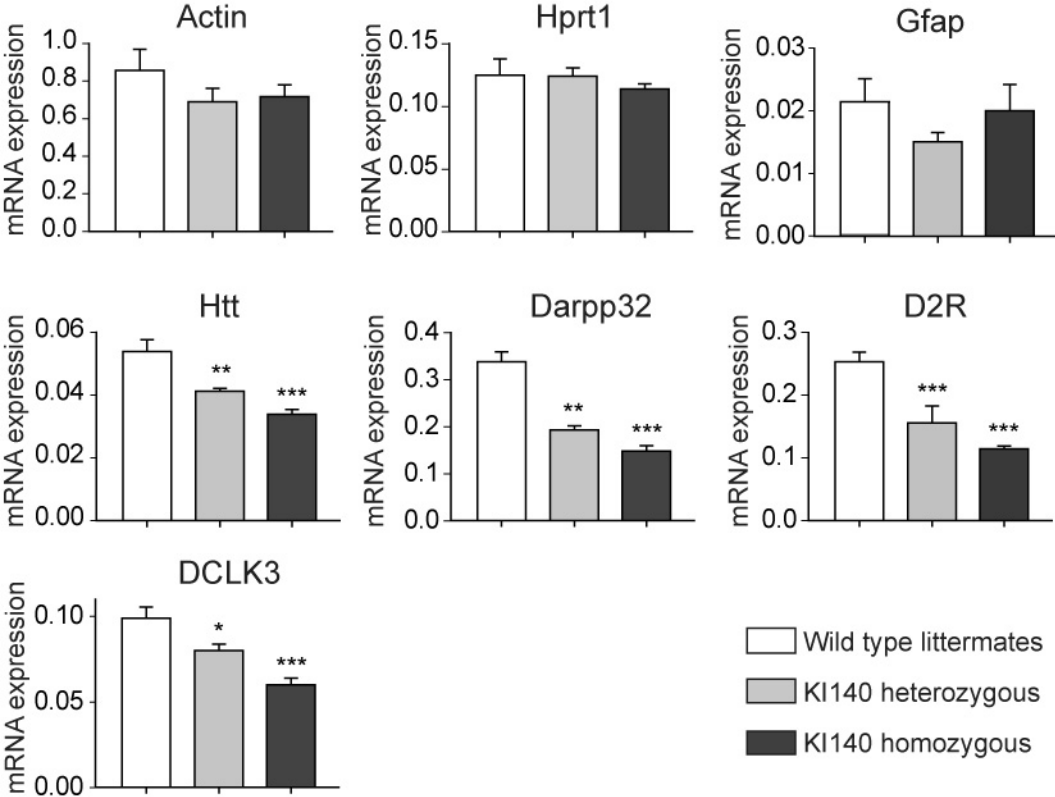

**Fig S4. The T286A substitution in S-rDCLK3 abolishes neuroprotective effects against Htt171-82Q**

Primary cultures of striatal neurons were transfected by electroporation with plasmids encoding wild-type S-rDCLK3-HA or S-rDCLK3 with the T286→A substitution, alone or together with a plasmid encoding Htt171-82Q. Forty-eight hours later, the cells were fixed and transfected neurons with apoptotic nuclei were counted. S-rDCLK3-HA decreased rates of Htt171-82Q-induced cell death, whereas the T286A mutant had no such effect. Results are expressed as the mean ± the standard error of the mean (SEM) and correspond to three independent experiments, each including three to four slides per experimental group. The numbers in italics indicate significance levels (one-way ANOVA and Fisher's *post hoc* PLSD test).

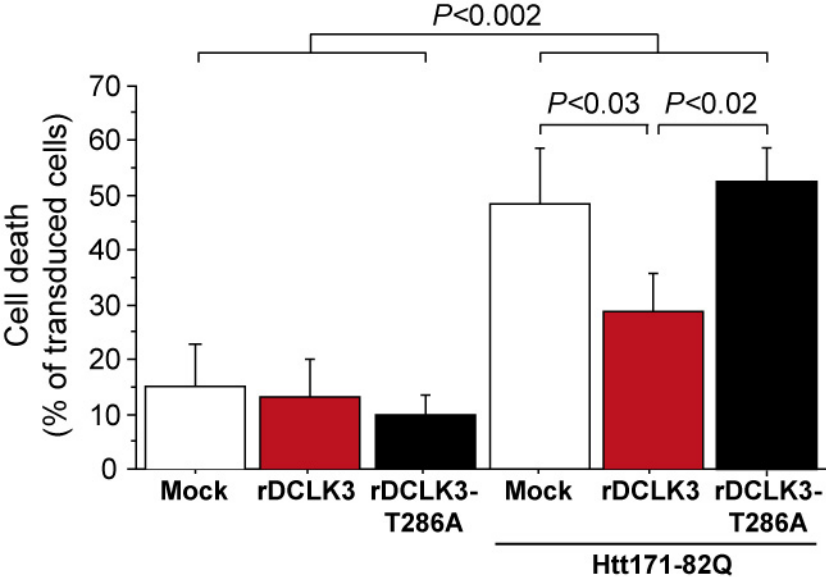



**Fig S5. Identification of K543 in mouse DCLK3 for the generation of an inactive form of the kinase**

An alignment of kinase sequences showed the conservation of a lysine (K) residue in all kinase domains (K in bold). The mutation of this conserved lysine in Akt1, AMPKa2, MNK1, MNK2, CAMKII, Aurora Kinase B and CAMKIV abolished kinase activity. The K543 → M substitution abolished the kinase activity of DCLK3 (see results in Figure 4).

## K543--&gt; M

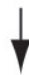

|             |                                |     |                                                                                 |     |
|-------------|--------------------------------|-----|---------------------------------------------------------------------------------|-----|
| CAMKII a2   | ■ <a href="#">NP_803126</a>    | 27  | VRRCVKVL--AGQEYAAKIINTTKLS-AR---dhQKLEREARICRLLK-HPNIVRLHDSISE-----EGH---HYLI   | 88  |
| CAMKII g3   | ■ <a href="#">NP_001034228</a> | 28  | VRRCVKKT--STQEYAAKIINTTKLS-AR---dhQKLEREARICRLLK-HPNIVRLHDSISE-----EGF---HYLV   | 89  |
| CAMKII b1   | ■ <a href="#">NP_001167524</a> | 28  | VRRCVKLC--TGHEYAAKIINTTKLS-AR---dhQKLEREARICRLLK-HSNIVRLHDSISE-----EGF---HYLV   | 89  |
| CAMK1 D     | ■ <a href="#">NP_796317</a>    | 37  | VVLAEEKA--TGKLFPAVKCIPKKALK--G---keSSIENEIAVLRKIK-HENIVALEDIYES-----PNH---LYLV  | 97  |
| CAMKIV      | ■ <a href="#">NP_033923</a>    | 56  | VYRCKQKG--TQKPYALKVLKKTV-----dkKIVRTEIGVLLRLS-HPNIIKKEIFET-----PTE---ISLV       | 113 |
| CAMK1       | ■ <a href="#">NP_598697</a>    | 34  | VILAEDKR--TQKLVIAIKCIAKKALE--G---keGSMENEIAVLHKKIK-HPNIVALDDIYES-----GGH---LYLI | 94  |
| DCLK1 i2    | ■ <a href="#">NP_001104521</a> | 97  | VKECIERS--TAREYALKIIKKSKCRGKEHM-----IQNEVSILRRVK-HPNIVLLIEEMDV-----PTE---LYLV   | 157 |
| DCLK1 i3    | ■ <a href="#">NP_001104522</a> | 97  | VKECIERS--TAREYALKIIKKSKCRGKEHM-----IQNEVSILRRVK-HPNIVLLIEEMDV-----PTE---LYLV   | 157 |
| DCLK1 i6    | ■ <a href="#">NP_001182468</a> | 113 | VKECIERS--TAREYALKIIKKSKCRGKEHM-----IQNEVSILRRVK-HPNIVLLIEEMDV-----PTE---LYLV   | 173 |
| DCLK2 i5    | ■ <a href="#">NP_001182428</a> | 422 | VKECVDRY--TGKEFALKIIDKAKCCGKEHL-----IENEVSILRRVK-HPNIIMLVEEMET-----ATD---LFLV   | 482 |
| DCLK2 i4    | ■ <a href="#">NP_001182427</a> | 423 | VKECVDRY--TGKEFALKIIDKAKCCGKEHL-----IENEVSILRRVK-HPNIIMLVEEMET-----ATD---LFLV   | 483 |
| DCLK2 i2    | ■ <a href="#">NP_081815</a>    | 407 | VKECVDRY--TGKEFALKIIDKAKCCGKEHL-----IENEVSILRRVK-HPNIIMLVEEMET-----ATD---LFLV   | 467 |
| DCLK2 i3    | ■ <a href="#">NP_001182426</a> | 406 | VKECVDRY--TGKEFALKIIDKAKCCGKEHL-----IENEVSILRRVK-HPNIIMLVEEMET-----ATD---LFLV   | 466 |
| DCLK2 i1    | ■ <a href="#">NP_001182425</a> | 422 | VKECVDRY--TGKEFALKIIDKAKCCGKEHL-----IENEVSILRRVK-HPNIIMLVEEMET-----ATD---LFLV   | 482 |
| DCLK1 i1    | ■ <a href="#">NP_064362</a>    | 420 | VKECIERS--TAREYALKIIKKSKCRGKEHM-----IQNEVSILRRVK-HPNIVLLIEEMDV-----PTE---LYLV   | 480 |
| DAPK3 b     | ■ <a href="#">NP_031854</a>    | 27  | VRKCOQKG--TGMEYAAKFIKKRRLPSSRRGvserEEIEREVSILREIR-HPNII TLHDVFEN-----KTD---VVLI | 92  |
| DAPK3 a     | ■ <a href="#">NP_001177403</a> | 44  | VRKCOQKG--TGMEYAAKFIKKRRLPSSRRGvserEEIEREVSILREIR-HPNII TLHDVFEN-----KTD---VVLI | 109 |
| DCLK3-L     | ■ <a href="#">NP_766516</a>    | 528 | VKECRHRE--TKQAYAMKMIKSKLKGKEDI-----VDSEILIIQSLs-HPNIVKLHEVYET-----EAE---IYLI    | 588 |
| RPS6K a3    | ■ <a href="#">NP_683747</a>    | 82  | VFLVKKISgdARQLYAMKVLKATLKVDRV---RTKMERDILVEVN-HPFIVKLHYAFQT-----BGK---LYLI      | 146 |
| RPS6K a1    | ■ <a href="#">NP_033123</a>    | 76  | VFLVRKVT rpdSGHLYAMKVLKATLKVDRV---RTKMERDILADVN-HPFVVKLHYAFQT-----BGK---LYLI    | 140 |
| MARK3 i1    | ■ <a href="#">NP_067491</a>    | 70  | VKLARHIL--TGREVAIKIIDKTQLNPTSL---QKLFREVRIMKILN-HPNIVKLFVIET-----EKT---LYLI     | 131 |
| MARK3 i2    | ■ <a href="#">NP_073712</a>    | 70  | VKLARHIL--TGREVAIKIIDKTQLNPTSL---QKLFREVRIMKILN-HPNIVKLFVIET-----EKT---LYLI     | 131 |
| MnK1        | ■ <a href="#">NP_067436</a>    | 51  | VQGAVNlQ--SGKEYAVKII EKQAGH-----srSRVPREVETLYQCQgNRNILELIEPFED-----DTR---FYLv   | 111 |
| AMPKa2      | ■ <a href="#">NP_835279</a>    | 30  | VKIGEHQL--TGHKVAVKILNRQKIRSLDVV---GKIKREIQNLKLF-HPHIIKLYQVIST-----PTD---PFMV    | 92  |
| MARK4       | ■ <a href="#">NP_758483</a>    | 73  | VKLARHIL--TGREVAIKIIDKTQLNPSL---QKLFREVRIMKGLN-HPNIVKLFVIET-----EKT---LYLV      | 134 |
| MnK2        | ■ <a href="#">NP_067437</a>    | 51  | VQTCVNLl--TNQEYAVKII EKQLGH-----irSRVPREVEMLYQCQgHRNVLELIEPFEE-----EDR---FYLv   | 111 |
| MAPK5       | ■ <a href="#">NP_034895</a>    | 36  | VRRCVKKS--TQERFALKILLDRPKA-----RNEVRLHMMCAHPNIVQIIIEVFANsvqfphESSprarLLIV       | 101 |
| MAPK3       | ■ <a href="#">NP_849238</a>    | 60  | VLECYHRR--SGQKCALKLLYDSFKARQE---vdHHWQAS-----G-GPHIVRILDVYEN---MHGjkrLLIV       | 119 |
| Aurora KCia | ■ <a href="#">NP_001074434</a> | 69  | VYLARLKE--NHFIVALKVLFKSEIEKEG---leHQLRREVEIQAHLQ-HRNILRLYNFYD-----DTR---IYLI    | 131 |
| Aurora KAia | ■ <a href="#">NP_035627</a>    | 160 | VYLARERQ--SKFILALKVLFKQTLEKAN---veHQLRREVEIQSHLR-HPNILRLYGYFHD-----ATR---VYLI   | 222 |
| AKT1        | ■ <a href="#">NM_005163</a>    | 163 | VILVKEKA--TGRYYAMKILKKEVIVAKD                                                   | 190 |

**Fig S6. Functional enrichment analysis of DCLK3 up-regulated genes in NSCs overexpressing rDCLK3 kinase domain vs control human striatal cells differentiated from NSCs.** Analysis has been performed with the tool DAVID. CC, cellular components; BP, biological processes; MF, Molecular functions. Significant terms are shown (adj. p value <0.05).

## GOTERM (CC, BP, MF)

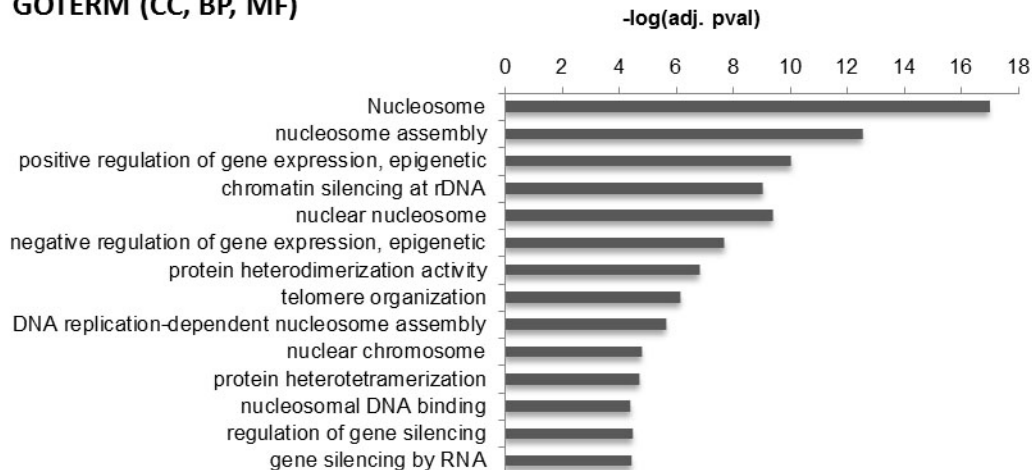

## KEGG pathway

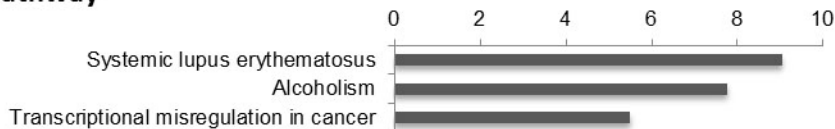

## REACTOME pathway

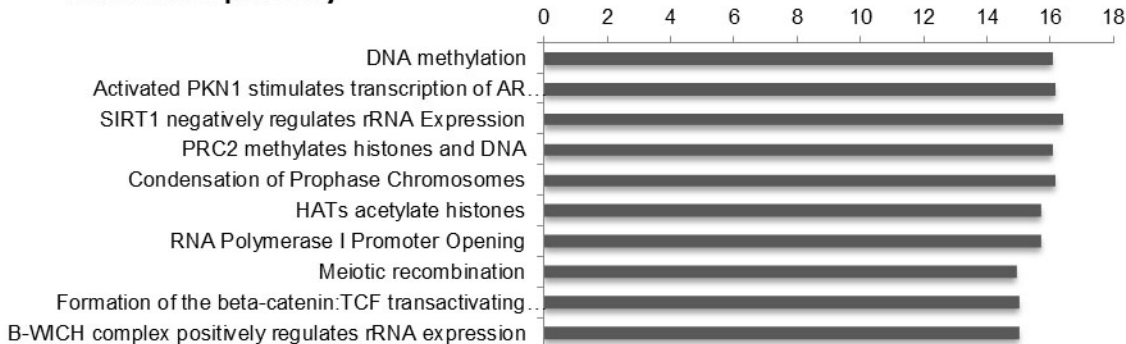

**Fig S7. Localization of DCLK3 in neurons and specificity of the anti-DCLK3 antibody (ab2189) with confocal microscopy.** **A**, rat neurons (15 DIV) showing endogenous DCLK3 in cytoplasm and nucleus. **B**, immunoreactivity disappears when the primary ab2189 antibody was pre-incubated with purified human DCLK3 protein before incubation on methanol-fixed rat neurons. **B**, DCLK3 immunofluorescence in the striatum using floating brain sections from a non-human primate. **C**, DCLK3 immunofluorescence in the cerebral cortex (layer V) using floating brain sections from a non-human primate. Pre-incubation of the Ab2189 antibody markedly reduces the signal. Note that DCLK3 in floating sections is found both in the cytoplasm and nucleus of neurons. Scale bars, 10  $\mu$ m.



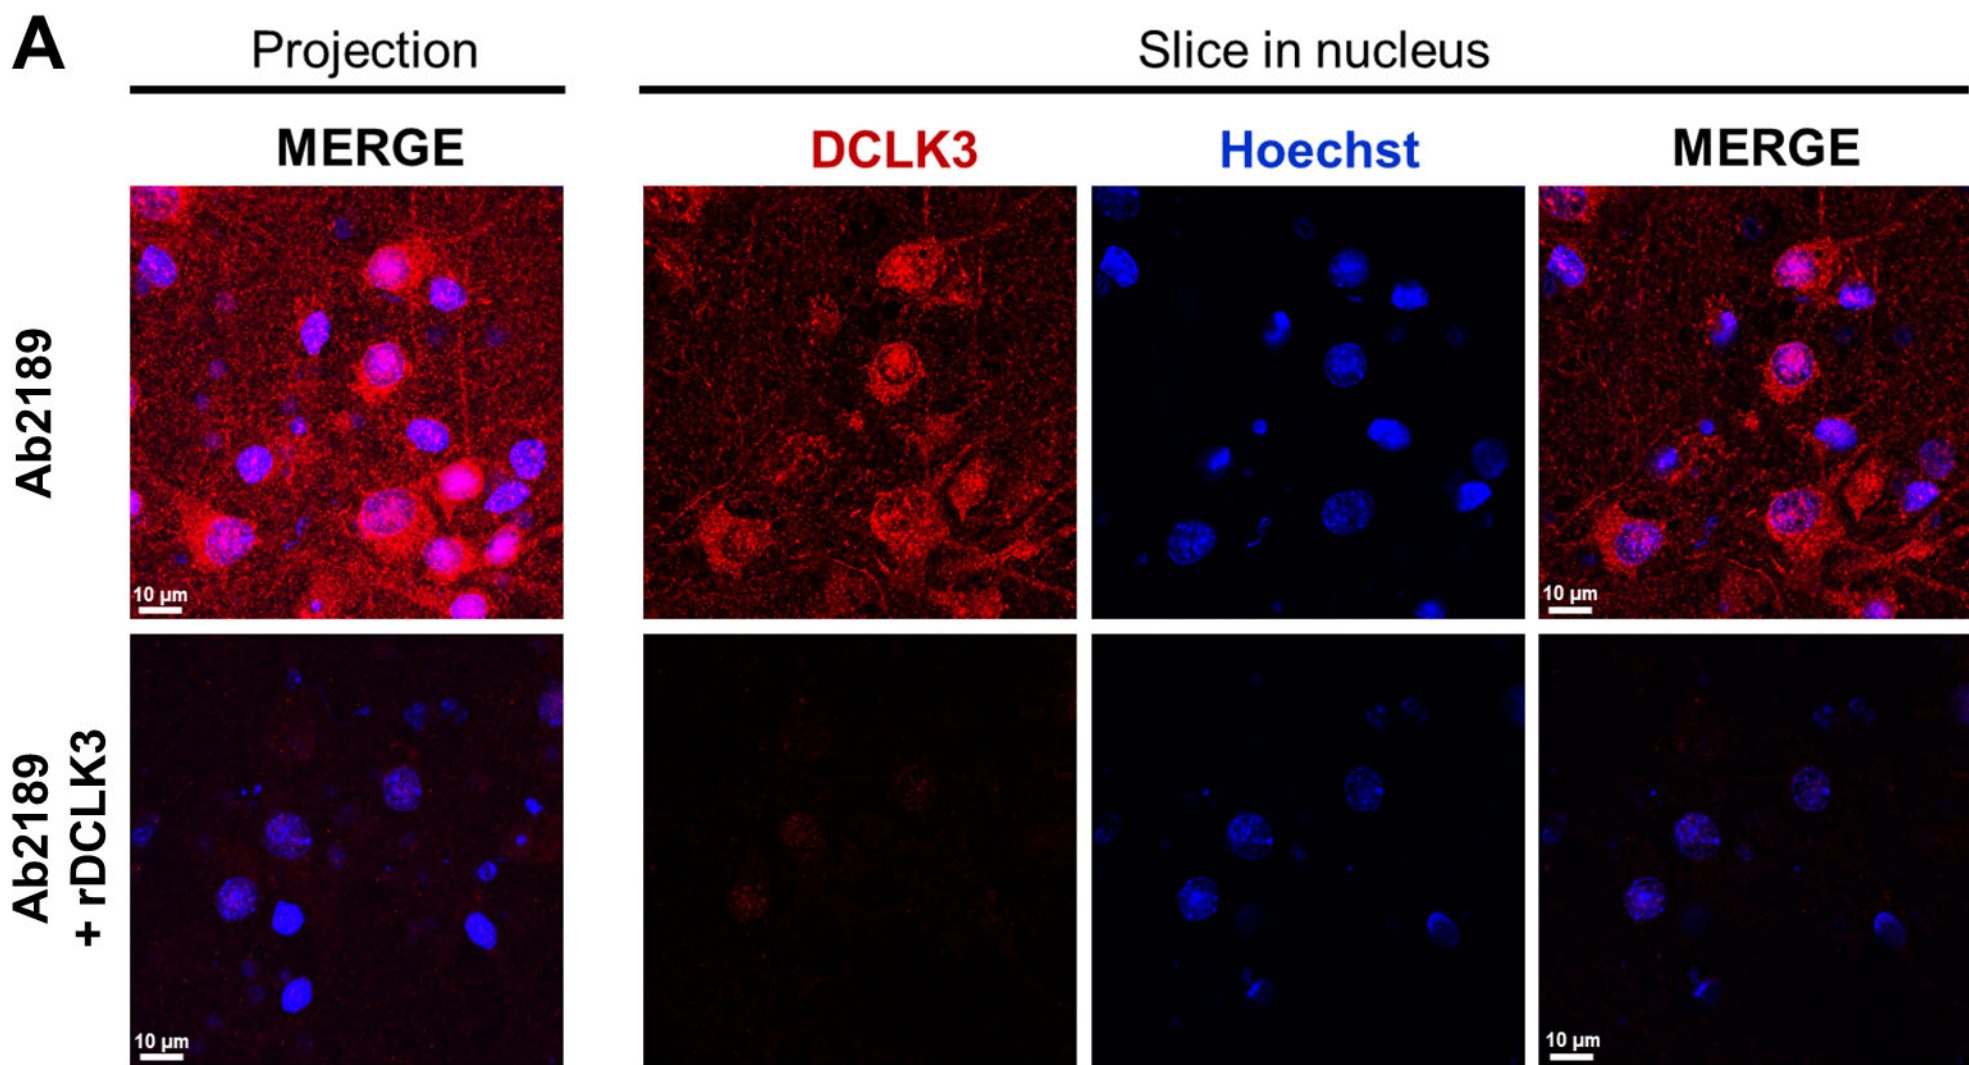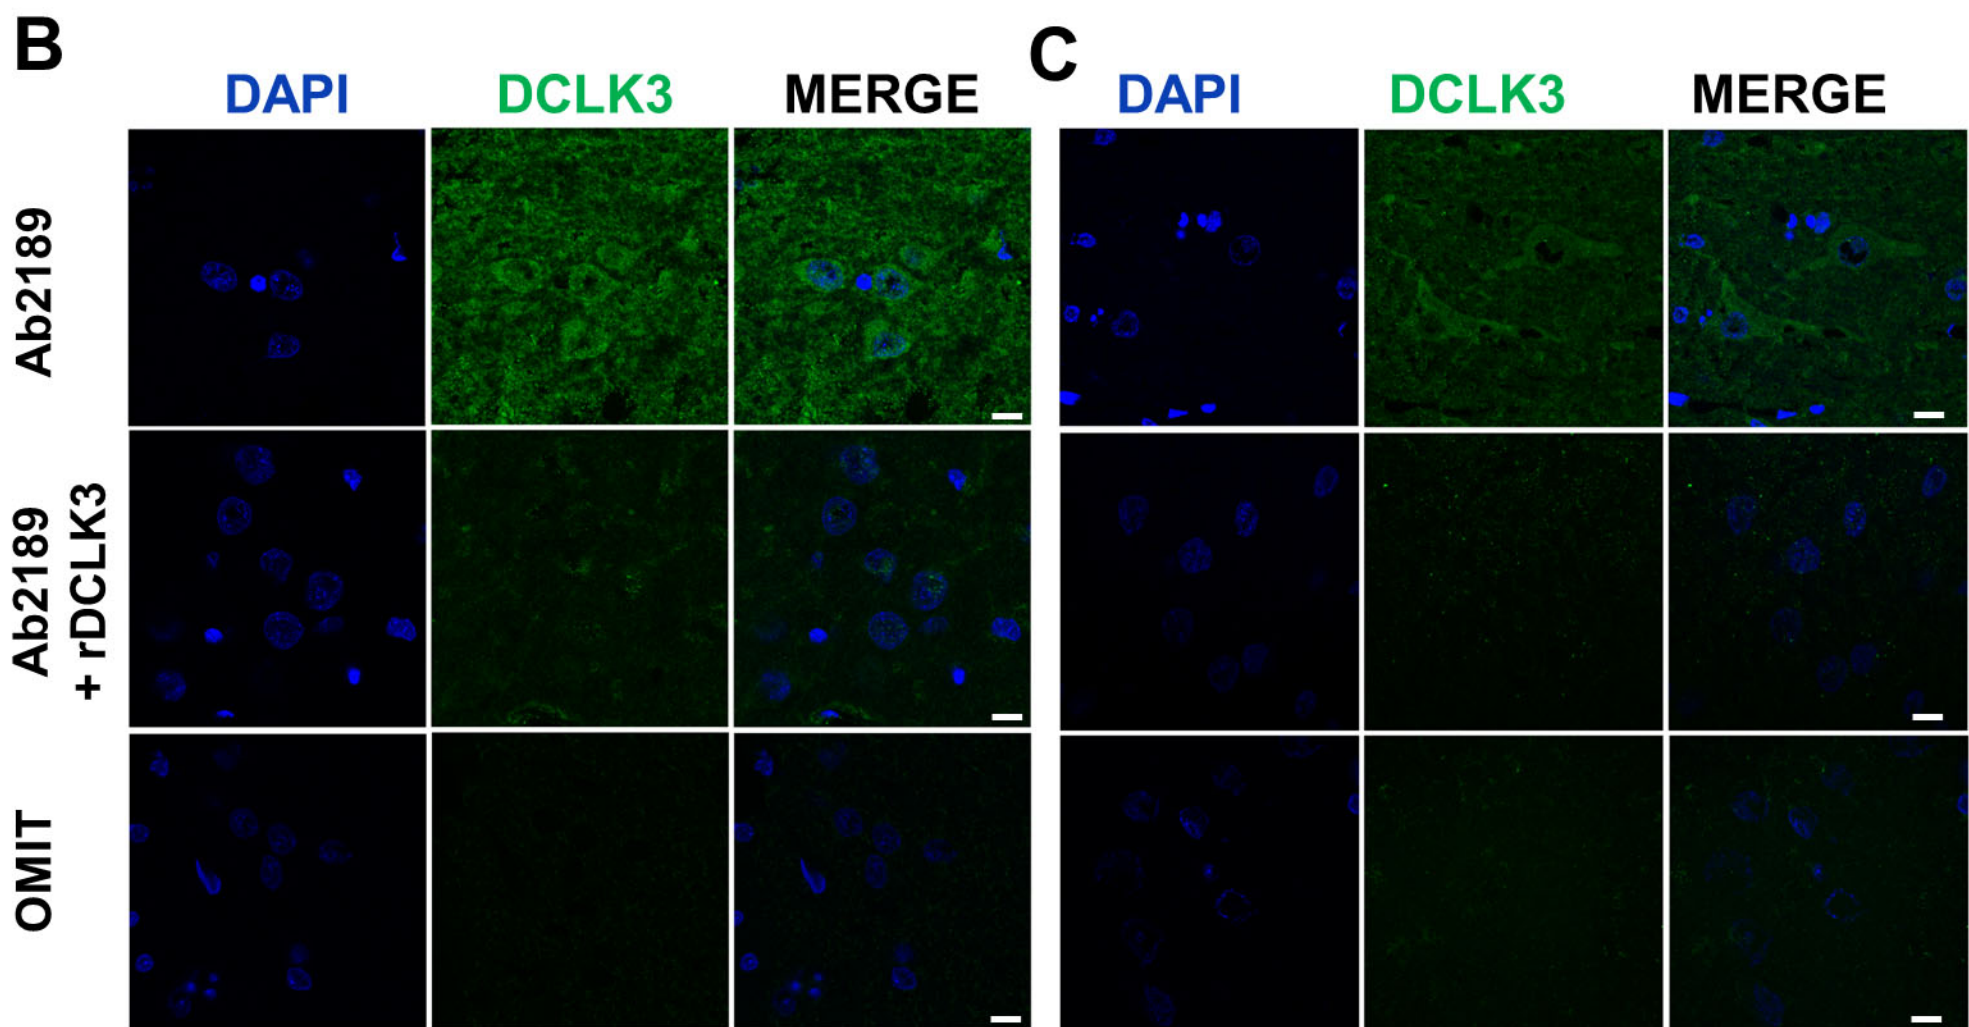

**Fig S8. Localization of Kin-rDCLK3 in human striatal neurons expressing mHtt.**

Striatal neurons were fixed in PFA 4%, at 10 days post- infection with LV-Htt171-82Q and either Kin-rDCLK3<sup>WT</sup> or Kin-rDCLK3<sup>K543M</sup>. DCLK3 was detected with Ab2189 and confocal imaging. Note the localization of DCLK3 in the cytoplasm and nuclei (White arrow). Scale bar, 10  $\mu$ m.

Projection

Slice in nucleus

Ab2189

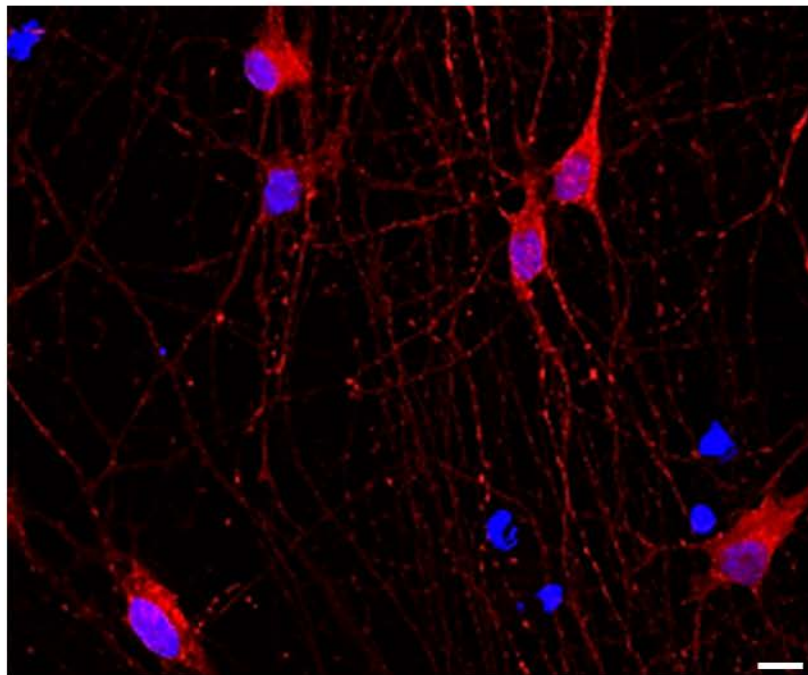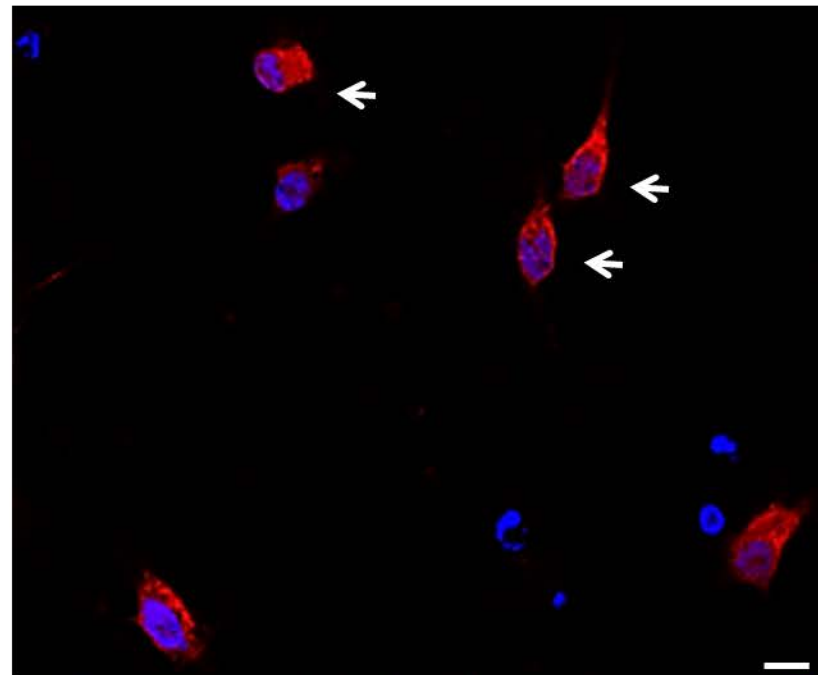

mHtt + Kin-rDCLK3

Ab2189

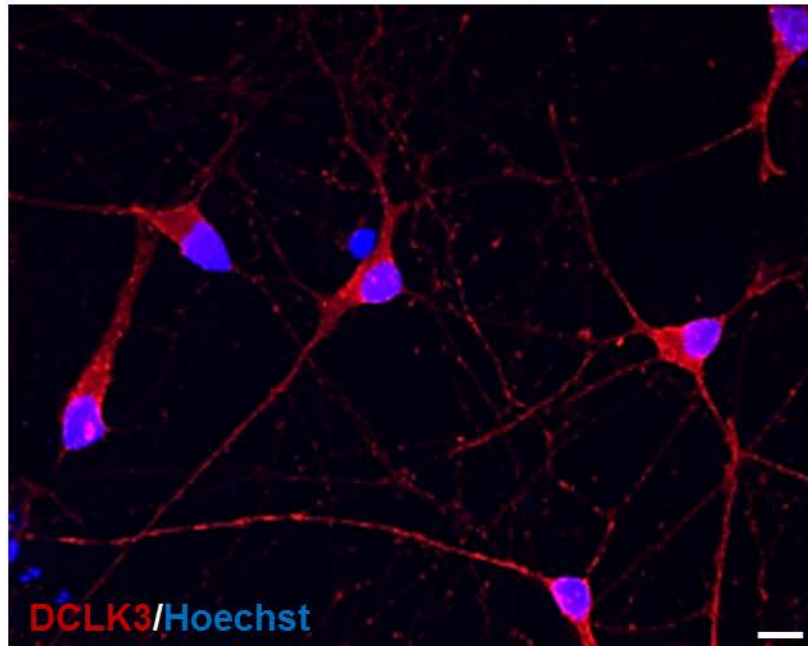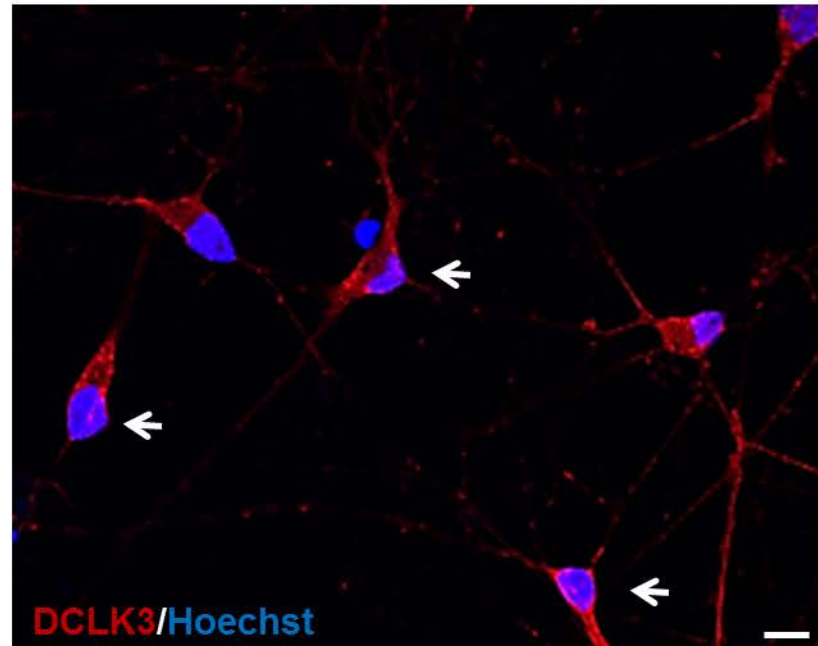

mHtt + Kin-Rdcl3<sup>K543M</sup>



**Fig S9. Comparison of DCLK3 and DCLK1 with bioinformatics tools.** **A**, Dendrogram showing the different kinase families related to DCLKs (after Ohmae et al. 2006). **B**, amino acids alignment of human DCLK1 and human DCLK3 showing 56% identities, with conservation of the kinase domains (pink and grey) and many differences throughout the sequences (<https://blast.ncbi.nlm.nih.gov/>). **C**, DCLK1 and DCLK3 kinase domains were modeled using Phyre2 [<http://www.sbg.bio.ic.ac.uk/phyre2/html>; Kelley LA et al., 2015, The Phyre2 web portal for protein modeling, prediction and analysis, Nature Protocols 10, 845-858] and visualized with NGL viewer 0.7dev ([proteininformatics.charite.de/ngl-tools/ngl/](http://proteininformatics.charite.de/ngl-tools/ngl/)). Queries were submitted through Protein Model Portal (Hass J. et al., DataBase 2013).

A

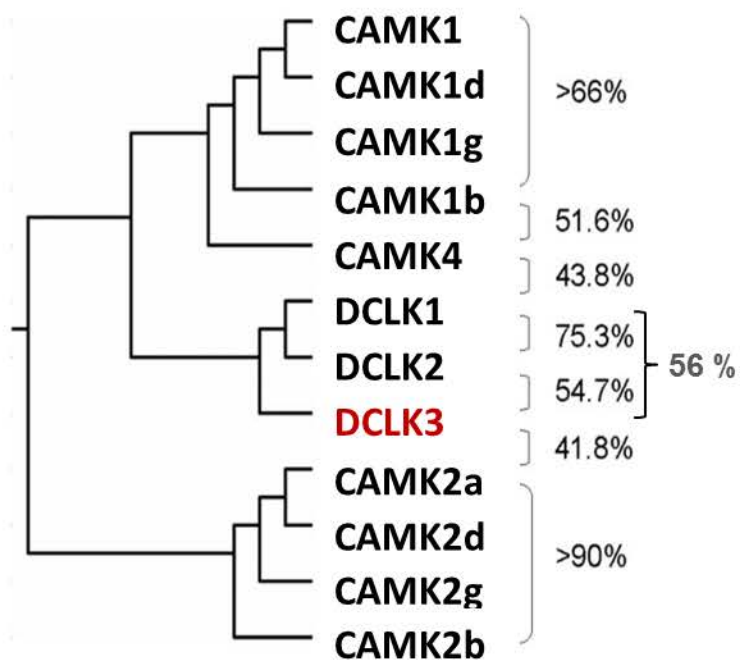

B

| Alignment statistics DCLK3 / DCLK1 |                    |                                                               |              |              |           |
|------------------------------------|--------------------|---------------------------------------------------------------|--------------|--------------|-----------|
| Score                              | Expect             | Method                                                        | Identities   | Positives    | Gaps      |
| 332 bits(852)                      | 1e-10 <sup>8</sup> | Compositional matrix adjust.                                  | 150/270(56%) | 203/270(75%) | 0/270(0%) |
| DCLK3                              | 348                | IAANVEKHYETGRVIGDGNFAVVKECRHRETRQAYAMKIIDKSRLKGKEDMVDSEILIIQ  |              | 407          |           |
|                                    |                    | I A + + Y+ GR IGDGNFAVVKEC R T+ YA+KII KS++ GKE M+ +E+ I++    |              |              |           |
| DCLK1                              | 382                | IPATITERYKVGRTIGDGNFAVVKECVERSTAREYALKI IKKSKCRGKEHMIQNEVSILR |              | 441          |           |
| DCLK3                              | 408                | SLSHPNIVKLHEVYETDMEIYLILEYVQGGDLFDALIESVKFPEPDAAALMIMDLCKALVH |              | 467          |           |
|                                    |                    | + HPNIV L E + E+YL++E V+GGDLFDAL + K+ E DA+ M+ +L A+ +        |              |              |           |
| DCLK1                              | 442                | RVKHPNIVLLIEEMDVPTELYLVMELVKGGDLFDALITSTNKYTERDASGMLYNLASAIKY |              | 501          |           |
| DCLK3                              | 468                | MHDKSIVHRDLKPENLLVQRNEDKSTTLKLADFGGLAKHVVRPIFTVCGTPTYVAPEILSE |              | 527          |           |
|                                    |                    | +H +IVHRD+KPENLLV ++D S +LKL DFGLA V P++TVCGTPTYVAPEI++E      |              |              |           |
| DCLK1                              | 502                | LHSLNIVHRDIKPENLLVYEHQDGSKSLKLGDFGLATIVDGPLYTVCGTPTYVAPEIIAE  |              | 561          |           |
| DCLK3                              | 528                | KGYGLEVDMWAAGVILYILLCGFPPFRSPERDQDELFNIIQLGHFEFLPPYWDNISDAAK  |              | 587          |           |
|                                    |                    | GYGL+VD+WAAGVI YILLCGFPPFR DQ+ LF+ I +G +F PYWDN+SD+AK        |              |              |           |
| DCLK1                              | 562                | TGYGLKVDIWAAGVITYILLCGFPPFRSGDDQEVLFQILMGQVDFPSPYWDNVSDSAK    |              | 621          |           |
| DCLK3                              | 588                | DLVSRLLVDPKKRYTAHQVLQHPWIETAG                                 | 617          |              |           |
|                                    |                    | +L++ +L+VD +R++A QVL+HPW+ G                                   |              |              |           |
| DCLK1                              | 622                | ELITMMLLVVDVQRFSAVQVLEHPWVNDG                                 | 651          |              |           |

Kinase domain

C

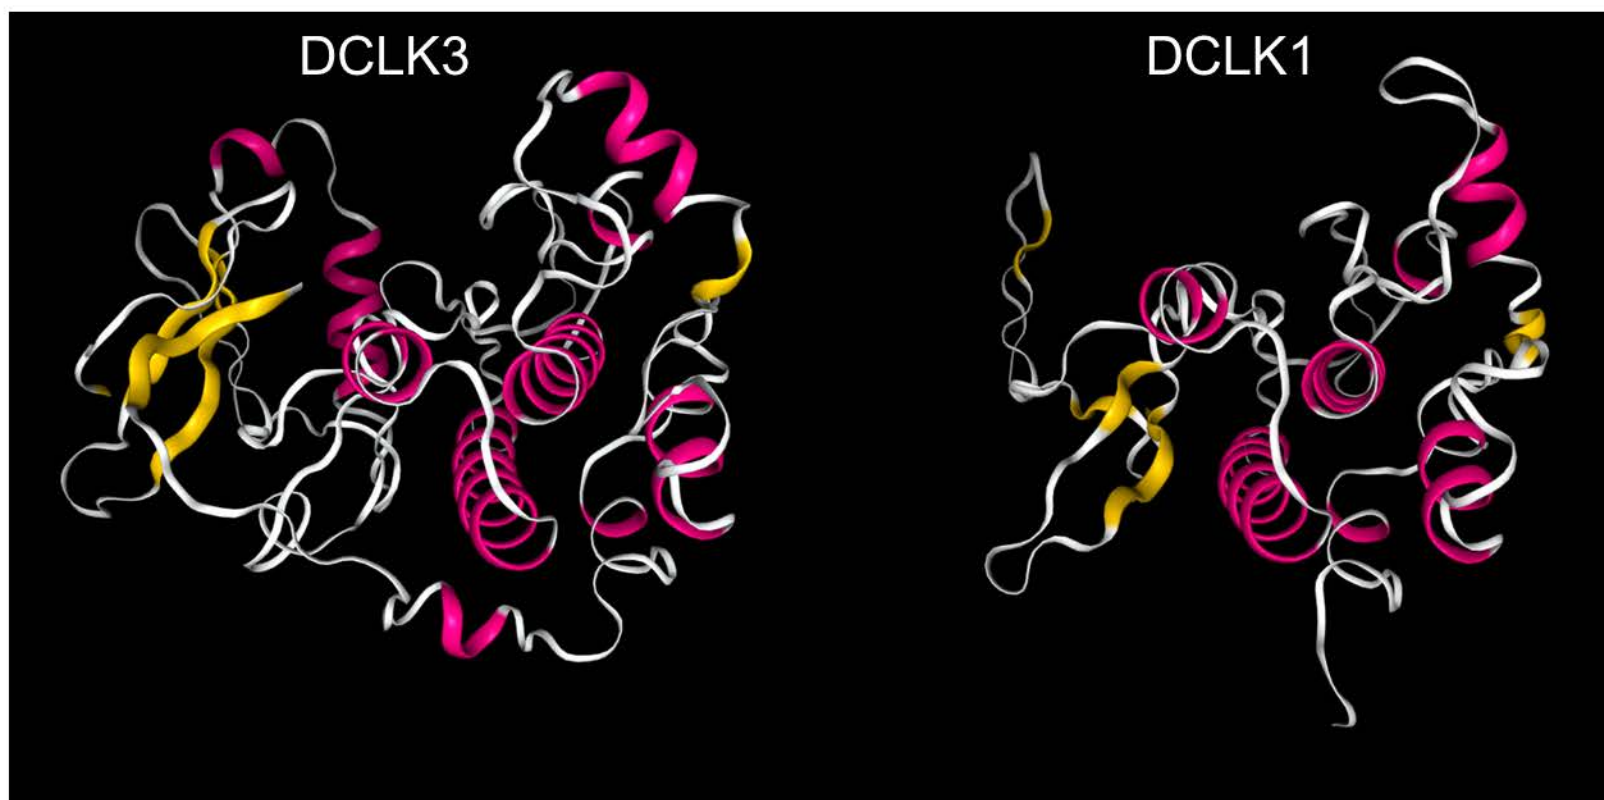

## Legends of supplementary Tables

**Table S1: Summary information relating to the protein partners of DCLK3 kinase domain identified by Y2H.** Levels of confidence for each partner are indicated in B column. Putative functions have been extracted with String 10.0. The SAGE tag counts (normalized to 80,000 tags per library) indicate relative level of expression of partner RNA in the different brain regions that were investigated in (Brochier et al., 2008). Note that TADA3 expression is high in all brain regions, including the striatum.

TABLE S1  
GALVAN L., et al.

| Human gene    | Nb Y2H clones / Confidence | Gene ID         | Summary at <a href="http://www.ncbi.nlm.nih.gov/gene">http://www.ncbi.nlm.nih.gov/gene</a> or <a href="http://string-db.org">http://string-db.org</a>                                                                                                                                                                                                                                                                                                                                                                                                                                                                                                                                                                                                                                                                                                                                                                             |
|---------------|----------------------------|-----------------|-----------------------------------------------------------------------------------------------------------------------------------------------------------------------------------------------------------------------------------------------------------------------------------------------------------------------------------------------------------------------------------------------------------------------------------------------------------------------------------------------------------------------------------------------------------------------------------------------------------------------------------------------------------------------------------------------------------------------------------------------------------------------------------------------------------------------------------------------------------------------------------------------------------------------------------|
| <b>BTBD9</b>  | 5                          | Gene ID: 114781 | This locus encodes a BTB/POZ domain-containing protein. This domain is known to be involved in protein-protein interactions. Polymorphisms at this locus have been reported to be associated with susceptibility to Restless Legs Syndrome and may also be associated with Tourette Syndrome. Alternatively spliced transcript variants have been described.                                                                                                                                                                                                                                                                                                                                                                                                                                                                                                                                                                      |
| <b>SALL1</b>  | 2                          | Gene ID: 6299   | The protein encoded by this gene is a zinc finger transcriptional repressor and may be part of the NuRD histone deacetylase complex (HDAC). Defects in this gene are a cause of Townes-Brocks syndrome (TBS) as well as bronchio-oto-renal syndrome (BOR). Two transcript variants encoding different isoforms have been found for this gene.                                                                                                                                                                                                                                                                                                                                                                                                                                                                                                                                                                                     |
| <b>TRIM39</b> | 1                          | Gene ID: 56658  | The protein encoded by this gene is a member of the tripartite motif (TRIM) family. The TRIM motif includes three zinc-binding domains, a RING, a B-box type 1 and a B-box type 2, and a coiled-coil region. The function of this protein has not been identified. This gene lies within the major histocompatibility complex class I region on chromosome 6. Alternate splicing results in two transcript variants encoding different isoforms                                                                                                                                                                                                                                                                                                                                                                                                                                                                                   |
| <b>TADA3</b>  | 22                         | Gene ID: 10474  | DNA-binding transcriptional activator proteins increase the rate of transcription by interacting with the transcriptional machinery bound to the basal promoter in conjunction with adaptor proteins, possibly by acetylation and destabilization of nucleosomes. The protein encoded by this gene is a transcriptional activator adaptor and a component of the histone acetyl transferase (HAT) coactivator complex which plays a crucial role in chromatin modulation and cell cycle progression. Along with the other components of the complex, this protein links transcriptional activators bound to specific promoters, to histone acetylation and the transcriptional machinery. The protein is also involved in the stabilization and activation of the p53 tumor suppressor protein that plays a role in the cellular response to DNA damage. Alternate splicing results in multiple transcript variants of this gene. |
| <b>ZNF12</b>  | 2                          | Gene ID: 7559   | This gene is a member of the krueppel C2H2-type zinc-finger protein family and encodes a protein with eight C2H2-type zinc fingers and a KRAB domain. This nuclear protein is involved in developmental control of gene expression. Alternate transcriptional splice variants, encoding different isoforms, have been characterized.                                                                                                                                                                                                                                                                                                                                                                                                                                                                                                                                                                                              |
| <b>ZNF292</b> | 2                          | Gene ID: 23036  | zinc finger protein 292; May be involved in transcriptional regulation                                                                                                                                                                                                                                                                                                                                                                                                                                                                                                                                                                                                                                                                                                                                                                                                                                                            |
| <b>ZNF366</b> | 1                          | Gene ID: 167465 | zinc finger protein 366; Has transcriptional repression activity. Acts as corepressor of ESR1; the function seems to involve CTBP1 and histone deacetylase                                                                                                                                                                                                                                                                                                                                                                                                                                                                                                                                                                                                                                                                                                                                                                        |

| Mouse gene    | SAGE tag count (normalized to 80,000 tags per library) (Brochier et al., 2008) |             |            |              |              |          |                  |               |          |              |          |                  |     |  |
|---------------|--------------------------------------------------------------------------------|-------------|------------|--------------|--------------|----------|------------------|---------------|----------|--------------|----------|------------------|-----|--|
|               | Sau3A I tag                                                                    | Whole brain | Orbital c. | Prelimbic c. | Cingulate c. | Motor c. | Somatosensory c. | Entorhinal c. | Striatum | Accumbens n. | Thalamus | Substantia nigra | VTA |  |
| <b>Btbd9</b>  | TTCCAGAGAT                                                                     | 0           | 1          | 1            | 1            | 0        | 1                | 1             | 0        | 1            | 3        | 0                | 1   |  |
| <b>Sall1</b>  | AAGAGCAGGT                                                                     | 1           | 1          | 0            | 1            | 1        | 1                | 1             | 0        | 3            | 3        | 1                | 0   |  |
| <b>Trim39</b> | CACTAATGTG                                                                     | 0           | 2          | 1            | 1            | 1        | 1                | 2             | 1        | 1            | 0        | 0                | 0   |  |
| <b>Tada3</b>  | ATGGCTGCC                                                                      | 3           | 4          | 5            | 2            | 2        | 4                | 0             | 3        | 2            | 1        | 4                | 1   |  |
| <b>Zfp12</b>  | TGATTTGTT                                                                      | 0           | 0          | 0            | 0            | 1        | 0                | 0             | 1        | 1            | 0        | 0                | 0   |  |
| <b>Zfp366</b> | TAGGCAGTTC                                                                     | 0           | 0          | 0            | 0            | 0        | 0                | 0             | 0        | 0            | 0        | 0                | 0   |  |
| <b>Zfp292</b> | ATTCAGTAAC                                                                     | 0           | 0          | 0            | 0            | 0        | 0                | 0             | 1        | 1            | 0        | 2                | 1   |  |

**Table S2: Table recapitulating the list of genes modified with high statistical confidence between GFP and Kin-rDCLK3<sup>WT</sup> after infection of human striatal neurons.** Transcriptomic analysis has been performed by AmpliSeq on extracts from four culture wells for each group, 12 days after infection. Filtering of data (fold-change>1.20 and adjusted p<0.0005, FDR<0.05) selected 161 genes of interest. Separate lists of down- and upregulated genes can be found by scrolling down the data sheet.

**Supplemental Table S2**

**Galvan et al.**

**All genes statistically modified between GFP and Kin-DCLK3 (WT)**

fold-change>1.20  
and adjusted  
 $p < 0.0005$ ,  
FDR<0.05

| Gene symbol | Total reads | P-value (GFP vs, KIN-WT) | FDR step up (GFP vs, KIN-WT) | Ratio (GFP vs, KIN-WT) | Fold change (GFP vs, KIN-WT) |
|-------------|-------------|--------------------------|------------------------------|------------------------|------------------------------|
| ACTR3B      | 9,53E+02    | 2,30E-04                 | 2,87E-02                     | 1,47E+00               | 1,47E+00                     |
| ALDH1B1     | 6,04E+02    | 1,49E-04                 | 2,19E-02                     | 1,59E+00               | 1,59E+00                     |
| ANK2        | 4,47E+04    | 2,05E-04                 | 2,70E-02                     | 1,20E+00               | 1,20E+00                     |
| ARF4        | 3,96E+04    | 1,86E-07                 | 1,42E-04                     | 7,76E-01               | -1,29E+00                    |
| ATP10B      | 2,19E+02    | 1,18E-04                 | 1,94E-02                     | 1,65E+00               | 1,65E+00                     |
| ATP1A2      | 7,75E+03    | 7,83E-06                 | 2,72E-03                     | 1,66E+00               | 1,66E+00                     |
| ATP7B       | 5,86E+02    | 2,64E-04                 | 3,11E-02                     | 1,55E+00               | 1,55E+00                     |
| BASP1       | 4,37E+04    | 7,68E-07                 | 4,97E-04                     | 1,47E+00               | 1,47E+00                     |
| BBX         | 6,08E+03    | 8,46E-12                 | 2,59E-08                     | 7,20E-01               | -1,39E+00                    |
| BIVM        | 5,11E+03    | 8,04E-05                 | 1,47E-02                     | 1,76E+00               | 1,76E+00                     |
| BSX         | 1,00E+01    | 5,48E-04                 | 4,95E-02                     | 7,42E-04               | -1,35E+03                    |
| BTN2A1      | 4,82E+03    | 4,71E-04                 | 4,46E-02                     | 8,29E-01               | -1,21E+00                    |
| C1orf213    | 9,11E+02    | 6,96E-05                 | 1,33E-02                     | 5,08E-01               | -1,97E+00                    |
| C21orf91    | 2,56E+03    | 4,08E-06                 | 1,56E-03                     | 7,14E-01               | -1,40E+00                    |
| C4orf48     | 2,99E+03    | 3,68E-04                 | 3,92E-02                     | 1,56E+00               | 1,56E+00                     |
| C9orf172    | 2,03E+03    | 1,06E-10                 | 2,72E-07                     | 1,66E+00               | 1,66E+00                     |
| CCNB1IP1    | 2,66E+03    | 1,06E-07                 | 1,02E-04                     | 7,13E-01               | -1,40E+00                    |
| CCND2       | 8,43E+03    | 3,64E-05                 | 8,32E-03                     | 1,36E+00               | 1,36E+00                     |
| CHMP1B      | 1,88E+04    | 5,34E-05                 | 1,09E-02                     | 7,75E-01               | -1,29E+00                    |
| CHRD        | 3,73E+02    | 2,35E-04                 | 2,90E-02                     | 1,57E+00               | 1,57E+00                     |
| CPNE5       | 1,54E+03    | 4,97E-04                 | 4,67E-02                     | 1,39E+00               | 1,39E+00                     |
| CRCP        | 5,84E+02    | 6,16E-05                 | 1,21E-02                     | 5,74E-01               | -1,74E+00                    |
| DANCR       | 4,70E+02    | 3,19E-04                 | 3,54E-02                     | 6,21E-01               | -1,61E+00                    |
| DCAF16      | 2,55E+03    | 2,05E-05                 | 5,71E-03                     | 7,40E-01               | -1,35E+00                    |
| DHRS2       | 4,79E+03    | 2,16E-04                 | 2,76E-02                     | 7,95E-01               | -1,26E+00                    |
| DLGAP1      | 6,40E+02    | 1,06E-04                 | 1,81E-02                     | 1,62E+00               | 1,62E+00                     |
| DUSP5P1     | 1,61E+03    | 4,39E-04                 | 4,27E-02                     | 7,76E-01               | -1,29E+00                    |
| EDN1        | 3,29E+02    | 3,67E-04                 | 3,92E-02                     | 5,85E-01               | -1,71E+00                    |
| EDNRB       | 1,43E+03    | 1,68E-05                 | 5,15E-03                     | 1,66E+00               | 1,66E+00                     |
| EEF1G       | 3,09E+03    | 7,33E-05                 | 1,35E-02                     | 6,67E-01               | -1,50E+00                    |
| EFNB2       | 6,58E+03    | 9,82E-05                 | 1,73E-02                     | 1,28E+00               | 1,28E+00                     |
| ELP5        | 9,19E+03    | 4,44E-04                 | 4,28E-02                     | 8,02E-01               | -1,25E+00                    |
| EMID2       | 4,57E+03    | 1,84E-06                 | 9,10E-04                     | 1,28E+00               | 1,28E+00                     |
| ENDOD1      | 1,40E+03    | 2,30E-06                 | 1,02E-03                     | 1,53E+00               | 1,53E+00                     |
| EWSR1       | 2,39E+03    | 6,61E-05                 | 1,28E-02                     | 7,84E-01               | -1,28E+00                    |
| EZR         | 2,23E+03    | 2,42E-04                 | 2,91E-02                     | 1,26E+00               | 1,26E+00                     |
| FAM109A     | 4,24E+02    | 1,14E-04                 | 1,90E-02                     | 1,87E+00               | 1,87E+00                     |
| FAM222A     | 2,49E+03    | 1,32E-04                 | 2,03E-02                     | 1,38E+00               | 1,38E+00                     |
| FAM89B      | 2,34E+03    | 8,52E-07                 | 5,22E-04                     | 1,37E+00               | 1,37E+00                     |
| FBXW7       | 9,20E+03    | 4,55E-05                 | 9,69E-03                     | 8,15E-01               | -1,23E+00                    |
| FGGY        | 3,60E+03    | 8,39E-06                 | 2,86E-03                     | 7,93E-01               | -1,26E+00                    |
| FKBP14      | 4,48E+03    | 3,96E-04                 | 3,99E-02                     | 8,07E-01               | -1,24E+00                    |
| FRMD3       | 5,19E+02    | 1,44E-04                 | 2,14E-02                     | 1,77E+00               | 1,77E+00                     |
| FRMD6       | 1,08E+03    | 3,32E-08                 | 3,64E-05                     | 1,86E+00               | 1,86E+00                     |
| FTH1        | 2,31E+03    | 2,28E-05                 | 5,82E-03                     | 6,92E-01               | -1,44E+00                    |
| FZD10       | 8,70E+02    | 3,79E-04                 | 3,96E-02                     | 2,06E+00               | 2,06E+00                     |
| FZD8        | 6,18E+02    | 2,14E-04                 | 2,75E-02                     | 1,72E+00               | 1,72E+00                     |

|             |          |          |          |          |           |
|-------------|----------|----------|----------|----------|-----------|
| G6PC3       | 2,94E+04 | 5,25E-04 | 4,82E-02 | 8,22E-01 | -1,22E+00 |
| GAPDH       | 5,57E+04 | 1,34E-07 | 1,08E-04 | 8,17E-01 | -1,22E+00 |
| GEMIN4      | 8,10E+01 | 2,69E-04 | 3,14E-02 | 3,05E+00 | 3,05E+00  |
| GFOD2       | 4,05E+02 | 2,37E-04 | 2,90E-02 | 1,70E+00 | 1,70E+00  |
| GNB4        | 4,01E+03 | 2,49E-05 | 6,14E-03 | 1,28E+00 | 1,28E+00  |
| GRHL1       | 1,14E+03 | 1,22E-04 | 1,97E-02 | 7,17E-01 | -1,39E+00 |
| GUSBP9      | 1,42E+04 | 2,44E-04 | 2,92E-02 | 7,56E-01 | -1,32E+00 |
| HES1        | 7,57E+02 | 3,41E-06 | 1,39E-03 | 1,96E+00 | 1,96E+00  |
| HIST1H1D    | 1,02E+04 | 2,13E-04 | 2,75E-02 | 7,42E-01 | -1,35E+00 |
| HIST1H2BC   | 2,45E+03 | 3,14E-06 | 1,34E-03 | 2,25E+00 | 2,25E+00  |
| HIST1H2BD   | 3,58E+04 | 1,21E-42 | 1,85E-38 | 7,25E-01 | -1,38E+00 |
| HIST1H2BK   | 4,45E+02 | 1,50E-04 | 2,19E-02 | 5,74E-01 | -1,74E+00 |
| HIST1H3D    | 2,24E+02 | 5,07E-04 | 4,74E-02 | 4,71E-01 | -2,12E+00 |
| HIST1H3F    | 4,28E+03 | 3,11E-08 | 3,64E-05 | 1,99E+00 | 1,99E+00  |
| HIST1H3G    | 2,42E+03 | 1,67E-04 | 2,32E-02 | 1,78E+00 | 1,78E+00  |
| HIST1H3I    | 3,39E+04 | 1,92E-08 | 2,68E-05 | 6,29E-01 | -1,59E+00 |
| HIST1H3J    | 2,18E+04 | 6,19E-20 | 4,74E-16 | 6,78E-01 | -1,48E+00 |
| HIST1H4B    | 1,09E+04 | 4,23E-10 | 8,10E-07 | 6,14E-01 | -1,63E+00 |
| HIST2H3D    | 3,34E+02 | 1,94E-05 | 5,49E-03 | 4,79E-01 | -2,09E+00 |
| HSPB1       | 4,94E+03 | 2,83E-04 | 3,28E-02 | 1,26E+00 | 1,26E+00  |
| HTRA2       | 1,08E+04 | 1,40E-08 | 2,14E-05 | 7,47E-01 | -1,34E+00 |
| IFT43       | 8,13E+03 | 1,92E-05 | 5,49E-03 | 6,48E-01 | -1,54E+00 |
| INPP5K      | 4,98E+03 | 2,32E-06 | 1,02E-03 | 7,52E-01 | -1,33E+00 |
| INSM2       | 8,71E+02 | 1,63E-04 | 2,29E-02 | 6,71E-01 | -1,49E+00 |
| INSRR       | 6,70E+01 | 2,18E-04 | 2,76E-02 | 3,39E-01 | -2,95E+00 |
| IRAK1BP1    | 1,49E+03 | 7,28E-05 | 1,35E-02 | 7,26E-01 | -1,38E+00 |
| JPH1        | 4,45E+02 | 1,77E-04 | 2,42E-02 | 1,87E+00 | 1,87E+00  |
| KBTBD10     | 1,60E+04 | 1,52E-04 | 2,19E-02 | 7,75E-01 | -1,29E+00 |
| KCNK1       | 1,69E+03 | 1,33E-07 | 1,08E-04 | 6,63E-01 | -1,51E+00 |
| KRTAP19-7   | 1,30E+01 | 4,81E-09 | 8,19E-06 | 6,60E-04 | -1,52E+03 |
| KRTAP5-2    | 9,88E+02 | 1,16E-07 | 1,04E-04 | 1,72E+00 | 1,72E+00  |
| LAMC2       | 5,21E+02 | 3,10E-04 | 3,46E-02 | 6,39E-01 | -1,57E+00 |
| LAMP1       | 1,42E+03 | 4,32E-04 | 4,24E-02 | 1,31E+00 | 1,31E+00  |
| LOC10049940 | 1,04E+03 | 1,09E-06 | 6,16E-04 | 6,10E-01 | -1,64E+00 |
| LOC254100   | 7,54E+02 | 2,13E-05 | 5,71E-03 | 6,24E-01 | -1,60E+00 |
| LOC645513   | 1,16E+03 | 2,22E-05 | 5,82E-03 | 6,66E-01 | -1,50E+00 |
| LOC646471   | 1,69E+03 | 8,26E-05 | 1,49E-02 | 7,51E-01 | -1,33E+00 |
| LOC728392   | 1,36E+04 | 3,09E-05 | 7,40E-03 | 1,39E+00 | 1,39E+00  |
| LUC7L       | 1,19E+04 | 6,00E-05 | 1,20E-02 | 7,23E-01 | -1,38E+00 |
| MATK        | 1,88E+03 | 3,24E-04 | 3,57E-02 | 1,27E+00 | 1,27E+00  |
| MESDC1      | 9,91E+02 | 1,28E-04 | 2,00E-02 | 1,45E+00 | 1,45E+00  |
| MGST3       | 3,69E+04 | 1,03E-04 | 1,80E-02 | 8,23E-01 | -1,22E+00 |
| MIR600HG    | 5,40E+03 | 6,03E-05 | 1,20E-02 | 1,35E+00 | 1,35E+00  |
| MLL5        | 2,30E+04 | 3,95E-17 | 2,02E-13 | 7,89E-01 | -1,27E+00 |
| MXI1        | 1,52E+03 | 2,61E-04 | 3,10E-02 | 6,83E-01 | -1,46E+00 |
| MYEOV2      | 1,40E+03 | 2,30E-04 | 2,87E-02 | 7,42E-01 | -1,35E+00 |
| NAPEPLD     | 1,43E+03 | 3,84E-04 | 3,96E-02 | 7,65E-01 | -1,31E+00 |
| NENF        | 3,13E+03 | 2,30E-06 | 1,02E-03 | 1,31E+00 | 1,31E+00  |
| NFIC        | 2,88E+03 | 3,41E-10 | 7,46E-07 | 1,56E+00 | 1,56E+00  |
| NNAT        | 7,27E+03 | 2,29E-06 | 1,02E-03 | 6,96E-01 | -1,44E+00 |
| NOP10       | 2,06E+03 | 7,29E-05 | 1,35E-02 | 7,45E-01 | -1,34E+00 |
| NUSAP1      | 3,44E+02 | 3,86E-05 | 8,33E-03 | 2,23E+00 | 2,23E+00  |
| OTUB2       | 3,41E+03 | 2,87E-04 | 3,28E-02 | 1,28E+00 | 1,28E+00  |
| PALM3       | 6,60E+02 | 1,42E-04 | 2,13E-02 | 1,79E+00 | 1,79E+00  |
| PCP4        | 5,43E+02 | 3,46E-04 | 3,75E-02 | 5,94E-01 | -1,68E+00 |
| PDE10A      | 2,45E+03 | 5,42E-04 | 4,94E-02 | 1,25E+00 | 1,25E+00  |
| PEX13       | 4,88E+02 | 1,19E-04 | 1,94E-02 | 5,74E-01 | -1,74E+00 |
| PI4K2A      | 2,40E+03 | 1,06E-04 | 1,81E-02 | 1,33E+00 | 1,33E+00  |

|           |          |          |          |          |           |
|-----------|----------|----------|----------|----------|-----------|
| PIK3CD    | 1,09E+03 | 4,02E-04 | 4,02E-02 | 1,39E+00 | 1,39E+00  |
| PION      | 1,18E+02 | 3,51E-04 | 3,78E-02 | 3,36E-01 | -2,97E+00 |
| PITPNM3   | 2,30E+03 | 3,73E-05 | 8,33E-03 | 1,30E+00 | 1,30E+00  |
| PNPLA3    | 9,26E+02 | 5,11E-04 | 4,75E-02 | 1,39E+00 | 1,39E+00  |
| PRPF31    | 1,77E+02 | 3,87E-04 | 3,96E-02 | 4,29E-01 | -2,33E+00 |
| PSMD8     | 1,23E+03 | 3,08E-04 | 3,46E-02 | 7,31E-01 | -1,37E+00 |
| PSMF1     | 6,00E+02 | 1,56E-04 | 2,21E-02 | 5,92E-01 | -1,69E+00 |
| PXDC1     | 7,84E+02 | 2,00E-04 | 2,69E-02 | 1,69E+00 | 1,69E+00  |
| RAB2B     | 1,69E+04 | 6,45E-06 | 2,30E-03 | 7,36E-01 | -1,36E+00 |
| RAB3B     | 1,98E+04 | 3,88E-04 | 3,96E-02 | 1,28E+00 | 1,28E+00  |
| RAB6A     | 3,76E+04 | 2,44E-05 | 6,12E-03 | 8,18E-01 | -1,22E+00 |
| REM2      | 4,16E+03 | 5,06E-07 | 3,69E-04 | 5,89E-01 | -1,70E+00 |
| RET       | 7,76E+02 | 3,76E-04 | 3,96E-02 | 1,36E+00 | 1,36E+00  |
| RGS8      | 1,32E+03 | 2,28E-08 | 2,91E-05 | 2,03E+00 | 2,03E+00  |
| RHOB      | 4,78E+04 | 3,77E-05 | 8,33E-03 | 1,21E+00 | 1,21E+00  |
| RIMKLB    | 1,14E+02 | 3,93E-04 | 3,99E-02 | 3,42E-01 | -2,93E+00 |
| RMRP      | 9,52E+05 | 5,26E-04 | 4,82E-02 | 1,67E+00 | 1,67E+00  |
| RNF157    | 9,99E+03 | 6,13E-07 | 4,27E-04 | 1,28E+00 | 1,28E+00  |
| RNU12     | 7,42E+02 | 2,03E-04 | 2,70E-02 | 5,41E-01 | -1,85E+00 |
| RPS11     | 2,96E+03 | 4,40E-04 | 4,27E-02 | 7,31E-01 | -1,37E+00 |
| RUSC1     | 3,20E+03 | 1,14E-04 | 1,90E-02 | 1,25E+00 | 1,25E+00  |
| SCARNA7   | 1,39E+05 | 1,54E-04 | 2,21E-02 | 7,16E-01 | -1,40E+00 |
| SCARNA9   | 5,32E+04 | 2,35E-16 | 9,01E-13 | 7,23E-01 | -1,38E+00 |
| SDC2      | 6,96E+02 | 1,29E-04 | 2,00E-02 | 6,25E-01 | -1,60E+00 |
| SDHAP1    | 2,12E+03 | 3,86E-05 | 8,33E-03 | 7,90E-01 | -1,27E+00 |
| SIPA1L3   | 4,33E+03 | 1,80E-05 | 5,41E-03 | 1,28E+00 | 1,28E+00  |
| SLC1A3    | 1,26E+03 | 7,79E-07 | 4,97E-04 | 1,75E+00 | 1,75E+00  |
| SLC4A4    | 1,10E+03 | 3,44E-06 | 1,39E-03 | 1,68E+00 | 1,68E+00  |
| SLC7A5    | 1,65E+04 | 1,74E-04 | 2,41E-02 | 1,29E+00 | 1,29E+00  |
| SMA5      | 1,75E+03 | 3,29E-05 | 7,64E-03 | 6,86E-01 | -1,46E+00 |
| SNRPA1    | 2,45E+02 | 1,27E-04 | 2,00E-02 | 4,56E-01 | -2,19E+00 |
| SNRPN     | 4,25E+04 | 1,01E-05 | 3,29E-03 | 8,28E-01 | -1,21E+00 |
| SORD      | 1,81E+03 | 2,41E-04 | 2,91E-02 | 1,29E+00 | 1,29E+00  |
| SOX4      | 1,37E+04 | 2,28E-05 | 5,82E-03 | 1,36E+00 | 1,36E+00  |
| SOX9      | 1,01E+03 | 3,85E-04 | 3,96E-02 | 1,79E+00 | 1,79E+00  |
| ST18      | 1,68E+03 | 9,55E-06 | 3,18E-03 | 6,31E-01 | -1,58E+00 |
| STC1      | 1,10E+03 | 2,71E-05 | 6,59E-03 | 6,14E-01 | -1,63E+00 |
| STX4      | 1,24E+04 | 4,05E-04 | 4,03E-02 | 8,28E-01 | -1,21E+00 |
| SUPT3H    | 1,78E+03 | 3,31E-04 | 3,62E-02 | 7,86E-01 | -1,27E+00 |
| TAC1      | 3,86E+03 | 1,29E-06 | 6,82E-04 | 4,88E-01 | -2,05E+00 |
| TAF7      | 3,77E+04 | 1,04E-06 | 6,14E-04 | 8,29E-01 | -1,21E+00 |
| TBC1D13   | 1,11E+03 | 4,95E-05 | 1,04E-02 | 5,84E-01 | -1,71E+00 |
| TMEM201   | 1,16E+03 | 2,85E-04 | 3,28E-02 | 1,43E+00 | 1,43E+00  |
| TMEM234   | 1,89E+03 | 4,47E-04 | 4,28E-02 | 7,47E-01 | -1,34E+00 |
| TNFRSF12A | 2,40E+03 | 3,20E-05 | 7,54E-03 | 1,34E+00 | 1,34E+00  |
| TNRC18    | 4,58E+03 | 1,90E-05 | 5,49E-03 | 1,27E+00 | 1,27E+00  |
| TPP2      | 1,45E+04 | 2,09E-05 | 5,71E-03 | 8,30E-01 | -1,20E+00 |
| TTC3P1    | 5,12E+03 | 1,24E-05 | 3,96E-03 | 7,60E-01 | -1,32E+00 |
| TUBB      | 1,26E+04 | 1,28E-04 | 2,00E-02 | 1,53E+00 | 1,53E+00  |
| UPF3B     | 5,55E+03 | 1,23E-06 | 6,72E-04 | 7,80E-01 | -1,28E+00 |
| UQCR10    | 3,94E+02 | 1,40E-04 | 2,12E-02 | 1,77E+00 | 1,77E+00  |
| WBP2      | 8,17E+02 | 3,09E-04 | 3,46E-02 | 6,79E-01 | -1,47E+00 |
| ZC3H10    | 1,64E+02 | 4,14E-04 | 4,09E-02 | 3,97E-01 | -2,52E+00 |
| ZNF480    | 3,25E+03 | 5,32E-05 | 1,09E-02 | 7,72E-01 | -1,29E+00 |
| ZNF768    | 1,39E+02 | 2,13E-04 | 2,75E-02 | 1,88E+00 | 1,88E+00  |
| ZNRF3     | 7,38E+02 | 1,43E-05 | 4,47E-03 | 1,67E+00 | 1,67E+00  |



## DOWN-REGULATED GENES

| Gene symbol | Total reads | P-value (GFP vs, DKIN-WT) | FDR step up (GFP vs, DKIN-WT) | Ratio (GFP vs, DKIN-WT) | Fold change (GFP vs, DKIN-WT) |
|-------------|-------------|---------------------------|-------------------------------|-------------------------|-------------------------------|
| ACTR3B      | 9,53E+02    | 2,30E-04                  | 2,87E-02                      | 1,47E+00                | 1,47E+00                      |
| ALDH1B1     | 6,04E+02    | 1,49E-04                  | 2,19E-02                      | 1,59E+00                | 1,59E+00                      |
| ANK2        | 4,47E+04    | 2,05E-04                  | 2,70E-02                      | 1,20E+00                | 1,20E+00                      |
| ATP10B      | 2,19E+02    | 1,18E-04                  | 1,94E-02                      | 1,65E+00                | 1,65E+00                      |
| ATP1A2      | 7,75E+03    | 7,83E-06                  | 2,72E-03                      | 1,66E+00                | 1,66E+00                      |
| ATP7B       | 5,86E+02    | 2,64E-04                  | 3,11E-02                      | 1,55E+00                | 1,55E+00                      |
| BASP1       | 4,37E+04    | 7,68E-07                  | 4,97E-04                      | 1,47E+00                | 1,47E+00                      |
| BIVM        | 5,11E+03    | 8,04E-05                  | 1,47E-02                      | 1,76E+00                | 1,76E+00                      |
| C4orf48     | 2,99E+03    | 3,68E-04                  | 3,92E-02                      | 1,56E+00                | 1,56E+00                      |
| C9orf172    | 2,03E+03    | 1,06E-10                  | 2,72E-07                      | 1,66E+00                | 1,66E+00                      |
| CCND2       | 8,43E+03    | 3,64E-05                  | 8,32E-03                      | 1,36E+00                | 1,36E+00                      |
| CHRD        | 3,73E+02    | 2,35E-04                  | 2,90E-02                      | 1,57E+00                | 1,57E+00                      |
| CPNE5       | 1,54E+03    | 4,97E-04                  | 4,67E-02                      | 1,39E+00                | 1,39E+00                      |
| DLGAP1      | 6,40E+02    | 1,06E-04                  | 1,81E-02                      | 1,62E+00                | 1,62E+00                      |
| EDNRB       | 1,43E+03    | 1,68E-05                  | 5,15E-03                      | 1,66E+00                | 1,66E+00                      |
| EFNB2       | 6,58E+03    | 9,82E-05                  | 1,73E-02                      | 1,28E+00                | 1,28E+00                      |
| EMID2       | 4,57E+03    | 1,84E-06                  | 9,10E-04                      | 1,28E+00                | 1,28E+00                      |
| ENDOD1      | 1,40E+03    | 2,30E-06                  | 1,02E-03                      | 1,53E+00                | 1,53E+00                      |
| EZR         | 2,23E+03    | 2,42E-04                  | 2,91E-02                      | 1,26E+00                | 1,26E+00                      |
| FAM109A     | 4,24E+02    | 1,14E-04                  | 1,90E-02                      | 1,87E+00                | 1,87E+00                      |
| FAM222A     | 2,49E+03    | 1,32E-04                  | 2,03E-02                      | 1,38E+00                | 1,38E+00                      |
| FAM89B      | 2,34E+03    | 8,52E-07                  | 5,22E-04                      | 1,37E+00                | 1,37E+00                      |
| FRMD3       | 5,19E+02    | 1,44E-04                  | 2,14E-02                      | 1,77E+00                | 1,77E+00                      |
| FRMD6       | 1,08E+03    | 3,32E-08                  | 3,64E-05                      | 1,86E+00                | 1,86E+00                      |
| FZD10       | 8,70E+02    | 3,79E-04                  | 3,96E-02                      | 2,06E+00                | 2,06E+00                      |
| FZD8        | 6,18E+02    | 2,14E-04                  | 2,75E-02                      | 1,72E+00                | 1,72E+00                      |
| GEMIN4      | 8,10E+01    | 2,69E-04                  | 3,14E-02                      | 3,05E+00                | 3,05E+00                      |
| GFOD2       | 4,05E+02    | 2,37E-04                  | 2,90E-02                      | 1,70E+00                | 1,70E+00                      |
| GNB4        | 4,01E+03    | 2,49E-05                  | 6,14E-03                      | 1,28E+00                | 1,28E+00                      |
| HES1        | 7,57E+02    | 3,41E-06                  | 1,39E-03                      | 1,96E+00                | 1,96E+00                      |
| HIST1H2BC   | 2,45E+03    | 3,14E-06                  | 1,34E-03                      | 2,25E+00                | 2,25E+00                      |
| HIST1H3F    | 4,28E+03    | 3,11E-08                  | 3,64E-05                      | 1,99E+00                | 1,99E+00                      |
| HIST1H3G    | 2,42E+03    | 1,67E-04                  | 2,32E-02                      | 1,78E+00                | 1,78E+00                      |
| HSPB1       | 4,94E+03    | 2,83E-04                  | 3,28E-02                      | 1,26E+00                | 1,26E+00                      |
| JPH1        | 4,45E+02    | 1,77E-04                  | 2,42E-02                      | 1,87E+00                | 1,87E+00                      |
| KRTAP5-2    | 9,88E+02    | 1,16E-07                  | 1,04E-04                      | 1,72E+00                | 1,72E+00                      |
| LAMP1       | 1,42E+03    | 4,32E-04                  | 4,24E-02                      | 1,31E+00                | 1,31E+00                      |
| LOC728392   | 1,36E+04    | 3,09E-05                  | 7,40E-03                      | 1,39E+00                | 1,39E+00                      |
| MATK        | 1,88E+03    | 3,24E-04                  | 3,57E-02                      | 1,27E+00                | 1,27E+00                      |
| MESDC1      | 9,91E+02    | 1,28E-04                  | 2,00E-02                      | 1,45E+00                | 1,45E+00                      |
| MIR600HG    | 5,40E+03    | 6,03E-05                  | 1,20E-02                      | 1,35E+00                | 1,35E+00                      |
| NENF        | 3,13E+03    | 2,30E-06                  | 1,02E-03                      | 1,31E+00                | 1,31E+00                      |
| NFIC        | 2,88E+03    | 3,41E-10                  | 7,46E-07                      | 1,56E+00                | 1,56E+00                      |
| NUSAP1      | 3,44E+02    | 3,86E-05                  | 8,33E-03                      | 2,23E+00                | 2,23E+00                      |
| OTUB2       | 3,41E+03    | 2,87E-04                  | 3,28E-02                      | 1,28E+00                | 1,28E+00                      |
| PALM3       | 6,60E+02    | 1,42E-04                  | 2,13E-02                      | 1,79E+00                | 1,79E+00                      |
| PDE10A      | 2,45E+03    | 5,42E-04                  | 4,94E-02                      | 1,25E+00                | 1,25E+00                      |
| PI4K2A      | 2,40E+03    | 1,06E-04                  | 1,81E-02                      | 1,33E+00                | 1,33E+00                      |
| PIK3CD      | 1,09E+03    | 4,02E-04                  | 4,02E-02                      | 1,39E+00                | 1,39E+00                      |
| PITPNM3     | 2,30E+03    | 3,73E-05                  | 8,33E-03                      | 1,30E+00                | 1,30E+00                      |
| PNPLA3      | 9,26E+02    | 5,11E-04                  | 4,75E-02                      | 1,39E+00                | 1,39E+00                      |
| PXDC1       | 7,84E+02    | 2,00E-04                  | 2,69E-02                      | 1,69E+00                | 1,69E+00                      |
| RAB3B       | 1,98E+04    | 3,88E-04                  | 3,96E-02                      | 1,28E+00                | 1,28E+00                      |
| RET         | 7,76E+02    | 3,76E-04                  | 3,96E-02                      | 1,36E+00                | 1,36E+00                      |

|           |          |          |          |          |          |
|-----------|----------|----------|----------|----------|----------|
| RGS8      | 1,32E+03 | 2,28E-08 | 2,91E-05 | 2,03E+00 | 2,03E+00 |
| RHOB      | 4,78E+04 | 3,77E-05 | 8,33E-03 | 1,21E+00 | 1,21E+00 |
| RMRP      | 9,52E+05 | 5,26E-04 | 4,82E-02 | 1,67E+00 | 1,67E+00 |
| RNF157    | 9,99E+03 | 6,13E-07 | 4,27E-04 | 1,28E+00 | 1,28E+00 |
| RUSC1     | 3,20E+03 | 1,14E-04 | 1,90E-02 | 1,25E+00 | 1,25E+00 |
| SIPA1L3   | 4,33E+03 | 1,80E-05 | 5,41E-03 | 1,28E+00 | 1,28E+00 |
| SLC1A3    | 1,26E+03 | 7,79E-07 | 4,97E-04 | 1,75E+00 | 1,75E+00 |
| SLC4A4    | 1,10E+03 | 3,44E-06 | 1,39E-03 | 1,68E+00 | 1,68E+00 |
| SLC7A5    | 1,65E+04 | 1,74E-04 | 2,41E-02 | 1,29E+00 | 1,29E+00 |
| SORD      | 1,81E+03 | 2,41E-04 | 2,91E-02 | 1,29E+00 | 1,29E+00 |
| SOX4      | 1,37E+04 | 2,28E-05 | 5,82E-03 | 1,36E+00 | 1,36E+00 |
| SOX9      | 1,01E+03 | 3,85E-04 | 3,96E-02 | 1,79E+00 | 1,79E+00 |
| TMEM201   | 1,16E+03 | 2,85E-04 | 3,28E-02 | 1,43E+00 | 1,43E+00 |
| TNFRSF12A | 2,40E+03 | 3,20E-05 | 7,54E-03 | 1,34E+00 | 1,34E+00 |
| TNRC18    | 4,58E+03 | 1,90E-05 | 5,49E-03 | 1,27E+00 | 1,27E+00 |
| TUBB      | 1,26E+04 | 1,28E-04 | 2,00E-02 | 1,53E+00 | 1,53E+00 |
| UQCR10    | 3,94E+02 | 1,40E-04 | 2,12E-02 | 1,77E+00 | 1,77E+00 |
| ZNF768    | 1,39E+02 | 2,13E-04 | 2,75E-02 | 1,88E+00 | 1,88E+00 |
| ZNRF3     | 7,38E+02 | 1,43E-05 | 4,47E-03 | 1,67E+00 | 1,67E+00 |

#### UP REGULATED GENES

| Gene symbol | Total reads | P-value (GFP vs, DKIN-WT) | FDR step up (GFP vs, DKIN-WT) | Ratio (GFP vs, DKIN-WT) | Fold change (GFP vs, DKIN-WT) |
|-------------|-------------|---------------------------|-------------------------------|-------------------------|-------------------------------|
| ARF4        | 3,96E+04    | 1,86E-07                  | 1,42E-04                      | 7,76E-01                | -1,29E+00                     |
| BBX         | 6,08E+03    | 8,46E-12                  | 2,59E-08                      | 7,20E-01                | -1,39E+00                     |
| BSX         | 1,00E+01    | 5,48E-04                  | 4,95E-02                      | 7,42E-04                | -1,35E+03                     |
| BTN2A1      | 4,82E+03    | 4,71E-04                  | 4,46E-02                      | 8,29E-01                | -1,21E+00                     |
| C1orf213    | 9,11E+02    | 6,96E-05                  | 1,33E-02                      | 5,08E-01                | -1,97E+00                     |
| C21orf91    | 2,56E+03    | 4,08E-06                  | 1,56E-03                      | 7,14E-01                | -1,40E+00                     |
| CCNB1IP1    | 2,66E+03    | 1,06E-07                  | 1,02E-04                      | 7,13E-01                | -1,40E+00                     |
| CHMP1B      | 1,88E+04    | 5,34E-05                  | 1,09E-02                      | 7,75E-01                | -1,29E+00                     |
| CRCP        | 5,84E+02    | 6,16E-05                  | 1,21E-02                      | 5,74E-01                | -1,74E+00                     |
| DANCR       | 4,70E+02    | 3,19E-04                  | 3,54E-02                      | 6,21E-01                | -1,61E+00                     |
| DCAF16      | 2,55E+03    | 2,05E-05                  | 5,71E-03                      | 7,40E-01                | -1,35E+00                     |
| DHRS2       | 4,79E+03    | 2,16E-04                  | 2,76E-02                      | 7,95E-01                | -1,26E+00                     |
| DUSP5P1     | 1,61E+03    | 4,39E-04                  | 4,27E-02                      | 7,76E-01                | -1,29E+00                     |
| EDN1        | 3,29E+02    | 3,67E-04                  | 3,92E-02                      | 5,85E-01                | -1,71E+00                     |
| EEF1G       | 3,09E+03    | 7,33E-05                  | 1,35E-02                      | 6,67E-01                | -1,50E+00                     |
| ELP5        | 9,19E+03    | 4,44E-04                  | 4,28E-02                      | 8,02E-01                | -1,25E+00                     |
| EWSR1       | 2,39E+03    | 6,61E-05                  | 1,28E-02                      | 7,84E-01                | -1,28E+00                     |
| FBXW7       | 9,20E+03    | 4,55E-05                  | 9,69E-03                      | 8,15E-01                | -1,23E+00                     |
| FGGY        | 3,60E+03    | 8,39E-06                  | 2,86E-03                      | 7,93E-01                | -1,26E+00                     |
| FKBP14      | 4,48E+03    | 3,96E-04                  | 3,99E-02                      | 8,07E-01                | -1,24E+00                     |
| FTH1        | 2,31E+03    | 2,28E-05                  | 5,82E-03                      | 6,92E-01                | -1,44E+00                     |
| G6PC3       | 2,94E+04    | 5,25E-04                  | 4,82E-02                      | 8,22E-01                | -1,22E+00                     |
| GAPDH       | 5,57E+04    | 1,34E-07                  | 1,08E-04                      | 8,17E-01                | -1,22E+00                     |
| GRHL1       | 1,14E+03    | 1,22E-04                  | 1,97E-02                      | 7,17E-01                | -1,39E+00                     |
| GUSBP9      | 1,42E+04    | 2,44E-04                  | 2,92E-02                      | 7,56E-01                | -1,32E+00                     |
| HIST1H1D    | 1,02E+04    | 2,13E-04                  | 2,75E-02                      | 7,42E-01                | -1,35E+00                     |
| HIST1H2BD   | 3,58E+04    | 1,21E-42                  | 1,85E-38                      | 7,25E-01                | -1,38E+00                     |
| HIST1H2BK   | 4,45E+02    | 1,50E-04                  | 2,19E-02                      | 5,74E-01                | -1,74E+00                     |
| HIST1H3D    | 2,24E+02    | 5,07E-04                  | 4,74E-02                      | 4,71E-01                | -2,12E+00                     |
| HIST1H3I    | 3,39E+04    | 1,92E-08                  | 2,68E-05                      | 6,29E-01                | -1,59E+00                     |

|             |          |          |          |          |           |
|-------------|----------|----------|----------|----------|-----------|
| HIST1H3J    | 2,18E+04 | 6,19E-20 | 4,74E-16 | 6,78E-01 | -1,48E+00 |
| HIST1H4B    | 1,09E+04 | 4,23E-10 | 8,10E-07 | 6,14E-01 | -1,63E+00 |
| HIST2H3D    | 3,34E+02 | 1,94E-05 | 5,49E-03 | 4,79E-01 | -2,09E+00 |
| HTRA2       | 1,08E+04 | 1,40E-08 | 2,14E-05 | 7,47E-01 | -1,34E+00 |
| IFT43       | 8,13E+03 | 1,92E-05 | 5,49E-03 | 6,48E-01 | -1,54E+00 |
| INPP5K      | 4,98E+03 | 2,32E-06 | 1,02E-03 | 7,52E-01 | -1,33E+00 |
| INSM2       | 8,71E+02 | 1,63E-04 | 2,29E-02 | 6,71E-01 | -1,49E+00 |
| INSRR       | 6,70E+01 | 2,18E-04 | 2,76E-02 | 3,39E-01 | -2,95E+00 |
| IRAK1BP1    | 1,49E+03 | 7,28E-05 | 1,35E-02 | 7,26E-01 | -1,38E+00 |
| KBTBD10     | 1,60E+04 | 1,52E-04 | 2,19E-02 | 7,75E-01 | -1,29E+00 |
| KCNK1       | 1,69E+03 | 1,33E-07 | 1,08E-04 | 6,63E-01 | -1,51E+00 |
| KRTAP19-7   | 1,30E+01 | 4,81E-09 | 8,19E-06 | 6,60E-04 | -1,52E+03 |
| LAMC2       | 5,21E+02 | 3,10E-04 | 3,46E-02 | 6,39E-01 | -1,57E+00 |
| LOC10049940 | 1,04E+03 | 1,09E-06 | 6,16E-04 | 6,10E-01 | -1,64E+00 |
| LOC254100   | 7,54E+02 | 2,13E-05 | 5,71E-03 | 6,24E-01 | -1,60E+00 |
| LOC645513   | 1,16E+03 | 2,22E-05 | 5,82E-03 | 6,66E-01 | -1,50E+00 |
| LOC646471   | 1,69E+03 | 8,26E-05 | 1,49E-02 | 7,51E-01 | -1,33E+00 |
| LUC7L       | 1,19E+04 | 6,00E-05 | 1,20E-02 | 7,23E-01 | -1,38E+00 |
| MGST3       | 3,69E+04 | 1,03E-04 | 1,80E-02 | 8,23E-01 | -1,22E+00 |
| MLL5        | 2,30E+04 | 3,95E-17 | 2,02E-13 | 7,89E-01 | -1,27E+00 |
| MXI1        | 1,52E+03 | 2,61E-04 | 3,10E-02 | 6,83E-01 | -1,46E+00 |
| MYEOV2      | 1,40E+03 | 2,30E-04 | 2,87E-02 | 7,42E-01 | -1,35E+00 |
| NAPEPLD     | 1,43E+03 | 3,84E-04 | 3,96E-02 | 7,65E-01 | -1,31E+00 |
| NNAT        | 7,27E+03 | 2,29E-06 | 1,02E-03 | 6,96E-01 | -1,44E+00 |
| NOP10       | 2,06E+03 | 7,29E-05 | 1,35E-02 | 7,45E-01 | -1,34E+00 |
| PCP4        | 5,43E+02 | 3,46E-04 | 3,75E-02 | 5,94E-01 | -1,68E+00 |
| PEX13       | 4,88E+02 | 1,19E-04 | 1,94E-02 | 5,74E-01 | -1,74E+00 |
| PION        | 1,18E+02 | 3,51E-04 | 3,78E-02 | 3,36E-01 | -2,97E+00 |
| PRPF31      | 1,77E+02 | 3,87E-04 | 3,96E-02 | 4,29E-01 | -2,33E+00 |
| PSMD8       | 1,23E+03 | 3,08E-04 | 3,46E-02 | 7,31E-01 | -1,37E+00 |
| PSMF1       | 6,00E+02 | 1,56E-04 | 2,21E-02 | 5,92E-01 | -1,69E+00 |
| RAB2B       | 1,69E+04 | 6,45E-06 | 2,30E-03 | 7,36E-01 | -1,36E+00 |
| RAB6A       | 3,76E+04 | 2,44E-05 | 6,12E-03 | 8,18E-01 | -1,22E+00 |
| REM2        | 4,16E+03 | 5,06E-07 | 3,69E-04 | 5,89E-01 | -1,70E+00 |
| RIMKLB      | 1,14E+02 | 3,93E-04 | 3,99E-02 | 3,42E-01 | -2,93E+00 |
| RNU12       | 7,42E+02 | 2,03E-04 | 2,70E-02 | 5,41E-01 | -1,85E+00 |
| RPS11       | 2,96E+03 | 4,40E-04 | 4,27E-02 | 7,31E-01 | -1,37E+00 |
| SCARNA7     | 1,39E+05 | 1,54E-04 | 2,21E-02 | 7,16E-01 | -1,40E+00 |
| SCARNA9     | 5,32E+04 | 2,35E-16 | 9,01E-13 | 7,23E-01 | -1,38E+00 |
| SDC2        | 6,96E+02 | 1,29E-04 | 2,00E-02 | 6,25E-01 | -1,60E+00 |
| SDHAP1      | 2,12E+03 | 3,86E-05 | 8,33E-03 | 7,90E-01 | -1,27E+00 |
| SMA5        | 1,75E+03 | 3,29E-05 | 7,64E-03 | 6,86E-01 | -1,46E+00 |
| SNRPA1      | 2,45E+02 | 1,27E-04 | 2,00E-02 | 4,56E-01 | -2,19E+00 |
| SNRPN       | 4,25E+04 | 1,01E-05 | 3,29E-03 | 8,28E-01 | -1,21E+00 |
| ST18        | 1,68E+03 | 9,55E-06 | 3,18E-03 | 6,31E-01 | -1,58E+00 |
| STC1        | 1,10E+03 | 2,71E-05 | 6,59E-03 | 6,14E-01 | -1,63E+00 |
| STX4        | 1,24E+04 | 4,05E-04 | 4,03E-02 | 8,28E-01 | -1,21E+00 |
| SUPT3H      | 1,78E+03 | 3,31E-04 | 3,62E-02 | 7,86E-01 | -1,27E+00 |
| TAC1        | 3,86E+03 | 1,29E-06 | 6,82E-04 | 4,88E-01 | -2,05E+00 |
| TAF7        | 3,77E+04 | 1,04E-06 | 6,14E-04 | 8,29E-01 | -1,21E+00 |
| TBC1D13     | 1,11E+03 | 4,95E-05 | 1,04E-02 | 5,84E-01 | -1,71E+00 |
| TMEM234     | 1,89E+03 | 4,47E-04 | 4,28E-02 | 7,47E-01 | -1,34E+00 |
| TPP2        | 1,45E+04 | 2,09E-05 | 5,71E-03 | 8,30E-01 | -1,20E+00 |
| TTC3P1      | 5,12E+03 | 1,24E-05 | 3,96E-03 | 7,60E-01 | -1,32E+00 |
| UPF3B       | 5,55E+03 | 1,23E-06 | 6,72E-04 | 7,80E-01 | -1,28E+00 |
| WBP2        | 8,17E+02 | 3,09E-04 | 3,46E-02 | 6,79E-01 | -1,47E+00 |
| ZC3H10      | 1,64E+02 | 4,14E-04 | 4,09E-02 | 3,97E-01 | -2,52E+00 |
| ZNF480      | 3,25E+03 | 5,32E-05 | 1,09E-02 | 7,72E-01 | -1,29E+00 |

**Table S3: Table showing the list of genes whose expression changes were linked to the kinase activity.** To this purpose, genes with modified expression between [GFP and Kin-rDCLK3<sup>WT</sup>] and [Kin-rDCLK3<sup>WT</sup> and Kin-rDLK3<sup>K543M</sup>] were selected. Filtering of data from comparison between GFP and Kin-rDCLK3<sup>WT</sup> (FC>1.1, adjusted p<0.0009, FDR<0.05) selected 275 genes of interest. This list of significantly changed genes was crossed with the list of genes (Table S4) also changed between Kin-rDCLK3<sup>WT</sup> and Kin-rDCLK3<sup>K543M</sup> after infection of human striatal neurons (FC>1.1, adjusted p<0.002, FDR<0.05; 371 genes). These genes were considered to be regulated through a kinase –dependent mechanism (see Table S5).

Supplemental Table S3

Galvan et al.

list of genes from GFP vs, kin-DCLK3 (WT) for search of kinase specific effects

| Gene symbol | Total reads | P-value (GFP vs, KIN-WT) | FDR step up (GFP vs, KIN-WT) | Ratio (GFP vs, KIN-WT) | FC>1.1, adjusted p<0.0009, FDR<0.05, 275 genes | FC>1.1, adjusted p<0.002, FDR<0.05; 371 genes     |
|-------------|-------------|--------------------------|------------------------------|------------------------|------------------------------------------------|---------------------------------------------------|
|             |             |                          |                              |                        | Fold change (GFP vs, KIN-WT)                   | Fold change (KIN-WT vs, KIN-K543M) [see table S4] |
| ABTB2       | 1,04E+03    | 9,09E-05                 | 1,24E-02                     | 1,46E+00               | 1,46E+00                                       | not found                                         |
| ACAD9       | 1,87E+03    | 6,03E-05                 | 1,00E-02                     | 7,51E-01               | -1,33E+00                                      | 1,37E+00                                          |
| ADAMTS6     | 3,20E+03    | 6,19E-05                 | 1,01E-02                     | 7,27E-01               | -1,38E+00                                      | 1,38E+00                                          |
| AKAP12      | 6,55E+03    | 6,55E-04                 | 4,26E-02                     | 1,27E+00               | 1,27E+00                                       | not found                                         |
| ALDH1B1     | 1,09E+03    | 7,54E-04                 | 4,61E-02                     | 1,46E+00               | 1,46E+00                                       | not found                                         |
| ANK2        | 8,29E+04    | 4,46E-04                 | 3,38E-02                     | 1,23E+00               | 1,23E+00                                       | -1,22E+00                                         |
| APBB3       | 4,35E+03    | 2,08E-06                 | 1,05E-03                     | 7,87E-01               | -1,27E+00                                      | 1,19E+00                                          |
| ARID2       | 5,05E+03    | 2,14E-05                 | 4,84E-03                     | 8,35E-01               | -1,20E+00                                      | not found                                         |
| ATF2        | 1,40E+04    | 3,76E-04                 | 3,07E-02                     | 8,09E-01               | -1,24E+00                                      | not found                                         |
| ATP1A2      | 1,50E+04    | 4,35E-04                 | 3,36E-02                     | 1,62E+00               | 1,62E+00                                       | not found                                         |
| ATP5E       | 2,68E+04    | 5,26E-04                 | 3,73E-02                     | 8,16E-01               | -1,23E+00                                      | not found                                         |
| ATP7B       | 1,07E+03    | 6,02E-06                 | 2,21E-03                     | 1,51E+00               | 1,51E+00                                       | not found                                         |
| BASP1       | 4,14E+04    | 8,06E-07                 | 4,65E-04                     | 1,48E+00               | 1,48E+00                                       | not found                                         |
| BBX         | 9,98E+03    | 4,45E-18                 | 1,80E-14                     | 7,41E-01               | -1,35E+00                                      | 1,44E+00                                          |
| BLCAP       | 1,67E+03    | 7,33E-06                 | 2,42E-03                     | 6,98E-01               | -1,43E+00                                      | not found                                         |
| BMF         | 1,15E+03    | 1,36E-08                 | 1,38E-05                     | 5,78E-01               | -1,73E+00                                      | 1,52E+00                                          |
| BOD1L1      | 5,93E+03    | 3,21E-06                 | 1,37E-03                     | 1,21E+00               | 1,21E+00                                       | 1,18E+00                                          |
| BTBD9       | 2,32E+03    | 5,29E-04                 | 3,74E-02                     | 5,11E-01               | -1,96E+00                                      | 2,38E+00                                          |
| C10orf88    | 2,43E+03    | 5,20E-04                 | 3,70E-02                     | 8,22E-01               | -1,22E+00                                      | not found                                         |
| C17orf49    | 7,61E+03    | 1,90E-05                 | 4,58E-03                     | 8,31E-01               | -1,20E+00                                      | not found                                         |
| C1orf213    | 8,87E+02    | 4,60E-04                 | 3,39E-02                     | 5,06E-01               | -1,98E+00                                      | -1,84E+00                                         |
| C20orf112   | 4,14E+04    | 2,51E-04                 | 2,42E-02                     | 8,41E-01               | -1,19E+00                                      | not found                                         |
| C21orf91    | 4,94E+03    | 2,70E-09                 | 3,96E-06                     | 7,33E-01               | -1,36E+00                                      | not found                                         |
| C22orf32    | 1,12E+04    | 1,18E-05                 | 3,35E-03                     | 6,84E-01               | -1,46E+00                                      | not found                                         |
| C4orf48     | 3,47E+03    | 2,78E-04                 | 2,51E-02                     | 1,58E+00               | 1,58E+00                                       | not found                                         |
| C9orf172    | 1,87E+03    | 2,44E-09                 | 3,95E-06                     | 1,66E+00               | 1,66E+00                                       | not found                                         |
| CCDC144C    | 4,37E+02    | 8,15E-04                 | 4,89E-02                     | 6,04E-01               | -1,65E+00                                      | not found                                         |
| CCND2       | 1,32E+04    | 3,19E-05                 | 6,29E-03                     | 1,31E+00               | 1,31E+00                                       | not found                                         |
| CD27-AS1    | 2,42E+02    | 7,28E-04                 | 4,47E-02                     | 5,09E-01               | -1,96E+00                                      | not found                                         |
| CD3EAP      | 1,36E+03    | 2,80E-04                 | 2,51E-02                     | 1,43E+00               | 1,43E+00                                       | not found                                         |
| CDIPT       | 2,32E+04    | 9,65E-05                 | 1,25E-02                     | 7,98E-01               | -1,25E+00                                      | not found                                         |
| CDKN3       | 2,21E+03    | 6,44E-04                 | 4,21E-02                     | 1,27E+00               | 1,27E+00                                       | not found                                         |
| CEP44       | 5,72E+02    | 1,39E-04                 | 1,58E-02                     | 5,85E-01               | -1,71E+00                                      | not found                                         |
| CHMP1B      | 1,87E+04    | 4,45E-05                 | 8,00E-03                     | 7,74E-01               | -1,29E+00                                      | not found                                         |
| CLK4        | 8,03E+02    | 5,43E-04                 | 3,77E-02                     | 7,67E-01               | -1,30E+00                                      | not found                                         |
| CLN3        | 2,02E+03    | 1,21E-04                 | 1,42E-02                     | 7,61E-01               | -1,31E+00                                      | not found                                         |
| COL6A2      | 1,03E+04    | 5,66E-04                 | 3,90E-02                     | 1,35E+00               | 1,35E+00                                       | not found                                         |
| COX17       | 8,74E+03    | 6,80E-04                 | 4,35E-02                     | 7,27E-01               | -1,38E+00                                      | not found                                         |
| CPSF6       | 1,09E+04    | 1,14E-04                 | 1,38E-02                     | 1,62E-01               | -6,19E+00                                      | not found                                         |
| CREBRF      | 5,48E+03    | 2,70E-04                 | 2,51E-02                     | 7,15E-01               | -1,40E+00                                      | not found                                         |
| CRMP1       | 1,14E+05    | 3,93E-05                 | 7,38E-03                     | 1,22E+00               | 1,22E+00                                       | not found                                         |
| DAGLA       | 4,56E+03    | 4,90E-04                 | 3,55E-02                     | 1,22E+00               | 1,22E+00                                       | not found                                         |
| DCAF13P3    | 4,81E+03    | 1,26E-04                 | 1,48E-02                     | 8,08E-01               | -1,24E+00                                      | 1,24E+00                                          |
| DCAF16      | 4,87E+03    | 3,16E-05                 | 6,29E-03                     | 8,34E-01               | -1,20E+00                                      | not found                                         |
| DDT         | 2,05E+03    | 8,23E-05                 | 1,18E-02                     | 7,40E-01               | -1,35E+00                                      | not found                                         |

|           |          |          |          |          |           |             |
|-----------|----------|----------|----------|----------|-----------|-------------|
| DHRS2     | 4,78E+03 | 1,73E-05 | 4,30E-03 | 7,74E-01 | -1,29E+00 | not found   |
| DLG5      | 3,03E+04 | 7,03E-04 | 4,45E-02 | 1,18E+00 | 1,18E+00  | not found   |
| DLGAP1    | 6,11E+02 | 1,05E-04 | 1,30E-02 | 1,62E+00 | 1,62E+00  | not found   |
| DNAJC12   | 1,63E+04 | 1,76E-12 | 4,73E-09 | 8,26E-01 | -1,21E+00 | not found   |
| DOK3      | 1,26E+02 | 1,16E-04 | 1,38E-02 | 2,41E+00 | 2,41E+00  | not found   |
| DPY30     | 8,92E+03 | 3,13E-04 | 2,66E-02 | 7,49E-01 | -1,34E+00 | not found   |
| DYNC1H1   | 2,21E+04 | 2,86E-04 | 2,54E-02 | 1,25E+00 | 1,25E+00  | not found   |
| DZIP3     | 3,53E+04 | 1,46E-05 | 3,70E-03 | 8,08E-01 | -1,24E+00 | not found   |
| E2F7      | 8,40E+01 | 6,72E-04 | 4,34E-02 | 3,43E+00 | 3,43E+00  | not found   |
| EDC3      | 5,85E+03 | 2,98E-04 | 2,58E-02 | 8,71E-01 | -1,15E+00 | not found   |
| EDNRB     | 2,81E+03 | 4,39E-04 | 3,36E-02 | 1,66E+00 | 1,66E+00  | not found   |
| EFNB2     | 7,45E+03 | 4,20E-05 | 7,80E-03 | 1,26E+00 | 1,26E+00  | 1,24E+00    |
| ELP5      | 8,95E+03 | 1,71E-04 | 1,85E-02 | 7,96E-01 | -1,26E+00 | not found   |
| ENDOD1    | 2,47E+03 | 4,08E-07 | 2,44E-04 | 1,51E+00 | 1,51E+00  | not found   |
| ENTPD2    | 1,10E+02 | 4,45E-05 | 8,00E-03 | 4,52E+00 | 4,52E+00  | -4,88E+00   |
| ERH       | 1,39E+04 | 1,65E-04 | 1,81E-02 | 5,92E-01 | -1,69E+00 | not found   |
| EZR       | 4,75E+03 | 2,08E-06 | 1,05E-03 | 1,26E+00 | 1,26E+00  | 1,31E+00    |
| F2R       | 2,66E+03 | 6,83E-05 | 1,05E-02 | 1,31E+00 | 1,31E+00  | not found   |
| FAM109A   | 7,82E+02 | 1,44E-04 | 1,61E-02 | 1,64E+00 | 1,64E+00  | not found   |
| FAM163A   | 2,18E+02 | 4,11E-04 | 3,27E-02 | 4,55E-01 | -2,20E+00 | not found   |
| FAM89B    | 4,56E+03 | 8,29E-05 | 1,18E-02 | 1,35E+00 | 1,35E+00  | not found   |
| FARP2     | 1,11E+03 | 2,11E-07 | 1,31E-04 | 6,08E-01 | -1,64E+00 | not found   |
| FBLN1     | 4,19E+02 | 4,91E-05 | 8,55E-03 | 2,19E+00 | 2,19E+00  | not found   |
| FBXW7     | 1,69E+04 | 6,50E-06 | 2,28E-03 | 7,96E-01 | -1,26E+00 | not found   |
| FEZF1-AS1 | 1,33E+03 | 2,24E-06 | 1,07E-03 | 6,01E-01 | -1,66E+00 | 1,56E+00    |
| FGD5      | 1,25E+03 | 4,13E-04 | 3,27E-02 | 1,33E+00 | 1,33E+00  | -1,32E+00   |
| FGFBP3    | 1,61E+03 | 4,80E-04 | 3,51E-02 | 1,77E+00 | 1,77E+00  | not found   |
| FGGY      | 7,02E+03 | 9,12E-06 | 2,78E-03 | 8,13E-01 | -1,23E+00 | not found   |
| FHOD3     | 5,23E+03 | 1,97E-04 | 2,05E-02 | 1,38E+00 | 1,38E+00  | not found   |
| FKBP14    | 4,43E+03 | 2,76E-04 | 2,51E-02 | 8,14E-01 | -1,23E+00 | 1,43E+00    |
| FLJ43663  | 9,75E+02 | 5,75E-04 | 3,90E-02 | 6,58E-01 | -1,52E+00 | not found   |
| FRMD6     | 1,75E+03 | 5,42E-04 | 3,77E-02 | 1,71E+00 | 1,71E+00  | not found   |
| FZD10     | 8,70E+02 | 2,98E-04 | 2,58E-02 | 2,06E+00 | 2,06E+00  | not found   |
| FZD4      | 6,72E+02 | 5,75E-04 | 3,90E-02 | 1,47E+00 | 1,47E+00  | not found   |
| FZD7      | 2,71E+03 | 8,17E-04 | 4,89E-02 | 1,41E+00 | 1,41E+00  | not found   |
| FZD8      | 6,24E+02 | 2,54E-04 | 2,43E-02 | 1,74E+00 | 1,74E+00  | not found   |
| G6PC3     | 2,92E+04 | 3,30E-04 | 2,80E-02 | 8,19E-01 | -1,22E+00 | not found   |
| GABBR1    | 1,44E+05 | 2,04E-04 | 2,07E-02 | 8,43E-01 | -1,19E+00 | not found   |
| GNAI3     | 5,17E+03 | 4,70E-35 | 3,80E-31 | 8,73E+00 | 8,73E+00  | -1,46E+00   |
| GOLGA1    | 3,22E+03 | 7,85E-05 | 1,15E-02 | 8,15E-01 | -1,23E+00 | not found   |
| GRHL1     | 1,97E+03 | 4,92E-05 | 8,55E-03 | 7,21E-01 | -1,39E+00 | not found   |
| GUSBP4    | 1,29E+03 | 1,32E-05 | 3,56E-03 | 6,61E-01 | -1,51E+00 | not found   |
| HAPLN3    | 6,35E+02 | 3,43E-04 | 2,83E-02 | 1,58E+00 | 1,58E+00  | not found   |
| HES1      | 1,14E+03 | 1,47E-05 | 3,70E-03 | 1,79E+00 | 1,79E+00  | not found   |
| HIP1R     | 5,73E+03 | 2,89E-04 | 2,55E-02 | 7,80E-01 | -1,28E+00 | not found   |
| HIST1H1D  | 1,01E+04 | 2,01E-04 | 2,06E-02 | 7,43E-01 | -1,35E+00 | 1,69E+00    |
| HIST1H2AG | 6,16E+03 | 7,11E-04 | 4,45E-02 | 1,39E+00 | 1,39E+00  | 2,23E+00    |
| HIST1H2BC | 2,41E+03 | 1,61E-06 | 8,98E-04 | 2,31E+00 | 2,31E+00  | not found   |
| HIST1H2BD | 3,52E+04 | 6,77E-42 | 1,09E-37 | 7,25E-01 | -1,38E+00 | 4,67E+00    |
| HIST1H2BN | 1,23E+04 | 4,85E-04 | 3,53E-02 | 8,19E-01 | -1,22E+00 | not found   |
| HIST1H3F  | 4,28E+03 | 4,24E-08 | 3,42E-05 | 1,98E+00 | 1,98E+00  | not found   |
| HIST1H3G  | 2,41E+03 | 2,20E-04 | 2,20E-02 | 1,75E+00 | 1,75E+00  | 4,32E+00    |
| HIST1H3I  | 3,32E+04 | 1,81E-08 | 1,62E-05 | 6,29E-01 | -1,59E+00 | 1,333020769 |
| HIST1H3J  | 2,16E+04 | 1,49E-20 | 8,03E-17 | 6,78E-01 | -1,47E+00 | 1,40E+00    |
| HIST1H4B  | 1,04E+04 | 3,14E-09 | 4,16E-06 | 6,22E-01 | -1,61E+00 | 1,60E+00    |
| HIST2H3D  | 3,26E+02 | 9,88E-05 | 1,26E-02 | 4,95E-01 | -2,02E+00 | 1,81E+00    |

|              |          |          |          |          |           |           |
|--------------|----------|----------|----------|----------|-----------|-----------|
| HMG20A       | 2,34E+04 | 2,22E-04 | 2,20E-02 | 9,23E-01 | -1,08E+00 | not found |
| HNRNPH1      | 1,09E+04 | 1,23E-05 | 3,42E-03 | 1,40E+00 | 1,40E+00  | not found |
| HS3ST3A1     | 3,52E+02 | 5,71E-04 | 3,90E-02 | 2,12E+00 | 2,12E+00  | not found |
| HSD17B7      | 1,18E+04 | 2,36E-06 | 1,09E-03 | 8,35E-01 | -1,20E+00 | -1,21E+00 |
| HTRA2        | 1,05E+04 | 1,28E-07 | 8,59E-05 | 7,48E-01 | -1,34E+00 | not found |
| IFI27L2      | 5,83E+02 | 7,26E-04 | 4,47E-02 | 6,35E-01 | -1,58E+00 | not found |
| IFT43        | 7,90E+03 | 1,36E-05 | 3,59E-03 | 6,41E-01 | -1,56E+00 | not found |
| ING3         | 3,48E+03 | 2,78E-04 | 2,51E-02 | 7,90E-01 | -1,27E+00 | not found |
| INSM2        | 8,58E+02 | 1,31E-04 | 1,52E-02 | 6,64E-01 | -1,51E+00 | 1,42E+00  |
| IQCB1        | 3,95E+03 | 1,42E-04 | 1,60E-02 | 7,35E-01 | -1,36E+00 | not found |
| ITGA6        | 5,93E+02 | 6,28E-05 | 1,01E-02 | 2,05E+00 | 2,05E+00  | not found |
| ITGAV        | 5,24E+03 | 9,07E-05 | 1,24E-02 | 1,24E+00 | 1,24E+00  | not found |
| JHDM1D       | 2,34E+03 | 5,11E-05 | 8,78E-03 | 7,41E-01 | -1,35E+00 | 1,30E+00  |
| KBTBD10      | 1,52E+04 | 1,10E-04 | 1,35E-02 | 7,68E-01 | -1,30E+00 | not found |
| KIAA1161     | 1,02E+03 | 1,16E-04 | 1,38E-02 | 1,45E+00 | 1,45E+00  | not found |
| KIAA1324     | 3,08E+03 | 3,89E-05 | 7,38E-03 | 7,63E-01 | -1,31E+00 | not found |
| KLHL3        | 3,47E+03 | 3,19E-05 | 6,29E-03 | 7,70E-01 | -1,30E+00 | not found |
| KRTAP5-2     | 6,22E+02 | 1,77E-04 | 1,91E-02 | 1,63E+00 | 1,63E+00  | not found |
| LAMC1        | 1,08E+04 | 4,24E-04 | 3,32E-02 | 1,41E+00 | 1,41E+00  | not found |
| LANCL3       | 8,03E+02 | 2,40E-04 | 2,35E-02 | 1,48E+00 | 1,48E+00  | not found |
| LATS2        | 7,41E+02 | 6,81E-04 | 4,35E-02 | 1,47E+00 | 1,47E+00  | not found |
| LGR4         | 2,75E+03 | 2,77E-06 | 1,24E-03 | 1,41E+00 | 1,41E+00  | not found |
| LHX8         | 1,05E+04 | 1,25E-07 | 8,59E-05 | 7,68E-01 | -1,30E+00 | 1,20E+00  |
| LMBR1L       | 8,35E+03 | 8,49E-04 | 4,99E-02 | 7,50E-01 | -1,33E+00 | not found |
| LOC100133985 | 4,90E+02 | 9,22E-05 | 1,24E-02 | 5,84E-01 | -1,71E+00 | not found |
| LOC100499405 | 3,34E+03 | 1,03E-04 | 1,29E-02 | 6,19E-01 | -1,61E+00 | not found |
| LOC254100    | 7,50E+02 | 2,13E-05 | 4,84E-03 | 6,24E-01 | -1,60E+00 | 1,55E+00  |
| LOC388796    | 4,43E+03 | 1,29E-08 | 1,38E-05 | 7,12E-01 | -1,40E+00 | not found |
| LOC389023    | 7,37E+02 | 1,83E-04 | 1,95E-02 | 7,02E-01 | -1,42E+00 | not found |
| LOC642852    | 5,68E+03 | 3,44E-04 | 2,83E-02 | 1,20E+00 | 1,20E+00  | not found |
| LOC646471    | 1,71E+03 | 9,35E-05 | 1,24E-02 | 7,41E-01 | -1,35E+00 | 1,41E+00  |
| LPL          | 1,53E+03 | 6,70E-05 | 1,05E-02 | 1,52E+00 | 1,52E+00  | not found |
| LPP          | 1,03E+03 | 7,47E-05 | 1,11E-02 | 1,49E+00 | 1,49E+00  | not found |
| LUC7L        | 1,03E+04 | 1,45E-04 | 1,61E-02 | 7,17E-01 | -1,39E+00 | not found |
| MAGI1        | 1,48E+03 | 5,70E-04 | 3,90E-02 | 1,44E+00 | 1,44E+00  | not found |
| MAGOHB       | 1,83E+03 | 3,61E-05 | 7,03E-03 | 6,85E-01 | -1,46E+00 | not found |
| MARCKS       | 1,20E+04 | 5,81E-05 | 9,78E-03 | 1,35E+00 | 1,35E+00  | not found |
| MARVELD1     | 1,02E+03 | 7,05E-04 | 4,45E-02 | 1,41E+00 | 1,41E+00  | not found |
| MATK         | 3,70E+03 | 4,50E-04 | 3,39E-02 | 1,19E+00 | 1,19E+00  | -1,48E+00 |
| MATN2        | 1,32E+03 | 4,34E-04 | 3,36E-02 | 1,36E+00 | 1,36E+00  | 1,64E+00  |
| MAX          | 1,56E+04 | 4,18E-06 | 1,65E-03 | 7,18E-01 | -1,39E+00 | not found |
| MCM2         | 2,99E+02 | 4,33E-04 | 3,36E-02 | 1,80E+00 | 1,80E+00  | not found |
| MDGA1        | 7,83E+03 | 9,24E-05 | 1,24E-02 | 6,75E-01 | -1,48E+00 | 1,62E+00  |
| MESDC1       | 9,32E+02 | 3,04E-05 | 6,29E-03 | 1,50E+00 | 1,50E+00  | not found |
| METRNL       | 2,87E+03 | 2,08E-04 | 2,08E-02 | 1,30E+00 | 1,30E+00  | not found |
| MIR600HG     | 5,21E+03 | 6,79E-05 | 1,05E-02 | 1,35E+00 | 1,35E+00  | not found |
| MNT          | 6,04E+03 | 4,06E-04 | 3,25E-02 | 1,23E+00 | 1,23E+00  | not found |
| MOCS1        | 1,00E+02 | 3,48E-04 | 2,85E-02 | 1,44E-01 | -6,96E+00 | not found |
| MOXD1        | 2,86E+03 | 1,45E-07 | 9,36E-05 | 1,38E+00 | 1,38E+00  | not found |
| MTSS1L       | 2,58E+04 | 1,29E-05 | 3,52E-03 | 1,26E+00 | 1,26E+00  | not found |
| MXI1         | 1,22E+04 | 3,44E-06 | 1,42E-03 | 7,56E-01 | -1,32E+00 | not found |
| MYLIP        | 1,08E+02 | 1,35E-04 | 1,55E-02 | 3,20E+00 | 3,20E+00  | not found |
| MYT1L        | 2,68E+04 | 5,98E-04 | 3,99E-02 | 8,32E-01 | -1,20E+00 | not found |
| NDUFB5       | 1,47E+04 | 2,31E-04 | 2,28E-02 | 7,65E-01 | -1,31E+00 | not found |
| NENF         | 3,07E+03 | 7,99E-06 | 2,56E-03 | 1,30E+00 | 1,30E+00  | not found |
| NFIC         | 2,82E+03 | 1,75E-08 | 1,62E-05 | 1,56E+00 | 1,56E+00  | not found |

|          |          |          |          |          |           |           |
|----------|----------|----------|----------|----------|-----------|-----------|
| NGFR     | 5,30E+02 | 4,92E-04 | 3,55E-02 | 1,81E+00 | 1,81E+00  | not found |
| NGFRAP1  | 5,53E+04 | 2,16E-05 | 4,84E-03 | 8,46E-01 | -1,18E+00 | not found |
| NKD1     | 1,29E+03 | 6,40E-04 | 4,21E-02 | 1,36E+00 | 1,36E+00  | not found |
| NOP10    | 4,09E+04 | 8,08E-06 | 2,56E-03 | 7,30E-01 | -1,37E+00 | not found |
| NOTCH3   | 5,85E+03 | 4,46E-06 | 1,72E-03 | 1,62E+00 | 1,62E+00  | not found |
| NSUN6    | 1,05E+03 | 3,15E-05 | 6,29E-03 | 6,66E-01 | -1,50E+00 | not found |
| NTSR1    | 3,66E+03 | 1,01E-05 | 2,98E-03 | 1,85E+00 | 1,85E+00  | -1,62E+00 |
| OLFM3    | 4,94E+03 | 5,79E-05 | 9,78E-03 | 7,88E-01 | -1,27E+00 | not found |
| OR4F17   | 1,80E+01 | 7,75E-04 | 4,69E-02 | 3,28E-04 | -3,05E+03 | not found |
| OTUB2    | 3,34E+03 | 7,21E-05 | 1,09E-02 | 1,30E+00 | 1,30E+00  | -1,34E+00 |
| PACSLN2  | 1,88E+03 | 6,95E-04 | 4,42E-02 | 1,35E+00 | 1,35E+00  | not found |
| PALD1    | 6,77E+02 | 7,26E-04 | 4,47E-02 | 1,43E+00 | 1,43E+00  | not found |
| PCSK1    | 7,25E+04 | 2,01E-05 | 4,78E-03 | 8,59E-01 | -1,16E+00 | not found |
| PDE10A   | 4,64E+03 | 6,29E-05 | 1,01E-02 | 1,32E+00 | 1,32E+00  | not found |
| PFN2     | 6,99E+04 | 9,88E-05 | 1,26E-02 | 8,83E-01 | -1,13E+00 | 1,11E+00  |
| PGPEP1   | 2,17E+03 | 1,13E-04 | 1,38E-02 | 1,33E+00 | 1,33E+00  | not found |
| PHF20L1  | 6,22E+03 | 9,56E-05 | 1,25E-02 | 6,80E-01 | -1,47E+00 | 1,43E+00  |
| PHF8     | 4,46E+03 | 1,66E-04 | 1,81E-02 | 7,45E-01 | -1,34E+00 | not found |
| PIP5K1C  | 1,26E+04 | 2,42E-05 | 5,22E-03 | 1,17E+00 | 1,17E+00  | not found |
| PLAGL1   | 1,11E+02 | 7,21E-05 | 1,09E-02 | 3,72E-01 | -2,69E+00 | not found |
| PLXNB1   | 7,86E+03 | 2,67E-04 | 2,51E-02 | 8,26E-01 | -1,21E+00 | 1,26E+00  |
| POLE3    | 3,10E+03 | 3,98E-04 | 3,20E-02 | 1,24E+00 | 1,24E+00  | not found |
| POLR2B   | 2,12E+04 | 5,83E-04 | 3,92E-02 | 9,11E-01 | -1,10E+00 | not found |
| POLR2H   | 3,26E+03 | 6,97E-06 | 2,35E-03 | 7,89E-01 | -1,27E+00 | not found |
| PPARA    | 1,07E+03 | 7,70E-04 | 4,67E-02 | 1,31E+00 | 1,31E+00  | not found |
| PPP1R14C | 6,89E+03 | 2,42E-05 | 5,22E-03 | 1,53E+00 | 1,53E+00  | not found |
| PPP1R17  | 3,05E+03 | 3,35E-04 | 2,80E-02 | 7,44E-01 | -1,34E+00 | not found |
| PRR12    | 8,83E+03 | 2,52E-04 | 2,42E-02 | 1,21E+00 | 1,21E+00  | not found |
| PRRC2A   | 3,94E+04 | 2,73E-04 | 2,51E-02 | 1,16E+00 | 1,16E+00  | not found |
| PSME2    | 1,43E+02 | 4,55E-04 | 3,39E-02 | 4,04E-01 | -2,47E+00 | not found |
| PTN      | 2,94E+04 | 2,65E-04 | 2,50E-02 | 1,21E+00 | 1,21E+00  | 1,57E+00  |
| R3HDM1   | 2,97E+04 | 7,84E-04 | 4,73E-02 | 8,45E-01 | -1,18E+00 | not found |
| RAD21    | 4,83E+04 | 3,78E-05 | 7,28E-03 | 8,14E-01 | -1,23E+00 | not found |
| RAD54B   | 1,58E+03 | 4,54E-04 | 3,39E-02 | 7,14E-01 | -1,40E+00 | not found |
| RASGEF1B | 5,80E+03 | 1,33E-08 | 1,38E-05 | 6,90E-01 | -1,45E+00 | not found |
| RBM44    | 7,40E+01 | 7,57E-04 | 4,62E-02 | 2,41E-01 | -4,15E+00 | not found |
| RBMX     | 4,57E+03 | 6,41E-04 | 4,21E-02 | 7,53E-01 | -1,33E+00 | not found |
| REEP1    | 3,49E+04 | 2,73E-04 | 2,51E-02 | 1,18E+00 | 1,18E+00  | not found |
| REM2     | 5,77E+03 | 3,51E-06 | 1,42E-03 | 5,87E-01 | -1,70E+00 | not found |
| RET      | 1,45E+03 | 9,38E-05 | 1,24E-02 | 1,36E+00 | 1,36E+00  | -1,44E+00 |
| RGS8     | 2,23E+03 | 1,10E-09 | 1,98E-06 | 2,03E+00 | 2,03E+00  | not found |
| RIPK1    | 3,51E+02 | 3,34E-04 | 2,80E-02 | 1,97E+00 | 1,97E+00  | not found |
| RMRP     | 9,42E+05 | 5,34E-04 | 3,75E-02 | 1,67E+00 | 1,67E+00  | not found |
| RNF112   | 2,28E+02 | 7,24E-04 | 4,47E-02 | 1,92E+00 | 1,92E+00  | not found |
| RNU12    | 7,27E+02 | 6,21E-05 | 1,01E-02 | 5,39E-01 | -1,85E+00 | 2,18E+00  |
| ROMO1    | 4,43E+03 | 6,88E-06 | 2,35E-03 | 8,01E-01 | -1,25E+00 | not found |
| RPL8     | 2,39E+03 | 2,85E-04 | 2,54E-02 | 1,83E+00 | 1,83E+00  | not found |
| RTN3     | 1,67E+03 | 2,92E-04 | 2,55E-02 | 1,32E+00 | 1,32E+00  | not found |
| SBDSP1   | 5,66E+03 | 3,79E-04 | 3,07E-02 | 7,88E-01 | -1,27E+00 | not found |
| SCARNA7  | 1,38E+05 | 1,27E-04 | 1,48E-02 | 7,14E-01 | -1,40E+00 | not found |
| SCARNA9  | 5,29E+04 | 7,15E-17 | 2,31E-13 | 7,21E-01 | -1,39E+00 | not found |
| SCN8A    | 2,50E+03 | 1,81E-04 | 1,93E-02 | 1,40E+00 | 1,40E+00  | not found |
| SERF2    | 2,58E+02 | 1,01E-04 | 1,27E-02 | 4,74E-01 | -2,11E+00 | not found |
| SFMBT2   | 1,60E+04 | 2,65E-04 | 2,50E-02 | 7,69E-01 | -1,30E+00 | not found |
| SGK223   | 1,41E+03 | 2,23E-05 | 4,93E-03 | 1,49E+00 | 1,49E+00  | not found |
| SHFM1    | 1,11E+04 | 5,34E-06 | 2,00E-03 | 8,20E-01 | -1,22E+00 | not found |



|           |          |          |          |          |           |           |          |
|-----------|----------|----------|----------|----------|-----------|-----------|----------|
| SKP2      | 1,45E+03 | 2,78E-04 | 2,51E-02 | 1,40E+00 | 1,40E+00  | not found |          |
| SLC16A9   | 2,73E+03 | 5,02E-04 | 3,61E-02 | 8,00E-01 | -1,25E+00 |           | 1,35E+00 |
| SLC1A3    | 2,20E+03 | 1,16E-10 | 2,67E-07 | 1,70E+00 | 1,70E+00  |           | 2,22E+00 |
| SLC25A23  | 1,47E+04 | 5,40E-04 | 3,77E-02 | 1,24E+00 | 1,24E+00  | not found |          |
| SLC43A2   | 6,71E+03 | 2,08E-06 | 1,05E-03 | 1,22E+00 | 1,22E+00  | not found |          |
| SLC4A4    | 1,79E+03 | 1,18E-07 | 8,59E-05 | 1,68E+00 | 1,68E+00  | not found |          |
| SLC7A11   | 2,23E+03 | 8,75E-06 | 2,72E-03 | 1,37E+00 | 1,37E+00  | not found |          |
| SMG9      | 3,70E+03 | 7,21E-04 | 4,47E-02 | 1,18E+00 | 1,18E+00  | not found |          |
| SMIM7     | 5,72E+03 | 4,40E-04 | 3,36E-02 | 8,48E-01 | -1,18E+00 |           | 1,25E+00 |
| SNRPN     | 5,15E+04 | 1,14E-04 | 1,38E-02 | 7,77E-01 | -1,29E+00 | not found |          |
| SOX4      | 1,37E+04 | 1,84E-05 | 4,51E-03 | 1,35E+00 | 1,35E+00  | not found |          |
| SOX9      | 2,96E+03 | 2,26E-06 | 1,07E-03 | 1,95E+00 | 1,95E+00  | not found |          |
| SPRED1    | 6,61E+03 | 8,38E-05 | 1,18E-02 | 1,21E+00 | 1,21E+00  | not found |          |
| SST       | 1,06E+04 | 3,41E-04 | 2,83E-02 | 7,74E-01 | -1,29E+00 | not found |          |
| ST18      | 3,05E+03 | 3,02E-08 | 2,57E-05 | 7,05E-01 | -1,42E+00 | not found |          |
| STAC2     | 1,12E+03 | 2,42E-04 | 2,35E-02 | 1,39E+00 | 1,39E+00  | not found |          |
| STAU2     | 7,26E+03 | 5,93E-04 | 3,98E-02 | 8,34E-01 | -1,20E+00 | not found |          |
| STIP1     | 2,68E+04 | 2,71E-05 | 5,68E-03 | 8,02E-01 | -1,25E+00 | not found |          |
| STX4      | 1,23E+04 | 7,48E-05 | 1,11E-02 | 8,25E-01 | -1,21E+00 | not found |          |
| SULT1C4   | 8,44E+02 | 1,63E-04 | 1,81E-02 | 6,59E-01 | -1,52E+00 |           | 1,56E+00 |
| SYMPK     | 2,28E+04 | 6,75E-04 | 4,34E-02 | 8,18E-01 | -1,22E+00 | not found |          |
| SYNDIG1L  | 1,84E+03 | 8,73E-05 | 1,22E-02 | 1,32E+00 | 1,32E+00  | not found |          |
| SYNGR3    | 3,73E+02 | 3,89E-04 | 3,14E-02 | 1,96E+00 | 1,96E+00  | not found |          |
| SYPL2     | 1,20E+01 | 8,43E-04 | 4,97E-02 | 5,83E-04 | -1,72E+03 | not found |          |
| TAF7      | 3,50E+04 | 3,23E-06 | 1,37E-03 | 8,38E-01 | -1,19E+00 | not found |          |
| TIMM17B   | 8,97E+03 | 2,00E-04 | 2,06E-02 | 8,58E-01 | -1,17E+00 | not found |          |
| TIMP4     | 2,69E+02 | 8,11E-05 | 1,18E-02 | 2,09E+00 | 2,09E+00  | not found |          |
| TMEM106C  | 3,60E+04 | 6,77E-05 | 1,05E-02 | 8,11E-01 | -1,23E+00 | not found |          |
| TNFRSF12A | 3,74E+03 | 4,34E-05 | 7,97E-03 | 1,27E+00 | 1,27E+00  | not found |          |
| TNNI1     | 1,64E+03 | 1,13E-05 | 3,27E-03 | 6,46E-01 | -1,55E+00 | not found |          |
| TNRC18    | 4,07E+03 | 3,35E-09 | 4,16E-06 | 1,34E+00 | 1,34E+00  |           | 1,20E+00 |
| TPP2      | 1,42E+04 | 9,89E-06 | 2,96E-03 | 8,25E-01 | -1,21E+00 | not found |          |
| TPRN      | 2,00E+03 | 6,43E-06 | 2,28E-03 | 1,38E+00 | 1,38E+00  | not found |          |
| TPT1-AS1  | 3,16E+03 | 3,02E-04 | 2,60E-02 | 7,02E-01 | -1,43E+00 | not found |          |
| TRA2A     | 4,21E+03 | 9,44E-05 | 1,24E-02 | 7,58E-01 | -1,32E+00 |           | 1,39E+00 |
| TRIM11    | 2,99E+03 | 4,59E-04 | 3,39E-02 | 1,23E+00 | 1,23E+00  | not found |          |
| TSPAN31   | 6,68E+03 | 3,08E-04 | 2,63E-02 | 6,80E-01 | -1,47E+00 | not found |          |
| TSPAN4    | 2,35E+03 | 8,33E-05 | 1,18E-02 | 1,30E+00 | 1,30E+00  | not found |          |
| TTC21A    | 2,65E+02 | 5,20E-04 | 3,70E-02 | 5,21E-01 | -1,92E+00 | not found |          |
| TTC3P1    | 4,98E+03 | 2,50E-05 | 5,31E-03 | 7,58E-01 | -1,32E+00 |           | 1,37E+00 |
| TULP3     | 4,63E+03 | 4,19E-04 | 3,30E-02 | 8,46E-01 | -1,18E+00 |           | 1,24E+00 |
| UBE2V2    | 2,80E+04 | 8,31E-04 | 4,92E-02 | 8,89E-01 | -1,12E+00 | not found |          |
| UBL4A     | 1,59E+03 | 5,82E-04 | 3,92E-02 | 1,31E+00 | 1,31E+00  | not found |          |
| USH1G     | 1,23E+02 | 6,04E-04 | 4,02E-02 | 2,12E+00 | 2,12E+00  | not found |          |
| VPS72     | 2,63E+04 | 4,41E-04 | 3,36E-02 | 8,28E-01 | -1,21E+00 | not found |          |
| VSNL1     | 8,81E+04 | 1,87E-04 | 1,98E-02 | 7,33E-01 | -1,36E+00 | not found |          |
| YPEL3     | 5,69E+03 | 4,67E-04 | 3,43E-02 | 8,50E-01 | -1,18E+00 | not found |          |
| ZDHHC16   | 6,72E+03 | 8,26E-04 | 4,92E-02 | 8,49E-01 | -1,18E+00 | not found |          |
| ZFAND1    | 6,41E+03 | 2,92E-04 | 2,55E-02 | 8,18E-01 | -1,22E+00 | not found |          |
| ZFP36L1   | 2,77E+03 | 6,32E-04 | 4,18E-02 | 1,67E+00 | 1,67E+00  | not found |          |
| ZFP62     | 3,52E+02 | 1,45E-05 | 3,70E-03 | 2,13E+00 | 2,13E+00  | not found |          |
| ZIC3      | 1,35E+04 | 2,08E-04 | 2,08E-02 | 8,88E-01 | -1,13E+00 |           | 1,13E+00 |
| ZNF114    | 3,90E+02 | 2,01E-04 | 2,06E-02 | 1,77E+00 | 1,77E+00  | not found |          |
| ZNF33A    | 3,67E+03 | 4,91E-05 | 8,55E-03 | 7,85E-01 | -1,27E+00 | not found |          |
| ZNF394    | 3,21E+02 | 8,19E-08 | 6,30E-05 | 6,23E-02 | -1,61E+01 |           | 9,45E+00 |
| ZNF490    | 5,15E+03 | 7,09E-04 | 4,45E-02 | 8,78E-01 | -1,14E+00 |           | 1,16E+00 |

|        |          |          |          |          |           |           |
|--------|----------|----------|----------|----------|-----------|-----------|
| ZNF491 | 2,23E+03 | 6,62E-04 | 4,29E-02 | 8,04E-01 | -1,24E+00 | not found |
| ZNF571 | 5,84E+03 | 8,31E-04 | 4,92E-02 | 8,35E-01 | -1,20E+00 | not found |
| ZNF689 | 2,15E+03 | 4,60E-04 | 3,39E-02 | 1,41E+00 | 1,41E+00  | not found |
| ZNF710 | 1,84E+03 | 2,13E-05 | 4,84E-03 | 1,37E+00 | 1,37E+00  | not found |
| ZNF98  | 1,44E+01 | 8,03E-10 | 1,62E-06 | 7,80E-04 | -1,28E+03 | not found |
| ZNRF3  | 1,12E+03 | 1,95E-04 | 2,04E-02 | 1,66E+00 | 1,66E+00  | not found |

**Table S4: Table showing the list of genes statistically modified between Kin-rDCLK3<sup>WT</sup> and Kin-rDCLK3<sup>K543M</sup>.** Transcriptomic analysis has been performed by AmpliSeq on extracts from four culture wells for each group, 12 days after infection. Filtering of data (FC>1.1, adjusted p<0.002, FDR<0.05); identified 371 genes of interest.

**Supplemental Table S4**

**GALVAN et al.**

**List of genes from kin-DCLK3 (WT) vs kin-DCLK3 Dead Kinase (K543M)**

|             |             |                                   |                                       |                                 | FC>1.1, adjusted<br>p<0.0009, FDR<0.05,<br>275 genes |
|-------------|-------------|-----------------------------------|---------------------------------------|---------------------------------|------------------------------------------------------|
| Gene symbol | Total reads | P-value (KIN-WT<br>vs, KIN-K543M) | FDR step up (KIN-WT<br>vs, KIN-K543M) | Ratio (KIN-WT vs,<br>KIN-K543M) | Fold change (KIN-WT<br>vs, KIN-K543M)                |
| A2M         | 4,71E+02    | 2,98E-05                          | 3,62E-03                              | 4,67E+00                        | 4,67E+00                                             |
| A4GALT      | 1,07E+03    | 8,70E-04                          | 4,05E-02                              | 6,83E-01                        | -1,46E+00                                            |
| AARS        | 2,69E+04    | 1,59E-04                          | 1,23E-02                              | 8,14E-01                        | -1,23E+00                                            |
| ABHD6       | 7,49E+03    | 3,58E-04                          | 2,23E-02                              | 8,70E-01                        | -1,15E+00                                            |
| ACAD9       | 1,87E+03    | 1,39E-05                          | 1,96E-03                              | 1,37E+00                        | 1,37E+00                                             |
| ADAM17      | 3,10E+03    | 6,35E-04                          | 3,26E-02                              | 1,54E+00                        | 1,54E+00                                             |
| ADAMTS6     | 3,20E+03    | 4,88E-05                          | 5,19E-03                              | 1,38E+00                        | 1,38E+00                                             |
| ADCY7       | 3,66E+03    | 2,35E-04                          | 1,67E-02                              | 6,58E-01                        | -1,52E+00                                            |
| ADHFE1      | 1,27E+02    | 4,22E-04                          | 2,47E-02                              | 3,08E+00                        | 3,08E+00                                             |
| ADNP2       | 1,68E+03    | 4,79E-04                          | 2,69E-02                              | 8,99E-02                        | -1,11E+01                                            |
| AHSA2       | 9,50E+02    | 2,25E-07                          | 7,74E-05                              | 1,98E+00                        | 1,98E+00                                             |
| AKR7A2      | 2,52E+03    | 2,75E-05                          | 3,39E-03                              | 1,35E+00                        | 1,35E+00                                             |
| ALPL        | 3,11E+02    | 4,86E-04                          | 2,70E-02                              | 1,02E-01                        | -9,81E+00                                            |
| ANK2        | 8,29E+04    | 6,04E-04                          | 3,14E-02                              | 8,17E-01                        | -1,22E+00                                            |
| ANKRD34C    | 1,99E+02    | 1,12E-03                          | 4,85E-02                              | 8,63E-02                        | -1,16E+01                                            |
| ANTXR1      | 2,09E+03    | 1,11E-03                          | 4,85E-02                              | 1,91E+00                        | 1,91E+00                                             |
| ANXA5       | 6,18E+03    | 2,09E-06                          | 4,50E-04                              | 2,03E+00                        | 2,03E+00                                             |
| AP1M1       | 1,87E+04    | 8,36E-04                          | 3,93E-02                              | 8,17E-01                        | -1,22E+00                                            |
| APBB3       | 4,35E+03    | 7,33E-04                          | 3,60E-02                              | 1,19E+00                        | 1,19E+00                                             |
| APP         | 5,55E+03    | 5,12E-04                          | 2,79E-02                              | 1,86E+00                        | 1,86E+00                                             |
| ARGLU1      | 4,77E+03    | 2,87E-04                          | 1,87E-02                              | 1,48E+00                        | 1,48E+00                                             |
| ARHGAP29    | 2,96E+03    | 4,09E-05                          | 4,59E-03                              | 1,61E+00                        | 1,61E+00                                             |
| ARHGEF1     | 8,23E+02    | 1,17E-05                          | 1,76E-03                              | 1,65E+00                        | 1,65E+00                                             |
| ARL13B      | 8,07E+02    | 4,59E-05                          | 4,95E-03                              | 1,63E+00                        | 1,63E+00                                             |
| ARL6IP6     | 3,12E+03    | 2,16E-05                          | 2,77E-03                              | 1,28E+00                        | 1,28E+00                                             |
| ATG16L2     | 2,83E+02    | 4,77E-04                          | 2,69E-02                              | 2,03E+00                        | 2,03E+00                                             |
| ATXN10      | 2,68E+04    | 4,98E-04                          | 2,73E-02                              | 1,25E+00                        | 1,25E+00                                             |
| B2M         | 7,76E+03    | 6,87E-08                          | 3,26E-05                              | 1,73E+00                        | 1,73E+00                                             |
| BAZ1A       | 3,49E+02    | 4,00E-06                          | 7,69E-04                              | 2,41E+00                        | 2,41E+00                                             |
| BBX         | 9,98E+03    | 1,32E-24                          | 5,33E-21                              | 1,44E+00                        | 1,44E+00                                             |
| BCAP29      | 3,66E+03    | 5,67E-04                          | 3,00E-02                              | 1,32E+00                        | 1,32E+00                                             |
| BIRC5       | 2,93E+02    | 3,14E-07                          | 1,02E-04                              | 6,95E+00                        | 6,95E+00                                             |
| BIVM-ERCC5  | 7,64E+03    | 9,10E-04                          | 4,20E-02                              | 1,39E+00                        | 1,39E+00                                             |
| BMF         | 1,15E+03    | 4,64E-06                          | 8,46E-04                              | 1,52E+00                        | 1,52E+00                                             |
| BOD1L1      | 5,93E+03    | 5,97E-05                          | 6,05E-03                              | 1,18E+00                        | 1,18E+00                                             |
| BTBD9       | 2,32E+03    | 1,62E-05                          | 2,24E-03                              | 2,38E+00                        | 2,38E+00                                             |
| C14orf1     | 4,23E+04    | 1,27E-11                          | 1,46E-08                              | 7,44E-01                        | -1,34E+00                                            |
| C16orf3     | 3,31E+02    | 5,40E-04                          | 2,91E-02                              | 1,82E+00                        | 1,82E+00                                             |
| C17orf59    | 1,57E+03    | 2,47E-04                          | 1,67E-02                              | 7,59E-01                        | -1,32E+00                                            |

|          |          |          |          |          |           |
|----------|----------|----------|----------|----------|-----------|
| C1orf106 | 2,11E+02 | 6,25E-06 | 1,04E-03 | 3,52E+00 | 3,52E+00  |
| C1orf213 | 8,87E+02 | 9,97E-04 | 4,48E-02 | 5,43E-01 | -1,84E+00 |
| C2orf72  | 2,46E+03 | 3,70E-05 | 4,24E-03 | 7,68E-01 | -1,30E+00 |
| C7orf50  | 5,53E+03 | 8,27E-04 | 3,91E-02 | 3,89E-01 | -2,57E+00 |
| CA14     | 1,81E+03 | 3,89E-07 | 1,21E-04 | 1,57E+00 | 1,57E+00  |
| CCDC109B | 5,47E+02 | 6,49E-05 | 6,51E-03 | 1,76E+00 | 1,76E+00  |
| CCDC113  | 4,43E+02 | 7,93E-04 | 3,84E-02 | 1,67E+00 | 1,67E+00  |
| CCDC117  | 1,61E+03 | 2,24E-08 | 1,26E-05 | 2,01E+01 | 2,01E+01  |
| CCDC152  | 1,94E+03 | 6,47E-04 | 3,30E-02 | 2,04E+00 | 2,04E+00  |
| CCDC8    | 1,51E+03 | 5,24E-07 | 1,51E-04 | 1,61E+00 | 1,61E+00  |
| CCDC85B  | 8,45E+03 | 1,32E-04 | 1,11E-02 | 8,66E-01 | -1,15E+00 |
| CCNC     | 7,24E+03 | 9,61E-07 | 2,50E-04 | 1,57E+00 | 1,57E+00  |
| CCNE2    | 8,10E+01 | 5,08E-04 | 2,78E-02 | 3,79E+00 | 3,79E+00  |
| CDC45    | 1,73E+02 | 2,58E-05 | 3,23E-03 | 3,70E+00 | 3,70E+00  |
| CDCA8    | 9,20E+01 | 3,03E-04 | 1,94E-02 | 3,81E+00 | 3,81E+00  |
| CDK10    | 1,68E+03 | 2,51E-04 | 1,68E-02 | 1,43E+00 | 1,43E+00  |
| CDK2     | 3,68E+02 | 1,03E-07 | 4,27E-05 | 2,57E+00 | 2,57E+00  |
| CDKN1A   | 3,45E+04 | 2,03E-04 | 1,51E-02 | 7,23E-01 | -1,38E+00 |
| CDKN2C   | 1,73E+02 | 1,08E-07 | 4,27E-05 | 4,39E+00 | 4,39E+00  |
| CDT1     | 2,93E+02 | 1,50E-04 | 1,19E-02 | 2,01E+00 | 2,01E+00  |
| CEBPG    | 4,63E+02 | 1,49E-04 | 1,19E-02 | 1,85E+00 | 1,85E+00  |
| CENPF    | 4,16E+02 | 3,56E-07 | 1,13E-04 | 4,02E+00 | 4,02E+00  |
| CHKB     | 1,01E+03 | 1,17E-04 | 1,01E-02 | 1,54E+00 | 1,54E+00  |
| CHPF     | 1,98E+04 | 1,52E-04 | 1,20E-02 | 1,27E+00 | 1,27E+00  |
| CNOT8    | 4,10E+02 | 2,42E-04 | 1,67E-02 | 1,68E+00 | 1,68E+00  |
| COL3A1   | 1,09E+04 | 9,57E-04 | 4,34E-02 | 3,79E+00 | 3,79E+00  |
| COL5A2   | 9,96E+03 | 4,12E-05 | 4,60E-03 | 1,59E+00 | 1,59E+00  |
| CPSF4    | 3,83E+03 | 2,49E-04 | 1,67E-02 | 1,48E+00 | 1,48E+00  |
| CRISPLD1 | 5,09E+03 | 1,04E-03 | 4,64E-02 | 1,40E+00 | 1,40E+00  |
| CRYAB    | 2,05E+03 | 1,12E-04 | 9,70E-03 | 2,43E+00 | 2,43E+00  |
| CTNNA1   | 7,08E+03 | 9,98E-06 | 1,54E-03 | 1,60E+00 | 1,60E+00  |
| CTSC     | 1,90E+03 | 1,74E-06 | 3,98E-04 | 1,43E+00 | 1,43E+00  |
| CXCR4    | 4,52E+03 | 4,23E-04 | 2,47E-02 | 1,83E+00 | 1,83E+00  |
| CYB5B    | 3,45E+04 | 1,77E-07 | 6,66E-05 | 7,87E-01 | -1,27E+00 |
| CYR61    | 1,44E+03 | 2,91E-04 | 1,87E-02 | 2,14E+00 | 2,14E+00  |
| DARS2    | 5,26E+02 | 3,75E-04 | 2,28E-02 | 1,55E+00 | 1,55E+00  |
| DCAF13P3 | 4,81E+03 | 8,12E-05 | 7,65E-03 | 1,24E+00 | 1,24E+00  |
| DIS3L2   | 6,28E+03 | 2,67E-04 | 1,78E-02 | 1,19E+00 | 1,19E+00  |
| DMTF1    | 5,30E+03 | 3,44E-04 | 2,15E-02 | 1,58E+00 | 1,58E+00  |
| DTL      | 1,11E+02 | 3,03E-05 | 3,63E-03 | 5,77E+00 | 5,77E+00  |
| DTWD2    | 1,17E+03 | 1,68E-05 | 2,27E-03 | 1,47E+00 | 1,47E+00  |
| E2F1     | 1,17E+03 | 5,01E-09 | 3,24E-06 | 1,76E+00 | 1,76E+00  |
| ECM2     | 1,82E+02 | 1,50E-04 | 1,19E-02 | 2,57E+00 | 2,57E+00  |
| EDN1     | 6,52E+02 | 1,37E-04 | 1,13E-02 | 1,66E+00 | 1,66E+00  |
| EFNB2    | 7,45E+03 | 1,88E-04 | 1,42E-02 | 1,24E+00 | 1,24E+00  |
| EGR1     | 7,77E+02 | 2,73E-04 | 1,80E-02 | 1,51E+00 | 1,51E+00  |
| EGR3     | 8,09E+02 | 5,65E-04 | 2,99E-02 | 1,66E+00 | 1,66E+00  |
| EIF3H    | 2,52E+04 | 1,66E-05 | 2,27E-03 | 1,30E+00 | 1,30E+00  |
| ENTPD2   | 1,10E+02 | 3,09E-05 | 3,64E-03 | 2,05E-01 | -4,88E+00 |
| EPHB4    | 9,11E+02 | 4,36E-07 | 1,30E-04 | 1,85E+00 | 1,85E+00  |

|           |          |          |          |          |           |
|-----------|----------|----------|----------|----------|-----------|
| EPS8      | 4,11E+03 | 7,78E-04 | 3,78E-02 | 1,24E+00 | 1,24E+00  |
| ERBB2     | 8,53E+02 | 1,04E-03 | 4,62E-02 | 1,56E+00 | 1,56E+00  |
| ERBB2IP   | 3,12E+03 | 4,54E-04 | 2,60E-02 | 1,25E+00 | 1,25E+00  |
| ERBB4     | 3,64E+03 | 2,25E-04 | 1,61E-02 | 1,34E+00 | 1,34E+00  |
| EZR       | 4,75E+03 | 2,32E-07 | 7,80E-05 | 1,31E+00 | 1,31E+00  |
| FABP3     | 8,17E+03 | 1,36E-05 | 1,94E-03 | 6,70E-01 | -1,49E+00 |
| FAM49A    | 2,97E+04 | 9,61E-04 | 4,35E-02 | 8,50E-01 | -1,18E+00 |
| FBLN5     | 8,38E+03 | 2,37E-04 | 1,67E-02 | 1,65E+00 | 1,65E+00  |
| FEZF1-AS1 | 1,33E+03 | 4,46E-05 | 4,89E-03 | 1,56E+00 | 1,56E+00  |
| FGD5      | 1,25E+03 | 5,54E-04 | 2,96E-02 | 7,57E-01 | -1,32E+00 |
| FKBP14    | 4,43E+03 | 4,27E-10 | 3,63E-07 | 1,43E+00 | 1,43E+00  |
| FLJ20021  | 3,10E+02 | 1,08E-03 | 4,80E-02 | 1,81E+00 | 1,81E+00  |
| FLNA      | 1,02E+04 | 7,85E-08 | 3,62E-05 | 1,69E+00 | 1,69E+00  |
| FOSB      | 1,63E+02 | 8,95E-04 | 4,14E-02 | 2,12E+00 | 2,12E+00  |
| FOXC1     | 2,65E+02 | 6,60E-04 | 3,34E-02 | 2,17E+00 | 2,17E+00  |
| FOXN2     | 7,54E+02 | 2,06E-04 | 1,51E-02 | 1,50E+00 | 1,50E+00  |
| FREM1     | 3,22E+02 | 6,87E-07 | 1,92E-04 | 2,53E+00 | 2,53E+00  |
| FRZB      | 1,44E+03 | 3,09E-08 | 1,66E-05 | 1,81E+00 | 1,81E+00  |
| FZD2      | 1,10E+03 | 7,56E-04 | 3,70E-02 | 2,57E+00 | 2,57E+00  |
| GADD45G   | 4,50E+03 | 2,37E-04 | 1,67E-02 | 6,77E-01 | -1,48E+00 |
| GAS1      | 1,27E+03 | 3,60E-08 | 1,87E-05 | 1,73E+00 | 1,73E+00  |
| GFPT2     | 1,94E+03 | 2,27E-05 | 2,88E-03 | 1,58E+00 | 1,58E+00  |
| GNAI3     | 5,17E+03 | 1,14E-35 | 9,19E-32 | 1,12E-01 | -8,93E+00 |
| GNG5      | 1,44E+03 | 8,42E-05 | 7,77E-03 | 1,96E+00 | 1,96E+00  |
| GOLIM4    | 1,84E+03 | 8,24E-04 | 3,91E-02 | 1,81E+00 | 1,81E+00  |
| GPSM2     | 6,65E+02 | 2,35E-05 | 2,96E-03 | 1,63E+00 | 1,63E+00  |
| GTSE1     | 2,01E+02 | 5,97E-04 | 3,11E-02 | 2,53E+00 | 2,53E+00  |
| HACE1     | 1,69E+03 | 5,62E-06 | 9,66E-04 | 1,48E+00 | 1,48E+00  |
| HEG1      | 4,79E+03 | 8,29E-05 | 7,69E-03 | 1,65E+00 | 1,65E+00  |
| HELLS     | 3,99E+02 | 4,56E-04 | 2,60E-02 | 2,40E+00 | 2,40E+00  |
| HIATL1    | 2,23E+03 | 2,88E-05 | 3,53E-03 | 1,39E+00 | 1,39E+00  |
| HIST1H1B  | 5,46E+02 | 2,91E-04 | 1,87E-02 | 3,26E+00 | 3,26E+00  |
| HIST1H1C  | 3,72E+03 | 1,06E-04 | 9,22E-03 | 1,78E+00 | 1,78E+00  |
| HIST1H1D  | 1,01E+04 | 5,90E-10 | 4,77E-07 | 1,69E+00 | 1,69E+00  |
| HIST1H1E  | 1,82E+04 | 2,27E-08 | 1,26E-05 | 1,58E+00 | 1,58E+00  |
| HIST1H2AB | 9,78E+02 | 4,06E-13 | 5,96E-10 | 2,19E+00 | 2,19E+00  |
| HIST1H2AG | 6,16E+03 | 9,17E-10 | 7,05E-07 | 2,23E+00 | 2,23E+00  |
| HIST1H2AH | 3,62E+03 | 5,75E-05 | 5,96E-03 | 1,81E+00 | 1,81E+00  |
| HIST1H2AI | 2,55E+02 | 1,75E-06 | 3,98E-04 | 2,77E+00 | 2,77E+00  |
| HIST1H2AJ | 4,21E+03 | 9,88E-21 | 2,28E-17 | 2,47E+00 | 2,47E+00  |
| HIST1H2AL | 1,49E+03 | 1,90E-07 | 6,98E-05 | 1,87E+00 | 1,87E+00  |
| HIST1H2AM | 8,60E+03 | 1,54E-06 | 3,71E-04 | 1,56E+00 | 1,56E+00  |
| HIST1H2BD | 3,52E+04 | 4,77E-57 | 7,71E-53 | 1,46E+00 | 1,46E+00  |
| HIST1H2BH | 2,14E+03 | 8,79E-05 | 8,02E-03 | 1,92E+00 | 1,92E+00  |
| HIST1H2BI | 1,81E+03 | 1,24E-08 | 7,41E-06 | 1,94E+00 | 1,94E+00  |
| HIST1H2BM | 2,83E+03 | 3,82E-05 | 4,35E-03 | 1,60E+00 | 1,60E+00  |
| HIST1H2BO | 2,47E+03 | 1,98E-06 | 4,37E-04 | 1,96E+00 | 1,96E+00  |
| HIST1H3B  | 3,90E+03 | 1,94E-11 | 1,96E-08 | 3,81E+00 | 3,81E+00  |
| HIST1H3C  | 1,69E+03 | 1,51E-05 | 2,10E-03 | 2,74E+00 | 2,74E+00  |
| HIST1H3E  | 1,32E+04 | 4,16E-06 | 7,73E-04 | 1,43E+00 | 1,43E+00  |

|           |          |          |          |          |           |
|-----------|----------|----------|----------|----------|-----------|
| HIST1H3G  | 2,41E+03 | 1,03E-07 | 4,27E-05 | 4,32E+00 | 4,32E+00  |
| HIST1H3I  | 3,32E+04 | 4,15E-04 | 2,45E-02 | 1,33E+00 | 1,33E+00  |
| HIST1H3J  | 2,16E+04 | 4,47E-16 | 8,02E-13 | 1,40E+00 | 1,40E+00  |
| HIST1H4A  | 3,86E+03 | 7,39E-21 | 1,99E-17 | 1,86E+00 | 1,86E+00  |
| HIST1H4B  | 1,04E+04 | 4,30E-09 | 2,89E-06 | 1,60E+00 | 1,60E+00  |
| HIST1H4H  | 1,85E+04 | 6,70E-05 | 6,64E-03 | 1,35E+00 | 1,35E+00  |
| HIST1H4L  | 7,83E+02 | 8,19E-04 | 3,91E-02 | 2,50E+00 | 2,50E+00  |
| HIST2H3D  | 3,26E+02 | 3,76E-04 | 2,28E-02 | 1,81E+00 | 1,81E+00  |
| HIVEP2    | 2,90E+03 | 1,57E-04 | 1,22E-02 | 1,49E+00 | 1,49E+00  |
| HJURP     | 3,61E+02 | 9,02E-13 | 1,13E-09 | 4,36E+00 | 4,36E+00  |
| HK2       | 5,75E+02 | 6,07E-06 | 1,02E-03 | 2,06E+00 | 2,06E+00  |
| HMG20B    | 1,04E+03 | 6,42E-04 | 3,28E-02 | 1,49E+00 | 1,49E+00  |
| HSD17B7   | 1,18E+04 | 1,11E-06 | 2,84E-04 | 8,29E-01 | -1,21E+00 |
| HSPG2     | 5,19E+02 | 7,16E-07 | 1,96E-04 | 2,19E+00 | 2,19E+00  |
| IER5L     | 4,20E+03 | 1,09E-03 | 4,81E-02 | 8,15E-01 | -1,23E+00 |
| IFI44L    | 1,17E+02 | 1,50E-04 | 1,19E-02 | 3,91E+00 | 3,91E+00  |
| IFITM10   | 3,04E+03 | 1,41E-05 | 1,98E-03 | 7,17E-01 | -1,40E+00 |
| IFITM3    | 3,25E+03 | 2,08E-06 | 4,50E-04 | 2,30E+00 | 2,30E+00  |
| ILDR2     | 1,91E+03 | 1,37E-04 | 1,13E-02 | 1,38E+00 | 1,38E+00  |
| INHBA     | 4,90E+02 | 2,88E-04 | 1,87E-02 | 3,28E+00 | 3,28E+00  |
| INSM2     | 8,58E+02 | 5,15E-04 | 2,79E-02 | 1,42E+00 | 1,42E+00  |
| INTS7     | 3,00E+03 | 1,31E-04 | 1,11E-02 | 1,28E+00 | 1,28E+00  |
| JAZF1     | 2,40E+04 | 9,71E-04 | 4,38E-02 | 8,36E-01 | -1,20E+00 |
| JHDM1D    | 2,34E+03 | 4,87E-04 | 2,70E-02 | 1,30E+00 | 1,30E+00  |
| KANSL1    | 1,47E+04 | 3,25E-04 | 2,07E-02 | 1,29E+00 | 1,29E+00  |
| KCNH8     | 1,04E+03 | 2,78E-04 | 1,82E-02 | 2,93E+00 | 2,93E+00  |
| KCNJ5     | 6,81E+02 | 8,14E-05 | 7,65E-03 | 6,16E-01 | -1,62E+00 |
| KIAA0101  | 5,88E+02 | 1,64E-04 | 1,27E-02 | 2,70E+00 | 2,70E+00  |
| KIAA0895L | 1,24E+04 | 1,72E-04 | 1,31E-02 | 1,33E+00 | 1,33E+00  |
| KIAA1009  | 1,53E+03 | 8,23E-05 | 7,69E-03 | 1,46E+00 | 1,46E+00  |
| KIAA1024  | 3,19E+03 | 7,33E-04 | 3,60E-02 | 2,96E-01 | -3,38E+00 |
| KIAA1045  | 5,88E+03 | 9,70E-05 | 8,70E-03 | 7,41E-01 | -1,35E+00 |
| KIF11     | 1,47E+02 | 2,44E-04 | 1,67E-02 | 3,74E+00 | 3,74E+00  |
| KIF15     | 4,36E+02 | 2,15E-04 | 1,55E-02 | 2,33E+00 | 2,33E+00  |
| KIF20A    | 1,34E+02 | 5,47E-06 | 9,54E-04 | 5,98E+00 | 5,98E+00  |
| KIF4A     | 7,23E+02 | 1,68E-04 | 1,29E-02 | 1,64E+00 | 1,64E+00  |
| LAMB2     | 3,73E+03 | 4,09E-10 | 3,63E-07 | 1,81E+00 | 1,81E+00  |
| LAPTM4B   | 3,01E+04 | 2,40E-04 | 1,67E-02 | 1,20E+00 | 1,20E+00  |
| LBR       | 4,13E+03 | 5,89E-06 | 1,00E-03 | 1,86E+00 | 1,86E+00  |
| LENG8     | 1,12E+04 | 4,85E-04 | 2,70E-02 | 1,72E+00 | 1,72E+00  |
| LHX8      | 1,05E+04 | 2,08E-04 | 1,51E-02 | 1,20E+00 | 1,20E+00  |
| LINC00086 | 1,18E+03 | 3,99E-04 | 2,38E-02 | 7,21E-01 | -1,39E+00 |
| LINC00473 | 3,08E+02 | 3,78E-04 | 2,28E-02 | 2,18E+00 | 2,18E+00  |
| LINC00630 | 4,00E+03 | 7,84E-05 | 7,50E-03 | 7,81E-01 | -1,28E+00 |
| LOC254100 | 7,50E+02 | 4,26E-05 | 4,71E-03 | 1,55E+00 | 1,55E+00  |
| LOC283922 | 1,24E+03 | 5,59E-04 | 2,97E-02 | 1,40E+00 | 1,40E+00  |
| LOC441155 | 8,27E+03 | 1,32E-04 | 1,11E-02 | 1,21E+00 | 1,21E+00  |
| LOC646471 | 1,71E+03 | 9,02E-06 | 1,42E-03 | 1,41E+00 | 1,41E+00  |
| LRIG1     | 9,69E+03 | 3,39E-04 | 2,13E-02 | 1,39E+00 | 1,39E+00  |
| LRP2      | 2,46E+03 | 2,63E-05 | 3,27E-03 | 1,51E+00 | 1,51E+00  |

|          |          |          |          |          |           |
|----------|----------|----------|----------|----------|-----------|
| MALAT1   | 2,71E+05 | 1,25E-05 | 1,84E-03 | 1,70E+00 | 1,70E+00  |
| MATK     | 3,70E+03 | 9,05E-13 | 1,13E-09 | 6,77E-01 | -1,48E+00 |
| MATN2    | 1,32E+03 | 4,07E-08 | 2,06E-05 | 1,64E+00 | 1,64E+00  |
| MCM3     | 1,41E+03 | 1,19E-04 | 1,02E-02 | 2,88E+00 | 2,88E+00  |
| MCM3AP   | 3,44E+03 | 1,10E-03 | 4,81E-02 | 1,16E+00 | 1,16E+00  |
| MDGA1    | 7,83E+03 | 3,12E-06 | 6,30E-04 | 1,62E+00 | 1,62E+00  |
| MDM1     | 3,88E+02 | 7,71E-04 | 3,76E-02 | 1,84E+00 | 1,84E+00  |
| MED20    | 1,01E+03 | 5,89E-04 | 3,09E-02 | 1,32E+00 | 1,32E+00  |
| MELK     | 2,30E+02 | 1,74E-06 | 3,98E-04 | 3,09E+00 | 3,09E+00  |
| METTL10  | 1,29E+03 | 4,55E-04 | 2,60E-02 | 1,32E+00 | 1,32E+00  |
| MFF      | 1,80E+03 | 8,07E-04 | 3,88E-02 | 1,49E+00 | 1,49E+00  |
| MGST1    | 1,28E+03 | 1,11E-03 | 4,85E-02 | 2,16E+00 | 2,16E+00  |
| MIS18BP1 | 4,05E+02 | 8,27E-07 | 2,19E-04 | 2,26E+00 | 2,26E+00  |
| MLC1     | 1,60E+02 | 4,31E-04 | 2,49E-02 | 2,47E+00 | 2,47E+00  |
| MLF1IP   | 2,72E+02 | 8,12E-04 | 3,88E-02 | 3,06E+00 | 3,06E+00  |
| MRC2     | 1,03E+04 | 2,11E-07 | 7,46E-05 | 1,63E+00 | 1,63E+00  |
| MSH5     | 1,25E+02 | 5,93E-04 | 3,10E-02 | 2,53E+00 | 2,53E+00  |
| MT3      | 5,09E+03 | 4,14E-04 | 2,45E-02 | 7,71E-01 | -1,30E+00 |
| MYO10    | 8,16E+02 | 4,58E-05 | 4,95E-03 | 1,56E+00 | 1,56E+00  |
| NCBP2    | 1,35E+04 | 1,95E-05 | 2,52E-03 | 1,39E+00 | 1,39E+00  |
| NDN      | 5,15E+04 | 6,63E-04 | 3,34E-02 | 8,77E-01 | -1,14E+00 |
| NDRG1    | 6,53E+03 | 8,56E-04 | 4,01E-02 | 7,23E-01 | -1,38E+00 |
| NECAB2   | 7,16E+03 | 8,53E-06 | 1,35E-03 | 7,56E-01 | -1,32E+00 |
| NEFM     | 2,48E+05 | 3,27E-04 | 2,07E-02 | 7,11E-01 | -1,41E+00 |
| NEK2     | 1,53E+02 | 2,47E-04 | 1,67E-02 | 3,19E+00 | 3,19E+00  |
| NFATC3   | 1,46E+03 | 3,73E-04 | 2,28E-02 | 1,47E+00 | 1,47E+00  |
| NFATC4   | 5,32E+02 | 1,42E-04 | 1,16E-02 | 2,42E+00 | 2,42E+00  |
| NFIB     | 5,78E+02 | 4,48E-05 | 4,89E-03 | 1,91E+00 | 1,91E+00  |
| NFKB2    | 4,49E+02 | 2,42E-04 | 1,67E-02 | 2,34E+00 | 2,34E+00  |
| NGEF     | 9,25E+03 | 1,35E-04 | 1,12E-02 | 8,55E-01 | -1,17E+00 |
| NIPA2    | 3,18E+03 | 9,34E-04 | 4,26E-02 | 1,90E+00 | 1,90E+00  |
| NKAIN1   | 4,37E+04 | 5,49E-06 | 9,54E-04 | 8,33E-01 | -1,20E+00 |
| NOD1     | 1,78E+02 | 1,38E-04 | 1,13E-02 | 2,46E+00 | 2,46E+00  |
| NOTCH2NL | 2,50E+03 | 3,11E-05 | 3,64E-03 | 1,59E+00 | 1,59E+00  |
| NPC2     | 7,17E+03 | 1,14E-08 | 7,11E-06 | 1,31E+00 | 1,31E+00  |
| NR2C1    | 8,94E+02 | 1,09E-03 | 4,81E-02 | 1,51E+00 | 1,51E+00  |
| NR2F2    | 5,62E+02 | 3,80E-04 | 2,28E-02 | 1,68E+00 | 1,68E+00  |
| NRTN     | 3,97E+02 | 6,71E-04 | 3,36E-02 | 5,03E-01 | -1,99E+00 |
| NTMT1    | 6,73E+02 | 5,81E-05 | 5,98E-03 | 5,99E-01 | -1,67E+00 |
| NTSR1    | 3,66E+03 | 7,30E-04 | 3,60E-02 | 6,18E-01 | -1,62E+00 |
| NUF2     | 1,73E+02 | 1,74E-05 | 2,30E-03 | 4,91E+00 | 4,91E+00  |
| NUSAP1   | 1,86E+02 | 9,75E-05 | 8,70E-03 | 2,94E+00 | 2,94E+00  |
| NXF1     | 7,21E+03 | 4,66E-06 | 8,46E-04 | 1,29E+00 | 1,29E+00  |
| OTUB2    | 3,34E+03 | 1,03E-05 | 1,57E-03 | 7,48E-01 | -1,34E+00 |
| OXLD1    | 4,32E+02 | 6,99E-04 | 3,46E-02 | 1,57E+00 | 1,57E+00  |
| PAK6     | 7,98E+03 | 1,22E-05 | 1,81E-03 | 1,26E+00 | 1,26E+00  |
| PAQR6    | 1,68E+02 | 8,73E-04 | 4,05E-02 | 2,29E+00 | 2,29E+00  |
| PAR-SN   | 3,10E+04 | 1,10E-03 | 4,81E-02 | 8,52E-01 | -1,17E+00 |
| PCDHAC2  | 1,32E+04 | 8,48E-05 | 7,78E-03 | 7,31E-01 | -1,37E+00 |
| PCM1     | 9,06E+03 | 7,87E-04 | 3,82E-02 | 1,38E+00 | 1,38E+00  |



|            |          |          |          |          |           |
|------------|----------|----------|----------|----------|-----------|
| PFKFB2     | 7,36E+02 | 1,19E-30 | 6,41E-27 | 3,75E-02 | -2,67E+01 |
| PFN2       | 6,99E+04 | 6,87E-04 | 3,42E-02 | 1,11E+00 | 1,11E+00  |
| PHF20L1    | 6,22E+03 | 2,48E-04 | 1,67E-02 | 1,43E+00 | 1,43E+00  |
| PHF21B     | 1,40E+03 | 9,77E-04 | 4,40E-02 | 1,43E+00 | 1,43E+00  |
| PIP4K2C    | 6,30E+03 | 5,49E-04 | 2,95E-02 | 8,85E-01 | -1,13E+00 |
| PLEKHG1    | 8,42E+03 | 2,06E-04 | 1,51E-02 | 1,21E+00 | 1,21E+00  |
| PLS3       | 1,07E+04 | 1,57E-06 | 3,73E-04 | 1,52E+00 | 1,52E+00  |
| PLXNA2     | 5,34E+04 | 1,84E-04 | 1,39E-02 | 8,63E-01 | -1,16E+00 |
| PLXNB1     | 7,86E+03 | 8,08E-06 | 1,31E-03 | 1,26E+00 | 1,26E+00  |
| PNPLA3     | 6,94E+03 | 1,05E-04 | 9,22E-03 | 6,61E-01 | -1,51E+00 |
| POLH       | 2,59E+03 | 9,51E-04 | 4,33E-02 | 1,21E+00 | 1,21E+00  |
| POLR3E     | 2,57E+03 | 5,72E-04 | 3,01E-02 | 1,25E+00 | 1,25E+00  |
| PRKD3      | 2,73E+03 | 1,06E-09 | 7,80E-07 | 1,58E+00 | 1,58E+00  |
| PSMD6      | 3,80E+03 | 1,57E-04 | 1,22E-02 | 1,25E+00 | 1,25E+00  |
| PTK7       | 5,10E+03 | 3,45E-04 | 2,15E-02 | 1,53E+00 | 1,53E+00  |
| PTN        | 2,94E+04 | 1,82E-14 | 2,94E-11 | 1,57E+00 | 1,57E+00  |
| PTPRD      | 2,22E+03 | 8,67E-08 | 3,89E-05 | 1,82E+00 | 1,82E+00  |
| PTTG1      | 5,79E+02 | 1,38E-06 | 3,42E-04 | 1,86E+00 | 1,86E+00  |
| PXDN       | 6,41E+03 | 5,76E-05 | 5,96E-03 | 1,52E+00 | 1,52E+00  |
| RAB11FIP1  | 5,97E+03 | 1,86E-05 | 2,44E-03 | 8,23E-01 | -1,22E+00 |
| RAB13      | 1,27E+03 | 9,53E-06 | 1,48E-03 | 2,39E+00 | 2,39E+00  |
| RAB38      | 1,39E+02 | 4,53E-04 | 2,60E-02 | 2,43E+00 | 2,43E+00  |
| RAD51AP1   | 1,09E+02 | 5,56E-04 | 2,96E-02 | 3,09E+00 | 3,09E+00  |
| RASGEF1C   | 1,06E+03 | 1,20E-05 | 1,80E-03 | 6,35E-01 | -1,58E+00 |
| RASGRP2    | 6,07E+03 | 9,28E-04 | 4,26E-02 | 6,92E-01 | -1,45E+00 |
| RBM12B-AS1 | 1,45E+03 | 3,76E-04 | 2,28E-02 | 1,30E+00 | 1,30E+00  |
| RCAN1      | 1,05E+04 | 5,14E-04 | 2,79E-02 | 7,17E-01 | -1,40E+00 |
| RENBP      | 3,82E+02 | 2,04E-04 | 1,51E-02 | 1,77E+00 | 1,77E+00  |
| RET        | 1,45E+03 | 3,63E-06 | 7,15E-04 | 6,93E-01 | -1,44E+00 |
| RFTN2      | 7,49E+02 | 4,63E-04 | 2,61E-02 | 2,07E+00 | 2,07E+00  |
| RFX4       | 1,60E+03 | 6,58E-07 | 1,86E-04 | 1,84E+00 | 1,84E+00  |
| RFXANK     | 2,86E+03 | 7,90E-05 | 7,51E-03 | 1,39E+00 | 1,39E+00  |
| RHOB       | 2,10E+04 | 2,12E-07 | 7,46E-05 | 7,32E-01 | -1,37E+00 |
| RNF169     | 2,77E+03 | 6,87E-04 | 3,42E-02 | 1,27E+00 | 1,27E+00  |
| RNF175     | 2,11E+03 | 6,65E-06 | 1,09E-03 | 6,80E-01 | -1,47E+00 |
| RNU12      | 7,27E+02 | 4,90E-07 | 1,44E-04 | 2,18E+00 | 2,18E+00  |
| RPS12      | 2,59E+04 | 1,06E-04 | 9,22E-03 | 1,22E+00 | 1,22E+00  |
| RPS20      | 2,39E+04 | 1,70E-05 | 2,27E-03 | 1,30E+00 | 1,30E+00  |
| RPS6       | 5,17E+04 | 9,08E-05 | 8,19E-03 | 1,30E+00 | 1,30E+00  |
| RRM2       | 3,92E+02 | 4,01E-09 | 2,82E-06 | 4,11E+00 | 4,11E+00  |
| RRP7B      | 4,04E+03 | 1,89E-04 | 1,42E-02 | 1,67E+00 | 1,67E+00  |
| RSPH4A     | 4,86E+02 | 4,89E-04 | 2,71E-02 | 1,58E+00 | 1,58E+00  |
| RTTN       | 8,09E+02 | 6,97E-05 | 6,79E-03 | 1,83E+00 | 1,83E+00  |
| SATB1      | 2,56E+03 | 1,50E-11 | 1,62E-08 | 1,59E+00 | 1,59E+00  |
| SCAF11     | 2,64E+03 | 1,91E-04 | 1,43E-02 | 1,23E+00 | 1,23E+00  |
| SCO1       | 2,12E+03 | 2,33E-04 | 1,66E-02 | 1,31E+00 | 1,31E+00  |
| SDHAP2     | 2,66E+03 | 5,41E-04 | 2,91E-02 | 1,42E+00 | 1,42E+00  |
| SEC61G     | 1,69E+04 | 8,10E-04 | 3,88E-02 | 1,25E+00 | 1,25E+00  |
| SEMA6D     | 1,26E+03 | 1,57E-04 | 1,22E-02 | 1,39E+00 | 1,39E+00  |
| SENP7      | 4,21E+03 | 7,36E-07 | 1,98E-04 | 1,26E+00 | 1,26E+00  |

|           |          |          |          |          |           |
|-----------|----------|----------|----------|----------|-----------|
| SFSWAP    | 4,35E+03 | 4,32E-04 | 2,49E-02 | 1,40E+00 | 1,40E+00  |
| SGSH      | 1,62E+03 | 8,62E-04 | 4,03E-02 | 1,31E+00 | 1,31E+00  |
| SH2D3A    | 5,79E+02 | 2,16E-04 | 1,55E-02 | 6,36E-01 | -1,57E+00 |
| SH3BGRL   | 1,57E+04 | 8,25E-04 | 3,91E-02 | 1,25E+00 | 1,25E+00  |
| SH3BGRL3  | 2,59E+04 | 6,68E-05 | 6,64E-03 | 8,86E-01 | -1,13E+00 |
| SKA3      | 2,03E+02 | 6,73E-04 | 3,36E-02 | 2,25E+00 | 2,25E+00  |
| SLC15A2   | 4,21E+02 | 3,43E-05 | 3,99E-03 | 1,80E+00 | 1,80E+00  |
| SLC16A3   | 1,11E+03 | 3,83E-06 | 7,45E-04 | 5,90E-01 | -1,69E+00 |
| SLC16A9   | 2,73E+03 | 3,10E-06 | 6,30E-04 | 1,35E+00 | 1,35E+00  |
| SLC1A3    | 2,20E+03 | 1,22E-21 | 3,94E-18 | 2,22E+00 | 2,22E+00  |
| SLC2A6    | 5,35E+03 | 1,10E-03 | 4,81E-02 | 6,85E-01 | -1,46E+00 |
| SLC35B3   | 4,74E+02 | 2,74E-04 | 1,80E-02 | 1,88E+00 | 1,88E+00  |
| SMAD3     | 2,26E+03 | 1,02E-03 | 4,59E-02 | 1,32E+00 | 1,32E+00  |
| SMARCA2   | 2,03E+03 | 7,07E-05 | 6,84E-03 | 1,32E+00 | 1,32E+00  |
| SMIM7     | 5,72E+03 | 4,10E-06 | 7,73E-04 | 1,25E+00 | 1,25E+00  |
| SNAP25    | 1,46E+04 | 3,97E-05 | 4,48E-03 | 1,33E+00 | 1,33E+00  |
| SNRPB     | 9,66E+03 | 1,35E-05 | 1,94E-03 | 1,18E+00 | 1,18E+00  |
| SOX21     | 9,37E+02 | 6,38E-11 | 6,06E-08 | 2,64E+00 | 2,64E+00  |
| SP1       | 1,21E+03 | 3,77E-04 | 2,28E-02 | 1,48E+00 | 1,48E+00  |
| SPATA6    | 9,30E+02 | 5,99E-05 | 6,05E-03 | 1,60E+00 | 1,60E+00  |
| SPC24     | 3,56E+02 | 1,89E-05 | 2,47E-03 | 4,52E+00 | 4,52E+00  |
| SPDL1     | 2,90E+03 | 1,77E-06 | 3,98E-04 | 1,31E+00 | 1,31E+00  |
| SPINT1    | 1,38E+03 | 2,30E-06 | 4,80E-04 | 6,54E-01 | -1,53E+00 |
| SPTLC2    | 1,16E+04 | 1,01E-07 | 4,27E-05 | 8,44E-01 | -1,18E+00 |
| SPTLC3    | 8,20E+01 | 9,18E-04 | 4,23E-02 | 4,01E+00 | 4,01E+00  |
| SRSF8     | 1,07E+04 | 1,20E-04 | 1,02E-02 | 8,52E-01 | -1,17E+00 |
| ST18      | 3,05E+03 | 3,60E-05 | 4,16E-03 | 1,30E+00 | 1,30E+00  |
| STK3      | 3,40E+02 | 5,22E-05 | 5,48E-03 | 2,01E+00 | 2,01E+00  |
| STK33     | 3,95E+03 | 8,38E-04 | 3,93E-02 | 1,28E+00 | 1,28E+00  |
| SULT1C4   | 8,44E+02 | 4,94E-05 | 5,22E-03 | 1,56E+00 | 1,56E+00  |
| SUSD1     | 2,79E+03 | 4,20E-04 | 2,47E-02 | 7,98E-01 | -1,25E+00 |
| SYN1      | 1,21E+04 | 7,50E-05 | 7,21E-03 | 1,39E+00 | 1,39E+00  |
| SYNRG     | 8,73E+02 | 4,32E-04 | 2,49E-02 | 1,60E+00 | 1,60E+00  |
| SYT1      | 6,53E+04 | 1,13E-06 | 2,84E-04 | 1,22E+00 | 1,22E+00  |
| SYT16     | 1,26E+04 | 6,36E-04 | 3,26E-02 | 7,48E-01 | -1,34E+00 |
| TACC3     | 6,96E+02 | 3,53E-06 | 7,05E-04 | 1,73E+00 | 1,73E+00  |
| TANC1     | 7,82E+02 | 6,29E-06 | 1,04E-03 | 2,23E+00 | 2,23E+00  |
| TARS2     | 2,78E+03 | 6,11E-04 | 3,16E-02 | 1,22E+00 | 1,22E+00  |
| TBC1D15   | 2,52E+01 | 6,50E-04 | 3,30E-02 | 4,05E+00 | 4,05E+00  |
| TCF3      | 8,87E+02 | 1,39E-04 | 1,14E-02 | 1,68E+00 | 1,68E+00  |
| TFPI2     | 2,41E+03 | 1,08E-07 | 4,27E-05 | 3,10E+00 | 3,10E+00  |
| TGFB1I1   | 3,28E+02 | 4,98E-04 | 2,73E-02 | 1,74E+00 | 1,74E+00  |
| TMEM214   | 2,90E+03 | 1,47E-04 | 1,19E-02 | 1,34E+00 | 1,34E+00  |
| TMEM45A   | 1,83E+03 | 4,02E-07 | 1,22E-04 | 1,43E+00 | 1,43E+00  |
| TMEM98    | 3,62E+03 | 2,80E-07 | 9,23E-05 | 1,72E+00 | 1,72E+00  |
| TMPO      | 6,92E+02 | 3,66E-04 | 2,25E-02 | 1,61E+00 | 1,61E+00  |
| TNC       | 6,24E+03 | 9,85E-05 | 8,74E-03 | 2,25E+00 | 2,25E+00  |
| TNFRSF10B | 1,43E+04 | 3,05E-05 | 3,63E-03 | 1,43E+00 | 1,43E+00  |
| TNFRSF19  | 2,17E+03 | 4,07E-04 | 2,42E-02 | 1,80E+00 | 1,80E+00  |
| TNRC18    | 4,07E+03 | 1,04E-04 | 9,15E-03 | 1,20E+00 | 1,20E+00  |

|         |          |          |          |          |           |
|---------|----------|----------|----------|----------|-----------|
| TOB2    | 2,55E+03 | 4,87E-06 | 8,75E-04 | 1,40E+00 | 1,40E+00  |
| TOB2P1  | 2,45E+03 | 3,27E-04 | 2,07E-02 | 1,35E+00 | 1,35E+00  |
| TOP2A   | 1,40E+03 | 2,17E-20 | 4,38E-17 | 4,05E+00 | 4,05E+00  |
| TP53    | 4,04E+03 | 6,62E-04 | 3,34E-02 | 1,57E+00 | 1,57E+00  |
| TPRG1L  | 1,06E+04 | 4,70E-05 | 5,03E-03 | 8,53E-01 | -1,17E+00 |
| TRA2A   | 4,21E+03 | 5,49E-06 | 9,54E-04 | 1,39E+00 | 1,39E+00  |
| TRIM59  | 3,05E+02 | 2,10E-04 | 1,52E-02 | 1,59E+00 | 1,59E+00  |
| TSPAN3  | 3,05E+04 | 6,32E-04 | 3,26E-02 | 1,18E+00 | 1,18E+00  |
| TST     | 5,85E+02 | 9,00E-05 | 8,17E-03 | 1,63E+00 | 1,63E+00  |
| TTC17   | 3,74E+03 | 5,86E-05 | 6,00E-03 | 1,44E+00 | 1,44E+00  |
| TTC3P1  | 4,98E+03 | 1,46E-06 | 3,57E-04 | 1,37E+00 | 1,37E+00  |
| TTC7B   | 1,01E+04 | 1,70E-05 | 2,27E-03 | 8,45E-01 | -1,18E+00 |
| TTK     | 3,87E+02 | 9,33E-04 | 4,26E-02 | 1,81E+00 | 1,81E+00  |
| TUBB4B  | 3,89E+04 | 1,31E-05 | 1,91E-03 | 8,25E-01 | -1,21E+00 |
| TULP3   | 4,63E+03 | 8,32E-06 | 1,33E-03 | 1,24E+00 | 1,24E+00  |
| UACA    | 9,38E+02 | 2,32E-06 | 4,80E-04 | 2,03E+00 | 2,03E+00  |
| UBR2    | 5,09E+03 | 4,61E-04 | 2,61E-02 | 8,48E-01 | -1,18E+00 |
| UBXN1   | 9,73E+03 | 1,99E-04 | 1,48E-02 | 1,18E+00 | 1,18E+00  |
| VARS    | 1,80E+04 | 2,68E-04 | 1,78E-02 | 8,83E-01 | -1,13E+00 |
| WDR24   | 1,61E+03 | 2,39E-04 | 1,67E-02 | 1,34E+00 | 1,34E+00  |
| WNT5A   | 5,09E+02 | 6,92E-05 | 6,78E-03 | 1,81E+00 | 1,81E+00  |
| XKR4    | 1,37E+04 | 3,64E-04 | 2,25E-02 | 7,74E-01 | -1,29E+00 |
| ZBTB38  | 2,11E+04 | 3,85E-04 | 2,31E-02 | 8,51E-01 | -1,17E+00 |
| ZEB2    | 1,75E+03 | 2,31E-06 | 4,80E-04 | 1,63E+00 | 1,63E+00  |
| ZIC3    | 1,35E+04 | 2,48E-04 | 1,67E-02 | 1,13E+00 | 1,13E+00  |
| ZNF12   | 2,03E+03 | 3,04E-04 | 1,94E-02 | 1,28E+00 | 1,28E+00  |
| ZNF238  | 1,39E+03 | 6,86E-05 | 6,76E-03 | 1,35E+00 | 1,35E+00  |
| ZNF394  | 3,21E+02 | 3,00E-05 | 3,62E-03 | 9,45E+00 | 9,45E+00  |
| ZNF449  | 1,81E+03 | 5,10E-08 | 2,50E-05 | 1,49E+00 | 1,49E+00  |
| ZNF490  | 5,15E+03 | 2,43E-04 | 1,67E-02 | 1,16E+00 | 1,16E+00  |
| ZNF833P | 3,96E+02 | 8,05E-04 | 3,88E-02 | 7,13E-01 | -1,40E+00 |
| ZNHIT2  | 2,55E+03 | 4,13E-06 | 7,73E-04 | 7,57E-01 | -1,32E+00 |
| ZWINT   | 4,77E+02 | 1,30E-07 | 4,99E-05 | 2,49E+00 | 2,49E+00  |

**Table S5: Table showing the raw data of expression for the genes whose expression change was statistically linked to the kinase activity.** Raw expression data (n=4 wells per condition) for the 53 genes regulated by a kinase-dependent mechanism [i.e., differentially expressed between (GFP and Kin-rDCLK3WT) and (Kin-rDCLK3WT and Kin-rDCLK3K543M)].

## Supplemental Table S5

Galvan et al.

Genes differentially regulated in a kinase dependent manner (see figure 6) [i.e., significant (GFP vs kin-DCLK3) and significant (kin-Dclk3 vs kin-DCLK3-K543M"Dead-kinase")]

Expression data in all samples

| Reads/million | GFP n1   | GFP n2   | GFP n3   | GFP n4   | KIN-WT n1 | KIN-WT n2 | KIN-WT n3 | KIN-WT n4 | KIN-K543M n1 | KIN-K543M n2 | KIN-K543M n3 | KIN-K543M n4 |
|---------------|----------|----------|----------|----------|-----------|-----------|-----------|-----------|--------------|--------------|--------------|--------------|
| ACAD9         | 12,6640  | 13,1454  | 10,2026  | 11,0819  | 14,7880   | 15,4246   | 17,5382   | 14,9538   | 11,3495      | 10,3331      | 11,1212      | 13,0331      |
| ADAMTS6       | 20,5290  | 18,6703  | 21,4348  | 18,4088  | 30,8808   | 28,6168   | 26,7649   | 22,4306   | 20,5608      | 21,6467      | 17,2379      | 19,3635      |
| ANK2          | 652,9299 | 640,3144 | 594,2776 | 595,1273 | 500,7046  | 486,6884  | 463,9246  | 571,6605  | 669,5407     | 522,3113     | 615,9312     | 667,8921     |
| APBB3         | 23,5951  | 30,4821  | 26,7701  | 27,2927  | 35,4913   | 31,9994   | 36,4490   | 33,5391   | 29,6898      | 29,1892      | 27,8958      | 28,8963      |
| BBX           | 59,5875  | 60,9644  | 65,6148  | 67,4075  | 90,0338   | 83,9561   | 87,3862   | 80,8571   | 58,3103      | 61,2442      | 60,7961      | 57,8671      |
| BMF           | 6,1320   | 5,9694   | 6,8329   | 6,1363   | 10,5256   | 9,6742    | 9,6842    | 13,4584   | 6,0037       | 7,2407       | 7,5068       | 7,7454       |
| BOD1L1        | 48,9231  | 51,0575  | 51,9490  | 45,8847  | 41,6674   | 43,4326   | 37,8979   | 39,9479   | 33,0617      | 33,3374      | 37,5342      | 34,0351      |
| BTBD9         | 11,7309  | 14,4790  | 15,0699  | 8,8839   | 14,5270   | 29,2934   | 35,6102   | 18,6922   | 7,3196       | 10,1068      | 12,3260      | 11,3947      |
| C1orf213      | 1,5997   | 3,7468   | 2,3400   | 3,1139   | 4,5781    | 5,7504    | 6,3290    | 4,6998    | 10,1981      | 10,4085      | 8,2483       | 10,5010      |
| DCAF13P3      | 30,6602  | 28,8227  | 32,0118  | 33,2458  | 40,1886   | 41,5383   | 35,2290   | 37,4791   | 29,1140      | 28,3530      | 34,6612      | 32,0893      |
| EFNB2         | 73,9845  | 60,4561  | 65,2404  | 60,9964  | 53,2368   | 50,6713   | 47,8108   | 55,2221   | 41,8617      | 43,0671      | 44,1142      | 38,2802      |
| ENTPD2        | 0,9331   | 1,2701   | 0,9360   | 0,8243   | 0,2610    | 0,2030    | 0,3050    | 0,1068    | 1,3981       | 0,9051       | 0,9268       | 1,0427       |
| EZR           | 39,1918  | 44,1353  | 44,0864  | 39,3821  | 32,0117   | 31,6611   | 33,5514   | 35,1413   | 24,8374      | 25,4179      | 25,0228      | 25,7684      |
| FEZF1-AS1     | 6,5320   | 9,0176   | 5,9905   | 7,9680   | 12,7873   | 11,0719   | 14,5644   | 10,6813   | 7,9776       | 8,2966       | 8,5263       | 6,6283       |
| FGD5          | 9,8646   | 10,6052  | 8,5178   | 9,1586   | 6,5241    | 8,0506    | 7,3966    | 6,6224    | 9,2112       | 9,3526       | 10,4725      | 8,7136       |
| FKBP14        | 30,1162  | 27,3704  | 29,0165  | 33,7952  | 38,8838   | 36,2616   | 38,2791   | 34,3935   | 25,3309      | 29,3400      | 24,5595      | 24,2043      |
| GNAI3         | 61,9870  | 46,1677  | 47,7369  | 51,7462  | 5,1323    | 4,8709    | 7,4728    | 6,3019    | 69,3309      | 42,3883      | 53,0112      | 47,6640      |
| HIST1H1D      | 57,1880  | 76,1417  | 65,4276  | 69,6971  | 84,3786   | 82,9413   | 99,8155   | 94,2086   | 59,9552      | 54,4561      | 45,5971      | 53,5476      |
| HIST1H2AG     | 75,1629  | 50,2135  | 65,0192  | 71,0625  | 46,6824   | 43,1319   | 54,6237   | 43,5611   | 15,8445      | 24,9230      | 25,6223      | 17,9471      |
| HIST1H2BD     | 223,8198 | 215,6811 | 228,4435 | 219,2098 | 308,4344  | 292,5123  | 323,9832  | 299,4606  | 213,7620     | 203,3748     | 211,7363     | 208,3119     |
| HIST1H3G      | 27,8608  | 30,9901  | 27,5189  | 35,0775  | 16,0058   | 14,4775   | 18,9108   | 20,0808   | 4,6879       | 5,8831       | 3,3364       | 2,1598       |
| HIST1H3I      | 131,7760 | 212,3681 | 190,6621 | 190,0625 | 283,1504  | 268,4411  | 315,5572  | 284,6137  | 242,3308     | 221,8680     | 183,4754     | 216,3515     |
| HIST1H3J      | 127,1027 | 128,3106 | 127,9349 | 127,7811 | 206,2953  | 191,6466  | 176,7336  | 178,9526  | 134,4205     | 142,8825     | 135,1091     | 125,6193     |
| HIST1H4B      | 49,5896  | 71,7599  | 61,4964  | 55,2216  | 92,0336   | 93,0215   | 101,0355  | 96,5585   | 64,1496      | 57,0960      | 58,3865      | 59,2821      |
| HIST2H3D      | 1,4664   | 1,9691   | 1,3104   | 1,7401   | 3,4795    | 3,1812    | 3,6602    | 2,7771    | 1,5626       | 2,2627       | 1,8535       | 1,5696       |
| HSD17B7       | 63,6669  | 74,8272  | 66,8640  | 63,4964  | 81,1131   | 77,4981   | 82,9483   | 80,5265   | 101,6845     | 98,7941      | 93,2516      | 94,7792      |
| INSM2         | 5,7321   | 4,9533   | 4,6801   | 4,8541   | 6,6111    | 7,3741    | 7,3966    | 9,0791    | 5,7570       | 4,9780       | 5,1899       | 5,5856       |
| JHDM1D        | 13,3305  | 13,4629  | 14,6955  | 15,9360  | 21,7471   | 21,5133   | 17,9195   | 16,3423   | 14,4748      | 15,9899      | 15,4771      | 13,8524      |
| LHX8          | 67,5858  | 63,5044  | 65,3340  | 61,0880  | 77,7675   | 90,1801   | 86,6237   | 80,6434   | 67,8505      | 77,9130      | 68,2099      | 65,1657      |
| LOC254100     | 4,3991   | 3,6833   | 4,4929   | 4,5793   | 6,7851    | 7,2388    | 7,3966    | 6,0883    | 3,6187       | 5,5814       | 3,9851       | 4,5430       |
| LOC646471     | 10,5311  | 12,0658  | 10,3898  | 9,9829   | 15,8319   | 12,5833   | 16,0894   | 13,4584   | 10,1347      | 10,2577      | 9,0823       | 11,7671      |
| MATK          | 24,2616  | 26,6718  | 25,5532  | 23,5376  | 21,2251   | 21,6486   | 19,3683   | 21,8966   | 33,4728      | 33,2619      | 28,7298      | 28,7473      |
| MATN2         | 10,6644  | 12,2563  | 11,7002  | 16,3939  | 9,7427    | 9,6742    | 9,1504    | 9,0791    | 5,7570       | 5,6568       | 5,8386       | 5,6601       |
| MDGA1         | 58,5211  | 44,3260  | 40,6232  | 50,4640  | 93,4254   | 74,3495   | 59,0200   | 60,6695   | 41,7795      | 40,5781      | 51,2504      | 44,3871      |
| NTRS1         | 38,7919  | 34,5464  | 28,9229  | 25,3694  | 17,5716   | 16,6424   | 17,0807   | 17,7309   | 33,3084      | 27,9823      | 20,4816      | 29,8635      |

|         |          |          |          |          |          |          |          |          |          |          |          |          |
|---------|----------|----------|----------|----------|----------|----------|----------|----------|----------|----------|----------|----------|
| OTUB2   | 26,7944  | 24,1317  | 26,4893  | 22,3470  | 17,8326  | 19,8220  | 20,8934  | 18,3718  | 27,7982  | 26,6247  | 21,7791  | 26,6621  |
| PFN2    | 466,9595 | 473,3850 | 460,6134 | 451,0475 | 560,0037 | 525,3995 | 538,6909 | 474,2561 | 483,2322 | 482,3584 | 466,8352 | 450,2589 |
| PHF20L1 | 37,4588  | 35,6259  | 37,6279  | 37,2756  | 66,8070  | 53,6480  | 54,5973  | 42,6182  | 34,7888  | 43,0671  | 36,4220  | 37,6844  |
| PLXNB1  | 49,3231  | 57,1539  | 50,2640  | 50,8301  | 67,9373  | 57,3010  | 60,7734  | 65,1552  | 53,6221  | 50,9863  | 48,0991  | 46,0997  |
| PTN     | 291,8055 | 222,1382 | 280,7117 | 274,3923 | 213,5563 | 208,3005 | 232,1148 | 230,3946 | 152,2319 | 114,9462 | 141,0544 | 154,6102 |
| RET     | 12,1308  | 9,9702   | 11,4194  | 9,9829   | 7,4810   | 9,1330   | 8,5404   | 6,9428   | 10,3626  | 11,2382  | 12,8821  | 11,8415  |
| RNU12   | 3,4659   | 3,3657   | 4,4929   | 5,1288   | 5,5673   | 6,8329   | 9,9892   | 8,1178   | 4,2766   | 3,0170   | 3,7071   | 2,9790   |
| SLC16A9 | 18,6628  | 19,7499  | 16,8483  | 16,3939  | 21,3121  | 23,6105  | 21,8084  | 22,8579  | 17,6823  | 17,7246  | 17,2379  | 13,7779  |
| SLC1A3  | 26,1279  | 22,6711  | 26,9573  | 26,3768  | 13,4832  | 15,0864  | 16,1657  | 15,2742  | 7,3196   | 8,0704   | 5,9313   | 5,7346   |
| SMIM7   | 34,3928  | 36,7055  | 39,3127  | 42,4044  | 45,8428  | 44,7856  | 47,4295  | 42,1909  | 37,0916  | 37,4857  | 36,6074  | 33,5138  |
| SULT1C4 | 4,5324   | 4,7628   | 5,8969   | 5,1288   | 8,6118   | 6,2916   | 8,4641   | 7,4769   | 4,8523   | 3,9220   | 6,2094   | 4,8409   |
| TNRC18  | 33,0597  | 38,9282  | 37,7215  | 34,4364  | 25,4876  | 27,8726  | 28,5187  | 25,4214  | 21,3010  | 21,7975  | 23,8180  | 22,5659  |
| TRA2A   | 23,5951  | 25,4017  | 28,8293  | 29,4908  | 39,0577  | 32,6759  | 38,7366  | 31,0824  | 23,9327  | 26,4738  | 26,2276  | 25,5449  |
| TTC3P1  | 34,2011  | 30,6277  | 28,5671  | 33,8205  | 40,3707  | 42,5529  | 43,4807  | 41,4380  | 26,5658  | 30,2082  | 35,6837  | 30,0379  |
| TULP3   | 28,3941  | 31,5617  | 31,7310  | 31,2309  | 36,3611  | 35,7202  | 39,6517  | 33,5391  | 26,4823  | 30,6221  | 29,2859  | 31,2050  |
| ZIC3    | 91,3142  | 95,6376  | 92,3849  | 81,4202  | 99,7756  | 105,4018 | 99,5867  | 101,4719 | 92,3589  | 89,3775  | 91,1015  | 87,8805  |
| ZNF394  | 0,2666   | 0,3175   | 0,6552   | 0,1832   | 8,1769   | 7,3741   | 0,9913   | 6,3019   | 0,9047   | 0,4525   | 0,4634   | 0,5958   |
| ZNF490  | 34,1694  | 36,0773  | 34,1503  | 33,7252  | 38,5383  | 40,1911  | 38,7210  | 39,8594  | 35,1844  | 31,7679  | 35,8199  | 32,8102  |

Recapitulative counts

|          | down/up | up/down | more reduced | more increased | total |
|----------|---------|---------|--------------|----------------|-------|
| n        | 34      | 8       | 2            | 9              | 53    |
| % total  | 12,36   | 2,91    | 0,73         | 3,27           |       |
| %relatif | 64,15   | 15,09   | 3,77         | 16,98          |       |
